# Supplementary material for: Beet supplementation mitigates post-exercise inflammation
Source: Front Nutr. 2024 May 30;11:1408804. doi: 10.3389/fnut.2024.1408804 (PMC11169660; doi:10.3389/fnut.2024.1408804)
Supplement: Supplementary file 1 [file Table_1.XLSX]

## Sheet: PROTEIN data
Supplement Table S2. Identified and quantified proteins and the quantitative values as reported by DIA-NN.
Protein.Group	Protein.Ids	Protein.Names	Genes	First.Protein.Description	1A_Beet_T1	1B_Beet_T2	1C_Beet_T3	1D_Beet_T4	1E_Beet_T5	1F_Beet_T6	1G_Placebo_T1	1H_Placebo_T2	1I_Placebo_T3	1J_Placebo_T4	1K_Placebo_T5	1L_Placebo_T6	2A_Beet_T1	2B_Beet_T2	2C_Beet_T3	2D_Beet_T4	2E_Beet_T5	2F_Beet_T6	2G_Placebo_T1	2H_Placebo_T2	2I_Placebo_T3	2J_Placebo_T4	2K_Placebo_T5	2L_Placebo_T6	3A_Placebo_T1	3B_Placebo_T2	3C_Placebo_T3	3D_Placebo_T4	3E_Placebo_T5	3F_Placebo_T6	3G_Beet_T1	3H_Beet_T2	3I_Beet_T3	3J_Beet_T4	3K_Beet_T5	3L_Beet_T6	4A_Beet_T1	4B_Beet_T2	4C_Beet_T3	4D_Beet_T4	4E_Beet_T5	4F_Beet_T6	4G_Placebo_T1	4H_Placebo_T2	4I_Placebo_T3
A0A075B6H7	P01624;A0A075B6H7;A0A0C4DH55	KV37_HUMAN	IGKV3-7	Probable non-functional immunoglobulin kappa variable 3-7	18000000	18800000	24900000	22700000	24800000	21600000	20900000	25600000	21600000	21200000	22600000	19300000	37400000	41600000	36600000	43900000	36700000	40000000	36600000	41200000	40800000	40600000	42500000	34100000	26600000	32000000	31000000	28700000	31200000	29100000	29700000	28500000	30000000	27900000	29500000	24700000	28600000	27400000	27300000	25900000	26100000	24300000	29300000	27600000	24600000
A0A075B6H9	A0A075B6H9	LV469_HUMAN	IGLV4-69	Immunoglobulin lambda variable 4-69	641613	801184	904576	819895	881920	1320000	648351	657069	851805	893463	1010000	663980	1120000	1040000	1090000	1070000	1180000	1180000	969925	940387	1000000	1090000	1010000	929734	743864	601754	623608	672006	883438	541983	619914	651585	618611	643925	651570	576639	749619	820911	935448	963610	998741	940338	917711	945215	1100000
A0A075B6I0	A0A075B6I0	LV861_HUMAN	IGLV8-61	Immunoglobulin lambda variable 8-61	566970	588866	548410	489808	818987	470093	587301	227698	555869	449352	503267	484577	1380000	1430000	1410000	1230000	1590000	1450000	1380000	1290000	1220000	1250000	1240000	1160000	286088	320626	215114	280141	255877	279763	233147	268680	263614	257939	325600	231842	483659	482517	532346	542387	507671	558992	503507	546751	686837
A0A075B6J9	A0A075B6J9	LV218_HUMAN	IGLV2-18	Immunoglobulin lambda variable 2-18	2450000	2370000	4100000	11700000	3260000	2640000	2680000	3860000	2680000	4290000	2740000	3090000	4400000	2480000	2520000	2500000	2650000	2820000	2520000	2540000	2260000	2730000	2680000	2420000	1560000	1190000	1440000	1440000	1350000	1520000	1590000	1490000	1370000	1370000	1520000	1690000	3870000	2250000	4580000	2340000	4220000	2620000	2210000	2660000	3700000
A0A075B6K4	A0A075B6K4	LV310_HUMAN	IGLV3-10	Immunoglobulin lambda variable 3-10		70180.2						58756.4		125235		109552	606897	589354	545769	620134	533954	654852	596100	617608	666304	616349	676312	545373	300378	332095	309827	314716	397213	293188	377328	270762	350413	346462	298573	258281	279769	303876	306438	303432	346109	248858	376185	336099	348216
A0A075B6P5;P01615	P01615;A0A075B6P5	KV228_HUMAN;KVD28_HUMAN	IGKV2-28;IGKV2D-28	Immunoglobulin kappa variable 2-28	4620000	5490000	8150000	6190000	7220000	6420000	6300000	7290000	6380000	6820000	7000000	6240000	8540000	8460000	9240000	9880000	8440000	8830000	8250000	8370000	8850000	10100000	9770000	8650000	5540000	6940000	7370000	6490000	6950000	5770000	5620000	6690000	6470000	5700000	6130000	5400000	11300000	9950000	11000000	9140000	8940000	8650000	9640000	9480000	8550000
A0A075B6R2	A0A075B6R2	HV404_HUMAN	IGHV4-4	Immunoglobulin heavy variable 4-4	12900000	12900000	10900000	13800000	19300000	29600000	14000000	16000000	16400000	16200000	16100000	21700000	35800000	36200000	25200000	30700000	21400000	43800000	29600000	24500000	24400000	23700000	25400000	21100000	24400000	31700000	33600000	32400000	37100000	21100000	31800000	31900000	28300000	26400000	29800000	21600000	21600000	23900000	30600000	35600000	33300000	21700000	22000000	22800000	27500000
A0A075B6S2	A0A075B6S2;A2NJV5	KVD29_HUMAN	IGKV2D-29	Immunoglobulin kappa variable 2D-29	4250000	4910000	5700000	3980000	3080000	1750000	2640000	3960000	3710000	1010000	1090000	1860000	4520000	4340000	4540000	4870000	4200000	4740000	4880000	4880000	5050000	4720000	5180000	4300000	4620000	5080000	4750000	4750000	5050000	5440000	4560000	4970000	4370000	4280000	4710000	3640000	3890000	4030000	3570000	3510000	3670000	3210000	3840000	3770000	3210000
A0A075B6S5	A0A075B6S5	KV127_HUMAN	IGKV1-27	Immunoglobulin kappa variable 1-27	6800000	8600000	10400000	11300000	10600000	10900000	10900000	15000000	11700000	8610000	9530000	6760000	12300000	11000000	12400000	12100000	10800000	13100000	10900000	11000000	11900000	13000000	13500000	9660000	9340000	10800000	10900000	9840000	10300000	9780000	10200000	10400000	9420000	9160000	10400000	7100000	9840000	9960000	9500000	9590000	9080000	8220000	12500000	10100000	9710000
A0A087WSY6	A0A087WSY6	KVD15_HUMAN	IGKV3D-15	Immunoglobulin kappa variable 3D-15	2810000	2900000	4090000	3170000	3980000	3090000	2730000	3900000	2920000	2870000	2670000	2360000	3470000	3280000	3600000	3350000	3340000	3600000	3560000	3510000	3640000	3620000	3510000	3460000	3120000	3010000	3170000	3020000	2960000	3070000	2910000	3290000	2940000	2640000	2960000	2760000	2330000	2470000	2240000	2280000	2860000	1980000	2660000	2350000	1890000
A0A087WW87;P01614	P01614;A0A087WW87	KV240_HUMAN;KVD40_HUMAN	IGKV2-40;IGKV2D-40	Immunoglobulin kappa variable 2-40	84337.3	122340	143720	108797	210253	118028	188837	232734	222562	207943	118576	79989.7	257168	278155	243170	340652	272869	293693	235913	266913	218820	253285	394223	218852	204033	258824	252906	199259	282209	220460	260988	295500	263348	272327	212798	210281	332086	207652	218900	224842	348342	323811	314257	376991	366885
A0A0A0MS14	A0A0A0MS14	HV145_HUMAN	IGHV1-45	Immunoglobulin heavy variable 1-45	321843	356019	308602	282482	314609	261491	258532	273742	279393	124891	101638	95975.9	463225	423944	481429	345953	471977	377035	516836	470799	377199	345220	425656	357663	354667	300217	294086	328649	284254	332293	281979	332408	272183	274834	310864	270632	232064	308112	214299	298332	289649	271141	266887	346668	272090
A0A0A0MS15	A0A0A0MS15;A0A0B4J1V6	HV349_HUMAN	IGHV3-49	Immunoglobulin heavy variable 3-49	40400000	66600000	53600000	54400000	55200000	66000000	62000000	55400000	61200000	51700000	54700000	42100000	160000000	138000000	142000000	132000000	145000000	150000000	152000000	134000000	130000000	133000000	135000000	132000000	99200000	83000000	92300000	90300000	94200000	79800000	75900000	91600000	79700000	91500000	89600000	76800000	89500000	98500000	88500000	110000000	95000000	101000000	100000000	108000000	142000000
A0A0A0MT36	A0A0A0MT36;A0A0C4DH26	KVD21_HUMAN	IGKV6D-21	Immunoglobulin kappa variable 6D-21	1470000	1230000	4820000	1650000	3990000	1520000	1480000	1350000	1200000	1100000	1360000	1630000	1400000	1270000	1520000	1560000	1590000	1710000	1590000	1630000	1580000	1530000	1690000	1360000	1460000	1470000	1480000	1420000	1460000	1750000	1800000	1540000	1460000	1390000	1880000	1230000	1670000	1980000	1560000	1790000	1460000	1750000	1820000	2030000	2180000
A0A0B4J1U3	A0A0B4J1U3	LV136_HUMAN	IGLV1-36	Immunoglobulin lambda variable 1-36													95315.1	98456.5	164114	152332	136747	161878	181990	185441	149690		150127	97757.1		141473	66977.4	98533.9	86408.2	144344	102998	124785	77882.5		89162.8								66270.2	83434.8
A0A0B4J1U7	A0A0B4J1U7	HV601_HUMAN	IGHV6-1	Immunoglobulin heavy variable 6-1	7250000	8020000	10100000	7540000	10700000	8310000	8310000	8000000	6570000	6050000	5570000	5090000	8850000	6540000	6560000	7480000	7650000	9520000	7620000	9120000	8790000	7710000	8380000	7280000	4850000	4360000	4090000	4820000	5010000	4530000	5150000	4210000	3900000	4370000	3960000	3690000	4770000	5990000	4780000	4890000	5400000	5140000	5680000	5520000	6750000
A0A0B4J1V0	A0A0B4J1V0	HV315_HUMAN	IGHV3-15	Immunoglobulin heavy variable 3-15	1390000	1670000	2120000	1660000	2570000	1920000	1670000	1570000	1640000	1710000	1810000	1610000	2220000	1920000	2000000	2160000	2030000	2100000	1990000	1890000	2010000	1970000	2130000	1960000	1660000	1510000	1540000	1500000	1890000	1420000	1650000	1710000	1740000	1700000	1750000	1710000	1800000	1970000	1640000	1700000	1690000	1640000	2090000	1770000	1880000
A0A0B4J1V2	A0A0B4J1V2	HV226_HUMAN	IGHV2-26	Immunoglobulin heavy variable 2-26	1170000	1560000	2080000	1400000	2210000	1800000	1650000	1670000	1550000	1420000	1250000	1190000	2100000	2070000	2010000	1980000	2380000	2440000	2350000	2700000	2520000	2600000	2750000	1980000	2340000	2250000	2590000	2480000	2790000	2410000	2440000	2430000	2210000	2090000	2190000	1830000	1870000	1980000	2210000	2290000	2350000	2050000	1990000	2190000	2170000
A0A0B4J1X5	P01764;P01768;P01772;P01767;A0A0B4J1X5;A0A0C4DH42;P0DP02;P0DP03	HV374_HUMAN	IGHV3-74	Immunoglobulin heavy variable 3-74	64700000	70200000	83800000	62300000	79700000	61200000	63200000	68600000	66100000	42300000	34000000	38500000	86200000	77700000	86100000	77700000	85000000	93500000	86000000	85500000	82400000	82500000	88100000	77100000	71200000	67800000	68100000	67700000	71400000	69700000	62300000	71700000	70500000	67400000	76600000	70500000	65900000	87300000	58600000	65100000	69300000	65000000	82800000	90600000	74400000
A0A0B4J1X8	A0A0B4J1X8	HV343_HUMAN	IGHV3-43	Immunoglobulin heavy variable 3-43	3420000	3310000	4230000	2800000	3620000	3030000	2640000	3220000	2880000	2060000	1750000	1550000	2990000	3040000	3950000	3060000	3240000	3880000	3100000	3300000	3090000	3360000	3300000	2630000	2030000	1800000	1970000	2080000	1610000	1750000	1750000	1950000	1720000	1720000	1750000	1620000	1780000	2060000	1850000	1730000	1900000	1770000	2200000	2080000	1830000
A0A0B4J1Y9	A0A0B4J1Y9	HV372_HUMAN	IGHV3-72	Immunoglobulin heavy variable 3-72	19300000	18300000	20500000	16500000	25500000	17200000	18200000	20400000	18200000	17000000	16800000	14900000	27800000	24600000	27800000	24900000	26800000	27100000	27500000	26600000	22900000	24300000	27300000	22000000	22000000	17800000	18100000	20300000	20300000	18700000	16500000	20700000	16200000	18900000	19100000	16700000	15300000	21700000	15200000	16200000	16500000	18000000	28200000	24200000	23800000
A0A0B4J2D9;P0DP09	A0A0B4J2D9;P0DP09	KV113_HUMAN;KVD13_HUMAN	IGKV1-13;IGKV1D-13	Immunoglobulin kappa variable 1D-13	5800000	4880000	6080000	6360000	6220000	5330000	6080000	6240000	4780000	4680000	4210000	4000000	7940000	6970000	7310000	7010000	7510000	7700000	7740000	8280000	7270000	7050000	7790000	6640000	7450000	6570000	7110000	6710000	6480000	7250000	6160000	6800000	5940000	6480000	6680000	6580000	5950000	6070000	4820000	6090000	5840000	5830000	6760000	6290000	6300000
A0A0C4DH25	A0A0C4DH25	KVD20_HUMAN	IGKV3D-20	Immunoglobulin kappa variable 3D-20	4520000	3900000	6260000	4710000	5990000	4860000	4730000	5900000	5160000	4660000	4760000	4420000	6840000	6390000	6620000	6610000	6030000	6420000	6530000	6380000	6550000	6210000	6620000	5680000	5460000	5840000	6220000	5810000	5850000	5270000	5970000	6190000	5660000	5210000	5700000	5610000	5560000	5150000	5270000	4850000	4910000	4630000	5320000	5140000	4930000
A0A0C4DH30	A0A0C4DH30	HV316_HUMAN	IGHV3-16	Probable non-functional immunoglobulin heavy variable 3-16	162849	153012	176058	165390	216986	143439	135298	175243	151838	90972.6	95298.1	98286.5	519359	400307	466481	344482	466453	394493	475043	466681	372546	360496	422405	401551	303625	274460	280782	254940	232890	293151	252684	322362	266560	262783	307994	257551	189831	195995	164816	175746	203903	150914	187371	222811	160986
A0A0C4DH31	A0A0C4DH31	HV118_HUMAN	IGHV1-18	Immunoglobulin heavy variable 1-18	275991	409893	437941	323121	519722	373791	382594	314829	414857	674795	595715	542244	630548	767917	794408	1020000	840381	938208	501119	435133	619435	1080000	644991	730341	317370	351033	567412	575713	737407	350405	552272	473168	540434	512425	402239	439006	474712	436462	599645	566771	520653	581459	576258	565358	902802
A0A0C4DH34	A0A0C4DH34	HV428_HUMAN	IGHV4-28	Immunoglobulin heavy variable 4-28	2540000	2730000	2960000	2830000	2680000	2640000	2520000	2800000	2500000	2310000	2200000	1740000	3990000	3560000	4120000	3580000	3820000	4320000	4120000	3810000	3920000	3980000	4340000	3460000	3430000	3050000	3700000	3270000	3140000	3190000	2940000	3150000	2850000	2580000	3110000	2150000	2160000	2430000	2240000	2310000	2440000	1990000	2410000	2670000	2220000
A0A0C4DH35	A0A0C4DH35	HV335_HUMAN	IGHV3-35	Probable non-functional immunoglobulin heavy variable 3-35	1060000	1040000	1010000	907496	1050000	844224	872459	839471	816471	312078	198117	286902	1540000	1400000	1520000	1060000	1500000	1230000	1520000	1460000	1190000	1090000	1250000	1230000	930398	854984	781675	860923	790222	930901	882216	909901	734605	791425	980165	813243	689787	805309	577716	830209	747030	700026	732695	896925	759499
A0A0C4DH36	A0A0C4DH36	HV338_HUMAN	IGHV3-38	Probable non-functional immunoglobulin heavy variable 3-38	7340000	8550000	10000000	8620000	11000000	7580000	8380000	7980000	9020000	8740000	4630000	6410000	12900000	12800000	12600000	10500000	11400000	11900000	12800000	12600000	12400000	10700000	11000000	10600000	10100000	9870000	9780000	9960000	10500000	9370000	9590000	10400000	9260000	10500000	10200000	9580000	10700000	10700000	9090000	9790000	9460000	9380000	12700000	11900000	10800000
A0A0C4DH38	A0A0C4DH38	HV551_HUMAN	IGHV5-51	Immunoglobulin heavy variable 5-51	762553	688245	1140000	1030000	1200000	1040000	1070000	1420000	1130000	894597	937490	677841	1850000	2120000	2100000	2240000	1890000	2390000	2270000	2290000	2310000	2150000	2400000	1740000	1570000	2120000	1930000	1780000	2030000	1810000	1880000	1850000	1590000	1470000	1760000	1140000	1040000	1590000	1100000	1150000	1330000	1160000	1610000	1710000	1310000
A0A0C4DH43	P01814;A0A0C4DH43	HV70D_HUMAN	IGHV2-70D	Immunoglobulin heavy variable 2-70D	3430000	3200000	3900000	3470000	3480000	2490000	3010000	3720000	4580000	3490000	2990000	3270000	8430000	7880000	7360000	7330000	7830000	12500000	8730000	8620000	8760000	10800000	8330000	7030000	12900000	10000000	7680000	8620000	12500000	8680000	9380000	9820000	8670000	8560000	7910000	9160000	2260000	1910000	1080000	723355	984001	781204	1210000	1050000	1020000
A0A0C4DH67;A0A0C4DH69	A0A0C4DH67;A0A0C4DH69	KV108_HUMAN;KV109_HUMAN	IGKV1-8;IGKV1-9	Immunoglobulin kappa variable 1-8	889828	1080000	1470000	1320000	1510000	1410000	1390000	1490000	1290000	1180000	1000000	904186	1540000	1650000	1560000	1750000	1460000	1500000	1670000	1660000	1600000	1530000	1700000	1290000	1790000	2170000	2340000	2000000	2050000	1940000	2080000	1970000	1840000	1750000	1880000	1560000	1570000	1490000	1480000	1410000	1410000	1350000	1620000	1510000	1350000
A0A0C4DH68	A0A075B6R9;A0A0C4DH68	KV224_HUMAN	IGKV2-24	Immunoglobulin kappa variable 2-24	5390000	5780000	6520000	6660000	8130000	5810000	6310000	5750000	5410000	4370000	4010000	4060000	6560000	6600000	6870000	10700000	7330000	8700000	6520000	7840000	8500000	8050000	7560000	6080000	6110000	7600000	6710000	6400000	7220000	6850000	7280000	6870000	7510000	5760000	6490000	4890000	8800000	8240000	9360000	10200000	9000000	8120000	12400000	8660000	8080000
A0A0C4DH72	P01599;A0A0C4DH72	KV106_HUMAN	IGKV1-6	Immunoglobulin kappa variable 1-6	1080000	1250000	1400000	1290000	1240000	1540000	909131	1160000	947542	732338	757574	687576	1640000	1440000	1710000	1460000	1560000	1910000	1570000	1600000	1390000	1490000	1650000	1330000	1290000	1220000	1340000	1380000	1220000	1330000	1310000	1310000	1070000	1110000	1290000	1070000	1130000	1210000	1270000	1320000	1320000	1420000	1370000	1590000	1580000
A0M8Q6	A0M8Q6	IGLC7_HUMAN	IGLC7	Immunoglobulin lambda constant 7	9970000	11800000	12400000	10300000	12500000	9100000	9180000	9110000	9680000	10500000	11000000	9870000	11600000	10100000	10000000	10400000	10200000	12500000	11500000	11600000	11800000	11400000	11600000	9380000	6960000	6380000	7090000	7160000	7710000	6460000	6920000	6950000	6640000	5300000	6370000	6250000	4920000	6140000	6390000	5290000	5380000	5320000	6760000	6460000	6540000
A2NJV5	A2NJV5	KV229_HUMAN	IGKV2-29	Immunoglobulin kappa variable 2-29		1580000	2480000		2500000	2160000	2230000	2690000	2240000	2220000	2140000	1950000	2760000	2950000	3250000	3500000	2940000	3070000	3090000	3020000	3190000	3470000	3550000	2830000	1990000	2640000	2640000	2230000	2540000	2230000	2350000	2480000	2300000	1870000	2160000	1780000	3600000		2200000	3110000		2880000	3250000		2850000
B9A064	P0CG04;P0DOY2;P0DOY3;A0M8Q6;P0CF74;B9A064;P0DOX8	IGLL5_HUMAN	IGLL5	Immunoglobulin lambda-like polypeptide 5	54000000	69600000	93200000	72200000	99100000	76400000	82700000	79800000	77000000	69300000	71300000	64700000	86800000	90900000	94800000	98400000	86500000	106000000	97100000	91200000	102000000	103000000	100000000	76700000	51000000	56000000	60300000	55200000	65900000	53700000	59000000	58700000	53400000	44300000	51500000	37300000	41400000	54400000	50500000	46600000	46000000	46500000	62000000	57900000	54000000
O00151	O00151	PDLI1_HUMAN	PDLIM1	PDZ and LIM domain protein 1	5120000	5180000	23400000		24600000	18100000	10600000	28900000	6060000	6690000	12800000	5100000	7170000	6580000	7380000	7780000	6590000	6990000	7460000	7690000	6610000	7210000	6740000	14400000	5760000	6110000	7110000	7280000	17000000	4660000	6530000	6890000	7320000	6640000	5960000	6100000	8120000	7950000	13300000	7870000	8090000	8230000	7210000	6740000	10000000
O00187	O00187	MASP2_HUMAN	MASP2	Mannan-binding lectin serine protease 2	4510000	4740000	5790000	5560000	5340000	5670000	4910000	4890000	4870000	5340000	5560000	5010000	4110000	4260000	4260000	5200000	4510000	5580000	4690000	5410000	4910000	5160000	4880000	4620000	4330000	3980000	4790000	4810000	5210000	5390000	4590000	4630000	4360000	4020000	4100000	3710000	4780000	4220000	5550000	5280000	4990000	5800000	4580000	4610000	5550000
O00391	O00391	QSOX1_HUMAN	QSOX1	Sulfhydryl oxidase 1	42900000	47500000	51300000	46800000	52900000	44800000	38900000	38000000	39600000	42600000	45300000	36500000	47800000	48100000	44900000	45100000	45100000	50200000	48500000	49900000	44900000	49600000	45900000	44200000	45800000	39900000	43400000	45300000	47500000	42500000	44900000	45800000	44700000	43700000	42100000	38900000	44900000	49400000	48500000	48700000	47600000	47000000	48300000	50300000	55700000
O00462	O00462	MANBA_HUMAN	MANBA	Beta-mannosidase	2450000	2150000	3120000	2780000	2540000	2640000	2210000	2570000	1230000	1060000	970965	1070000	2010000	1730000	1750000	1610000	1530000	1850000	2080000	2270000	1980000	1720000	2190000	1870000	2690000	2700000	2200000	2370000	2080000	2770000	2210000	2500000	2200000	2020000	2340000	1900000	2120000	2560000	2010000	2410000	2350000	2460000	2380000	2450000	2140000
O00533	O00533	NCHL1_HUMAN	CHL1	Neural cell adhesion molecule L1-like protein	6390000	6460000	8050000	7470000	12500000	5600000	6650000	6560000	6310000	5390000	9710000	8460000	7850000	8040000	7250000	7200000	7150000	7170000	7780000	8460000	8310000	8060000	7520000	7270000	6700000	5600000	5990000	5770000	7220000	6260000	5630000	5870000	6760000	6400000	6270000	6380000	7280000	7140000	5940000	6610000	6780000	7400000	6270000	6950000	7550000
O14786	O14786	NRP1_HUMAN	NRP1	Neuropilin-1	32000000	17600000	27200000	31500000	23600000	21400000	33100000	25600000	22400000	16900000	17500000	20600000	19100000	22200000	24300000	24000000	25000000	26700000	22900000	25200000	23800000	33400000	27000000	15300000	24900000	23200000	26200000	22600000	24700000	23200000	18000000	29700000	22600000	30400000	19400000	22900000	22200000	23800000	43800000	22900000	27000000	24800000	30100000	24600000	18600000
O14791	O14791	APOL1_HUMAN	APOL1	Apolipoprotein L1	10700000	11500000	14300000	10400000	14100000	12200000	10300000	10700000	10600000	10500000	10200000	8780000	7120000	6690000	6590000	6680000	7230000	8460000	7440000	7650000	7380000	7320000	7860000	6620000	8370000	8160000	8290000	8360000	9100000	8380000	7610000	8910000	7610000	7060000	7430000	6480000	10800000	11600000	10400000	13500000	13200000	13100000	12600000	13800000	11400000
O14818	O14818;Q8TAA3	PSA7_HUMAN	PSMA7	Proteasome subunit alpha type-7	136982	135360				2400000			774255		2630000					1490000			1930000	1610000		2330000		485091	1860000	1980000	2620000	1420000	3640000		439973	119141			2140000	3460000		2040000					2880000	2190000	1620000
O14950;P19105	O14950;P19105	ML12A_HUMAN;ML12B_HUMAN	MYL12A;MYL12B	Myosin regulatory light chain 12B	1070000	1790000	1660000	1220000	2140000	2030000	962286	1180000	1360000	1480000	1460000	1640000	1250000	1360000	1500000	1820000	1910000	1320000	1460000	1530000	1460000	1210000	1350000	1250000	1710000	1970000	2310000	1770000	2240000	1330000	1760000	2290000	2020000	2840000	1830000	2520000	1540000	1560000	2310000	2380000	1500000	2070000	1910000	2270000	2480000
O15031	O15031	PLXB2_HUMAN	PLXNB2	Plexin-B2	8550000	10000000	14900000	7730000	12900000	9660000	9450000	6070000	8950000	5460000	9220000	10400000	8150000	8110000	7900000	10900000	8990000	8870000	8420000	8310000	9720000	8750000	9130000	9660000	7550000	7840000	9990000	8660000	9120000	7790000	8090000	9040000	9320000	11400000	7380000	14500000	12900000	11300000	19100000	16800000	11700000	10900000	10700000	10200000	10500000
O15143	O15143	ARC1B_HUMAN	ARPC1B	Actin-related protein 2/3 complex subunit 1B	8340000	13900000	13800000	11000000	14200000	8280000	11300000	12000000	12000000	13400000	12900000	10400000	8900000	7860000	7910000	8480000	7460000	8290000	7580000	7330000	7470000	8240000	7200000	7730000	8550000	7110000	8080000	7450000	8250000	6470000	6830000	7190000	7360000	8320000	7120000	8090000	6850000	8460000	8760000	7770000	7450000	7870000	7420000	7780000	7150000
O15394	O15394	NCAM2_HUMAN	NCAM2	Neural cell adhesion molecule 2	8110000	7730000	14600000	16700000	7750000	18100000	14100000	9860000	12500000	9330000	7740000	9480000	10100000	9040000	8740000	8340000	8960000	11400000	9970000	8600000	8320000	9200000	8660000	9150000	8950000	6770000	9050000	9250000	9850000	7990000	8810000	8580000	8870000	9110000	8380000	5900000	8210000	7010000	10200000	8140000	9120000	10400000	8760000	8880000	11000000
O15511	O15511	ARPC5_HUMAN	ARPC5	Actin-related protein 2/3 complex subunit 5	14800000	14000000	1450000	16300000	10400000	9870000	17800000	10700000	17600000	33200000	36400000	35800000	18800000	15700000	19600000	14700000	17400000	15800000	17200000	19300000	17300000	15800000	17300000	16300000	17600000	15900000	16500000	17000000	15800000	16900000	15000000	17900000	15700000	13700000	11500000	14600000	17700000	17300000	16400000	18200000	17800000	16600000	15800000	17900000	16300000
O43157	O43157	PLXB1_HUMAN	PLXNB1	Plexin-B1	14600000	37700000	9740000	9670000	21900000	34000000	14000000	4500000	27300000	18000000	16800000	21200000	49400000	26900000	27300000	48500000	29800000	44900000	48300000	26600000	44000000	25800000	41900000	49100000	53400000	41300000	45700000	51700000	43800000	50600000	18200000	51200000	34800000	54300000	49900000	53400000	26500000	49300000	49800000	48400000	45400000	49400000	30700000	37800000	18200000
O43505	O43505	B4GA1_HUMAN	B4GAT1	Beta-1,4-glucuronyltransferase 1	13700000	7510000	17200000	13100000	11800000	13600000	7330000	11800000	8140000	11000000	4290000	6780000	19600000	15300000	19100000	14500000	15300000	15500000	18700000	7750000	17100000	15300000	17200000	14500000	8530000	16200000	8160000	8200000	6410000	16900000	12700000	14400000	11500000	11700000	14500000	11600000	15600000	17700000	11500000	13100000	7400000	12700000	20100000	19100000	15800000
O43707	O43707	ACTN4_HUMAN	ACTN4	Alpha-actinin-4	3840000	4650000	4100000	3570000	7180000	3640000	5630000	2760000	5270000	5290000	5750000	4850000	5580000	5530000	5540000	6100000	6740000	5380000	1870000	4590000	4420000	5320000	5330000	5290000	5270000	4300000	2250000	5330000	6450000	5160000	5550000	4890000	5290000	5210000	5310000	5370000	6470000	5860000	6770000	6040000	6470000	6960000	5350000	6550000
O43866	O43866	CD5L_HUMAN	CD5L	CD5 antigen-like	9650000	12200000	14400000	11200000	15300000	12000000	12100000	13900000	12700000	12200000	12700000	10600000	11600000	10900000	11800000	11700000	10800000	12400000	12400000	11600000	11600000	11800000	11900000	10400000	5050000	4900000	5430000	5280000	5560000	4770000	5000000	5230000	5080000	4540000	4850000	4280000	10600000	16700000	12400000	11400000	11800000	11800000	16300000	18800000	19400000
O43895	O43895	XPP2_HUMAN	XPNPEP2	Xaa-Pro aminopeptidase 2	30300000	29300000	47300000	38500000	41100000	51900000	27600000	42200000	25400000	13000000	14200000	12400000	41700000	40700000	44200000	48800000	42300000	70200000	40900000	46600000	42500000	50700000	48300000	40300000	36600000	42500000	46800000	50800000	47500000	65500000	43400000	45400000	48300000	41900000	39500000	43800000	44300000	38300000	51200000	44900000	44800000	62000000	45500000	46300000	43500000
O60462	O60462	NRP2_HUMAN	NRP2	Neuropilin-2	9290000	10800000	10100000	8350000	9040000	9160000	8460000	8450000	8370000	9730000	10700000	7900000	6680000	7330000	7310000	7730000	8200000	7650000	8830000	7430000	7540000	8540000	7620000	8020000	8340000	7110000	8530000	8240000	8910000	7230000	8230000	8310000	9410000	8610000	8470000	8210000	10300000	10700000	11300000	10600000	10900000	11500000	10200000	10200000	8750000
O75015	O75015	FCG3B_HUMAN	FCGR3B	Low affinity immunoglobulin gamma Fc region receptor III-B	37500000	45000000	39200000	39000000	26100000	38700000	35700000	31300000	40000000	44800000	41100000	38000000	36600000	33600000	29600000	30100000	32400000	34300000	33500000	30800000	27400000	30800000	29800000	31800000	33900000	25800000	28600000	30400000	34000000	28500000	28500000	30900000	29000000	32600000	29300000	25200000	28000000	26900000	27700000	28700000	29400000	30900000	27100000	30200000	38100000
O75083	O75083	WDR1_HUMAN	WDR1	WD repeat-containing protein 1	103000000	86800000	144000000	109000000	155000000	136000000	148000000	96200000	88000000	107000000	96300000	76100000	100000000	102000000	107000000	92200000	101000000	110000000	106000000	106000000	104000000	101000000	110000000	101000000	86400000	87200000	98200000	98300000	101000000	89200000	88300000	97900000	98800000	93600000	92800000	94700000	101000000	96000000	110000000	107000000	105000000	111000000	105000000	113000000	131000000
O75144	O75144	ICOSL_HUMAN	ICOSLG	ICOS ligand	16500.8		23008.7	31024.8	31364.3	35714.5		42238.2	29589	22997.4		31953.7		27086.1	21876.8	23704	14275.9	26378.7	21966.7	25800	25040.2	21537.5	36432.8	21975	29069.2	35578.5	41774.9	32598.1	43530.8	33082.6	39644.1	32273.7	24826.5	16781.6	17587	4179.64	56350.9	48810.7	65141.2	55527.8	47295.6	57468.2	47589.3	47308.1	49944.6
O75223	O75223	GGCT_HUMAN	GGCT	Gamma-glutamylcyclotransferase	1790000	2090000	2430000	2360000	2430000	2250000	1690000	1460000	2760000	1820000	1270000	1490000	1730000	1330000	1650000	1530000	1490000	1980000	1560000	1470000	1370000	1400000	1470000	1570000	1890000	1370000	1480000	1720000	2250000	1830000	1440000	1760000	1380000	1650000	1760000	1210000	1060000	1090000	1120000	1250000	1210000	1310000	1020000	1170000	1900000
O75636	O75636	FCN3_HUMAN	FCN3	Ficolin-3	10200000	7490000	10300000	8150000	9480000	8590000	9170000	10200000	9700000	6860000	7470000	7010000	6580000	6630000	7100000	6400000	7090000	8030000	7540000	8070000	7940000	7470000	7780000	6870000	5530000	5970000	5870000	5920000	4920000	6950000	6570000	6590000	6180000	6230000	6100000	7490000	8290000	7980000	9200000	8970000	8380000	8460000	9230000	9280000	8880000
O75882	O75882	ATRN_HUMAN	ATRN	Attractin	31800000	34900000	37600000	31100000	39700000	33500000	30900000	28500000	30100000	22800000	24600000	20900000	20800000	19600000	21100000	19900000	20300000	21900000	20300000	19700000	17900000	19300000	20200000	18200000	23200000	20200000	22400000	22100000	23900000	21500000	21400000	22100000	20700000	19800000	20600000	19900000	17800000	20500000	20600000	22500000	21000000	22900000	20000000	23200000	23400000
O94985	O94985	CSTN1_HUMAN	CLSTN1	Calsyntenin-1	92500000	113000000	115000000	118000000	96900000	106000000	104000000	94600000	104000000	58200000	62200000	78100000	119000000	82600000	97700000	80500000	90100000	96300000	104000000	87100000	75300000	83300000	80100000	84700000	90400000	66800000	72300000	86800000	74500000	72000000	80200000	78900000	72600000	96100000	80400000	86500000	73800000	79400000	71900000	77600000	78100000	89000000	91800000	94100000	111000000
O95428	O95428	PPN_HUMAN	PAPLN	Papilin	7620000	7850000	8490000	7480000	11700000	7410000	8710000	8940000	7810000	7040000	7720000	9450000	5380000	8320000	7140000	9590000	7540000	10100000	8950000	8790000	10100000	7800000	9240000	6420000	6870000	11100000	9540000	9670000	11000000	10700000	10600000	10600000	10000000	8120000	7330000	5540000	7270000	12600000	11500000	11100000	11500000	11000000	12900000	13000000	11200000
O95445	O95445	APOM_HUMAN	APOM	Apolipoprotein M	4520000	4270000	5800000	4630000	5720000	4780000	4420000	4120000	3770000	3330000	3130000	3010000	3620000	3400000	3610000	2960000	3130000	3810000	3800000	3520000	3350000	3250000	3370000	3150000	3000000	2920000	2880000	2880000	2650000	2970000	2930000	3250000	2720000	2670000	2870000	2250000	2980000	3630000	3600000	3850000	3790000	4140000	4070000	4240000	4450000
O95479	O95479	G6PE_HUMAN	H6PD	GDH/6PGL endoplasmic bifunctional protein	49100000	47700000	65200000	32700000	46700000	52500000	45700000	38200000	40700000	41400000	44400000	42900000	38400000	38900000	40500000	43100000	44200000	43500000	41300000	36100000	39700000	48300000	39800000	41800000	39600000	40600000	40600000	41700000	48700000	24400000	39300000	44100000	39700000	42600000	24100000	32500000	44000000	42500000	53900000	46800000	46300000	55400000	48100000	46300000	47100000
O95497	O95497	VNN1_HUMAN	VNN1	Pantetheinase	8890000	3240000	9870000	10100000	6240000	6420000	6370000	7450000	4070000	4800000	4370000	4290000	2130000	2360000	2450000	2490000	2640000	2740000	2240000	3360000	2530000	2450000	2640000	1850000	2720000	3360000	2280000	2170000	3220000	3110000	3300000	2670000	3000000	2510000	3130000	6620000	3020000	2830000	3450000	2800000	2470000	2830000	2330000	2560000	2530000
O95810	O95810	CAVN2_HUMAN	CAVIN2	Caveolae-associated protein 2	181000000	159000000	162000000	173000000	230000000	159000000	162000000	141000000	153000000	196000000	165000000	163000000	168000000	142000000	204000000	164000000	184000000	167000000	168000000	160000000	144000000	159000000	141000000	167000000	159000000	122000000	168000000	171000000	190000000	158000000	158000000	168000000	155000000	161000000	154000000	186000000	158000000	157000000	190000000	192000000	187000000	202000000	168000000	183000000	209000000
O95980	O95980	RECK_HUMAN	RECK	Reversion-inducing cysteine-rich protein with Kazal motifs	3530000	1010000	2450000	3680000	1740000	1380000	3180000	1380000	1300000	1560000	1100000	1420000	1360000	1520000	3580000	1540000	3450000	1350000	2090000	2410000	1140000	1400000	3430000	1580000	1280000	1640000	3270000	1360000	1460000	1830000	1060000	3030000	1350000	1450000	1260000	1730000	1480000	1590000	1640000	1670000	4690000	5410000	1640000	2290000	1670000
P00338	P00338	LDHA_HUMAN	LDHA	L-lactate dehydrogenase A chain	14300000	13700000	20700000	11400000	14600000	16100000	15000000	19100000	17900000	10300000	9170000	10000000	7090000	8050000	7830000	8640000	6760000	6940000	9110000	9830000	7010000	8290000	4650000	9180000	5480000	5840000	6750000	6960000	7500000	10300000	5910000	10100000	8580000	9680000	6700000	13300000	8330000	8630000	9260000	8720000	10400000	9450000	7310000	10000000	13200000
P00390	P00390	GSHR_HUMAN	GSR	Glutathione reductase, mitochondrial	5040000	18500000	13600000	16800000	2270000	17200000	16600000	3640000	7350000	16400000	19900000	15300000	13400000	9880000	10900000	11000000	9670000	11000000	10100000	11100000	11200000	11900000	14000000	10700000	8200000	9910000	10700000	9380000	10400000	10300000	8700000	13400000	12200000	8670000	9320000	8360000	11900000	8720000	9980000	8900000	9870000	9740000	9650000	10100000	8420000
P00441	P00441	SODC_HUMAN	SOD1	Superoxide dismutase [Cu-Zn]	11900000	15700000	4590000	4530000		12700000	3650000	10500000	4540000	4710000	3340000	3550000		2240000	2060000	5840000		5350000	8560000	9970000	9480000	1340000			2710000	1810000	2090000		7790000	10700000	10500000	12600000	11200000	14900000	13700000		9250000	9680000	2100000	2020000	1860000	4540000	7780000	10200000	17200000
P00450	P00450	CERU_HUMAN	CP	Ceruloplasmin	155000000	164000000	212000000	171000000	220000000	175000000	171000000	176000000	166000000	161000000	161000000	153000000	127000000	135000000	126000000	133000000	129000000	139000000	125000000	134000000	131000000	134000000	135000000	123000000	108000000	115000000	116000000	115000000	128000000	116000000	118000000	126000000	118000000	115000000	116000000	108000000	131000000	128000000	143000000	135000000	137000000	143000000	136000000	136000000	137000000
P00488	P00488	F13A_HUMAN	F13A1	Coagulation factor XIII A chain	33100000	40400000	45100000	40300000	48600000	39100000	35500000	32700000	36500000	41600000	38600000	32300000	29600000	29800000	28600000	29800000	29300000	29600000	29300000	28300000	25900000	28400000	27700000	25800000	28100000	25900000	27600000	26700000	30300000	26900000	27400000	29400000	28900000	26700000	25800000	25000000	25400000	25600000	24500000	26000000	28200000	29100000	22700000	27300000	32600000
P00491	P00491	PNPH_HUMAN	PNP	Purine nucleoside phosphorylase		1990000	3630000	4000000	3350000	1710000	2100000	1560000	1560000	2110000	2620000	1460000	942801	1200000	1250000	1800000	1200000	1330000	1090000	1300000	1310000	1220000	1290000	1660000	1260000	1020000	1590000	1180000	1430000	1260000	1390000	1430000	1490000	751195	1280000	1490000	1680000	1640000	2040000	1490000	1710000	1900000	1660000	1320000	1180000
P00533	P00533	EGFR_HUMAN	EGFR	Epidermal growth factor receptor	2460000	2640000	16000000	2750000	7790000	2610000	2420000	2660000	2640000	5960000	3240000	2880000	4740000	3830000	4430000	3060000	3930000	4650000	4300000	4990000	4010000	7240000	4720000	5380000	3340000	6680000	3230000	5620000	5340000	4140000	2970000	6740000	3510000	2150000	2760000	2410000	7200000	4040000	4790000	6060000	6000000	5310000	4100000	8290000	8090000
P00558	P00558;P07205	PGK1_HUMAN	PGK1	Phosphoglycerate kinase 1	96000000	114000000	109000000	109000000	20800000	108000000	101000000	104000000	93000000	108000000	118000000	101000000	95500000	108000000	112000000	115000000	100000000	107000000	101000000	97900000	106000000	123000000	107000000	116000000	98100000	103000000	107000000	104000000	103000000	102000000	92200000	101000000	110000000	109000000	97600000	106000000	112000000	108000000	132000000	117000000	111000000	108000000	116000000	110000000	104000000
P00734	P00734	THRB_HUMAN	F2	Prothrombin	27300000	26300000	35200000	28000000	36300000	29900000	28100000	29800000	27700000	23800000	23700000	20900000	20400000	20200000	20400000	20500000	20300000	22100000	21000000	20900000	21100000	21000000	21100000	18800000	22700000	22800000	23300000	23300000	23700000	21700000	22400000	24000000	22100000	20200000	21900000	19400000	24700000	26300000	25600000	26000000	26600000	26900000	28000000	28300000	25400000
P00736	P00736	C1R_HUMAN	C1R	Complement C1r subcomponent	32500000	39000000	47900000	34700000	46100000	40400000	39000000	40500000	38700000	32300000	31000000	30000000	24400000	25800000	23900000	23300000	23200000	25500000	26500000	26100000	25400000	23800000	24600000	23700000	35100000	33000000	33800000	34400000	35200000	35300000	34100000	34600000	31200000	28000000	31700000	25500000	28700000	28200000	28900000	28800000	29000000	31900000	27800000	29900000	31900000
P00738	P00738	HPT_HUMAN	HP	Haptoglobin	154000000	203000000	211000000	167000000	213000000	181000000	175000000	169000000	176000000	184000000	187000000	178000000	80000000	79900000	87900000	86500000	83500000	97300000	84200000	79300000	76600000	84000000	80000000	78600000	126000000	117000000	132000000	133000000	146000000	122000000	125000000	131000000	130000000	118000000	118000000	112000000	205000000	191000000	215000000	195000000	205000000	240000000	218000000	201000000	211000000
P00739	P00739	HPTR_HUMAN	HPR	Haptoglobin-related protein	48200000	56200000	69300000	60300000	73500000	59500000	57800000	63200000	55800000	58300000	62200000	59600000	34900000	41100000	39900000	39300000	38200000	42200000	38200000	41200000	44800000	39300000	42600000	36900000	45700000	50400000	50600000	51200000	54800000	48100000	49400000	52100000	51600000	43900000	50400000	47400000	80400000	88700000	87100000	77500000	85400000	83500000	88100000	89800000	86800000
P00740	P00740	FA9_HUMAN	F9	Coagulation factor IX	41700000	46200000	59000000	42900000	56200000	44000000	46300000	45200000	46200000	43400000	42900000	41000000	36200000	35500000	38600000	35900000	38700000	39600000	36400000	37900000	39900000	37000000	41100000	35300000	39800000	40800000	42900000	43700000	45400000	38800000	40400000	41900000	41200000	35700000	41800000	40700000	41400000	43000000	46500000	45500000	47200000	46200000	41400000	43500000	44100000
P00742	P00742	FA10_HUMAN	F10	Coagulation factor X	19500000	18500000	23400000	20000000	23500000	26600000	16600000	19100000	19400000	20500000	16400000	18300000	13200000	17800000	15300000	17900000	17600000	19300000	18800000	18200000	16200000	17200000	17400000	14600000	16500000	16900000	16900000	15900000	17600000	19700000	17400000	17600000	16100000	16000000	15200000	17400000	16800000	18500000	17200000	18300000	17700000	18000000	17500000	17800000	17200000
P00746	P00746	CFAD_HUMAN	CFD	Complement factor D	369141	431199	630576	352675	530404	438350	478855	418845	442080	327443	279003	328125	374252	403289	351410	398072	358136	467404	361527	403751	353035	346867	396063	405493	300491	349176	401222	342526	342688	427819	366399	399692	336237	274566	281787	337941	409261	347141	470048	416173	397978	453794	480476	425475	368223
P00747	P00747;P08519	PLMN_HUMAN	PLG	Plasminogen	21200000	22900000	27700000	22400000	27600000	23600000	22000000	21800000	21200000	19700000	20500000	18400000	21000000	19200000	20000000	19500000	19200000	22000000	20700000	19800000	19300000	19800000	19900000	18300000	18200000	16200000	18000000	17900000	19100000	16700000	17000000	18200000	16900000	15900000	16400000	15500000	16800000	17900000	17500000	18700000	19200000	18800000	17800000	18600000	18900000
P00748	P00748	FA12_HUMAN	F12	Coagulation factor XII	14300000	14200000	17700000	13900000	18500000	14800000	14400000	15500000	14300000	11200000	10500000	11100000	13200000	11200000	11800000	11300000	11300000	12000000	12300000	12000000	12400000	12100000	11400000	11600000	7250000	7880000	7610000	7670000	8250000	7500000	7740000	8310000	7860000	7480000	8060000	7880000	9160000	8730000	9390000	8890000	9440000	8790000	8690000	9420000	8670000
P00751	P00751	CFAB_HUMAN	CFB	Complement factor B	49000000	52900000	67100000	53500000	68400000	55600000	53100000	49700000	51600000	50600000	57100000	51600000	34000000	36600000	34700000	35400000	34700000	38200000	33800000	36400000	35900000	36500000	35800000	33500000	38700000	37500000	39500000	39600000	43400000	41100000	38000000	39800000	38800000	35000000	36000000	35200000	49500000	45300000	55700000	51400000	52000000	56000000	46800000	48900000	50500000
P00915	P00915	CAH1_HUMAN	CA1	Carbonic anhydrase 1	13700000	16100000	13500000	15900000	19900000	17500000	13900000	14900000	15500000	11900000	13000000	12500000	10800000	11400000	10400000	11400000	11600000	10100000	9630000	10700000	10800000	9070000	10800000	7420000	10900000	12100000	12800000	11200000	12400000	9690000	12200000	11800000	11400000	11900000	11200000	13000000	11100000	10900000	11100000	11200000	10100000	10700000	12100000	12000000	10500000
P00918	P00918	CAH2_HUMAN	CA2	Carbonic anhydrase 2	3760000	4510000	6360000	3590000	5640000	4110000	3880000	5430000	4100000	4210000	4290000	3450000	2230000	2510000	2650000	2660000	2640000	2800000	2570000	2620000	2570000	3020000	2660000	2360000	2950000	3370000	3750000	3220000	3100000	3340000	2950000	3090000	3110000	2630000	2720000	2940000	3580000	3840000	4060000	3840000	4020000	4040000	4050000	4460000	4320000
P01008	P01008	ANT3_HUMAN	SERPINC1	Antithrombin-III	33100000	36300000	48200000	37500000	50600000	38300000	39800000	40500000	36700000	37100000	39200000	36600000	31700000	32500000	32800000	33800000	32700000	35400000	32300000	33200000	34500000	33200000	32000000	30300000	31500000	33500000	31600000	31300000	33800000	32800000	32200000	33900000	32400000	30500000	31900000	29300000	37300000	37900000	36400000	36700000	39100000	36300000	38800000	38000000	36700000
P01009	P01009	A1AT_HUMAN	SERPINA1	Alpha-1-antitrypsin	41000000	45400000	61300000	47300000	61900000	48500000	49700000	41300000	43800000	41600000	46000000	41400000	45500000	45200000	43600000	42800000	42100000	47600000	42800000	43900000	44900000	47600000	45200000	44100000	37400000	36100000	39800000	40600000	44100000	40600000	41600000	39400000	41700000	36600000	37600000	35500000	42300000	46600000	57100000	49500000	49400000	57900000	51100000	48600000	49100000
P01011	P01011	AACT_HUMAN	SERPINA3	Alpha-1-antichymotrypsin	28500000	29100000	43600000	34700000	43100000	35500000	33500000	33800000	31900000	29200000	29800000	27000000	30200000	31600000	31400000	30000000	27800000	30900000	29600000	33200000	35200000	33100000	33600000	30200000	31600000	34700000	35000000	35200000	34000000	35100000	32700000	34700000	32100000	29500000	32800000	29900000	34600000	34900000	33300000	33700000	35100000	38200000	36100000	36000000	34600000
P01019	P01019	ANGT_HUMAN	AGT	Angiotensinogen	22600000	19900000	28600000	21600000	28300000	23000000	24400000	27000000	22600000	20100000	20300000	20300000	18500000	19800000	19100000	19200000	18100000	19900000	20300000	20900000	22300000	18500000	20400000	16500000	15400000	18700000	16800000	16200000	17300000	16700000	17600000	19900000	16500000	14700000	16800000	13500000	21800000	25500000	22400000	22200000	22700000	22600000	24300000	28300000	24400000
P01023	P01023	A2MG_HUMAN	A2M	Alpha-2-macroglobulin	93000000	105000000	132000000	106000000	136000000	108000000	109000000	109000000	107000000	98500000	99900000	95900000	106000000	105000000	108000000	106000000	104000000	111000000	111000000	111000000	112000000	107000000	112000000	96800000	94900000	98400000	96900000	96700000	100000000	96000000	95700000	100000000	94000000	88600000	92700000	80500000	80400000	88500000	89000000	86500000	90500000	85500000	85100000	90000000	84300000
P01024	P01024	CO3_HUMAN	C3	Complement C3	154000000	156000000	212000000	168000000	212000000	169000000	166000000	171000000	163000000	146000000	146000000	143000000	94200000	99800000	95800000	94900000	93900000	102000000	100000000	103000000	105000000	98800000	99900000	90200000	132000000	141000000	139000000	138000000	144000000	139000000	135000000	149000000	136000000	129000000	136000000	120000000	133000000	136000000	141000000	142000000	147000000	143000000	135000000	141000000	135000000
P01031	P01031	CO5_HUMAN	C5	Complement C5	43900000	49200000	62300000	49600000	62700000	49000000	49500000	48700000	47600000	49200000	47900000	45600000	37200000	38700000	36000000	35900000	38400000	40700000	39100000	39100000	39100000	38500000	38800000	35200000	42000000	41200000	40600000	41500000	42100000	39400000	40300000	44700000	41600000	39900000	41300000	35700000	44600000	45200000	46800000	50700000	50900000	51100000	49800000	50600000	50800000
P01033	P01033	TIMP1_HUMAN	TIMP1	Metalloproteinase inhibitor 1	7960000	1660000	3600000	7170000	3950000	5860000	4880000	5750000	1460000	8330000	3810000	1550000	6130000	4840000	5540000	6050000	5170000	4110000	6510000	6830000	6930000	8150000	6060000	4330000	4420000	6810000	4900000	4800000	5730000	7460000	6750000	7400000	6810000	6370000	6450000	6630000	3240000	1590000	5990000	6410000	6320000	7170000	5680000	6380000	5850000
P01034	P01034	CYTC_HUMAN	CST3	Cystatin-C	6340000	1110000	3160000	3180000	4220000	2430000	2230000	3070000	2390000	4090000	2220000	3290000	2700000	3930000	1160000	1710000	2640000	3590000	2840000	3200000	1950000	1640000	1420000	3170000	2230000	2300000	2600000	2150000	2020000	2230000	1710000	1950000	2000000	3360000	2050000	3920000	1690000	2030000	2460000	4340000	2400000	2640000	1830000	2520000	2660000
P01040	P01040	CYTA_HUMAN	CSTA	Cystatin-A	27700000	27400000	9940000	26800000	2460000	6800000	26500000	7800000	25600000	26100000	28000000	29100000	27600000	24400000	30800000	26000000	26200000	27800000	27600000	21400000	29200000	27400000	27900000	25400000	29100000	28800000	30900000	30100000	30700000	24300000	26900000	32400000	30900000	28000000	30400000	31700000	26500000	25600000	26100000	24500000	14100000	16200000	24700000	11800000	21500000
P01042	P01042	KNG1_HUMAN	KNG1	Kininogen-1	17700000	19700000	26000000	20900000	27400000	22400000	22100000	21500000	21400000	21600000	21800000	19900000	18200000	17500000	17300000	17900000	16700000	18600000	17800000	17800000	17500000	18700000	18100000	17400000	17800000	17200000	18800000	18300000	19200000	17800000	17200000	17600000	17700000	16400000	16900000	14800000	19800000	18600000	20500000	18400000	18800000	18900000	18800000	19100000	18400000
P01344	P01344	IGF2_HUMAN	IGF2	Insulin-like growth factor II	208339	252467	279562	212001	251369	217935	228969	235367	216660	171404	178906	166505	189160	186337	192035	188979	161469	182593	206688	201074	181186	175799	202706	173747	141031	143964	156334	144843	151003	126001	139240	153661	141578	126537	144231	140534	202424	216658	230583	205843	205112	197570	222498	202095	222642
P01591	P01591	IGJ_HUMAN	JCHAIN	Immunoglobulin J chain	3390000	4010000	5240000	3970000	4890000	3940000	3860000	3860000	4070000	3880000	3690000	3460000	5550000	4790000	5280000	5000000	4880000	5090000	5210000	5060000	4600000	4870000	4860000	4340000	2420000	2270000	2360000	2360000	2550000	2410000	2200000	2450000	2350000	2040000	2270000	1970000	5320000	6370000	5590000	5430000	5410000	5350000	8470000	7180000	7110000
P01593;P01594	P01593;P01594	KV133_HUMAN;KVD33_HUMAN	IGKV1-33;IGKV1D-33	Immunoglobulin kappa variable 1D-33	1970000	2020000	2850000	2320000	3150000	2640000	2020000	2480000	2130000	1470000	1140000	1130000	4630000	4170000	4870000	5110000	4130000	4620000	4220000	4400000	4910000	5240000	4860000	3470000	2200000	2630000	2780000	2460000	2490000	2360000	2750000	2640000	2170000	2000000	2500000	1520000	2540000	2540000	2510000	2560000	2050000	2440000	3000000	2990000	2470000
P01597;P04432	P01597;P04432	KV139_HUMAN;KVD39_HUMAN	IGKV1-39;IGKV1D-39	Immunoglobulin kappa variable 1-39	1560000	1840000	1930000	1830000	1650000	1780000	2640000	3000000	2330000	1610000	1740000	1520000	2660000	2690000	2660000	3190000	2560000	2720000	2940000	3180000	3030000	2830000	3010000	2620000	3020000	3260000	2800000	2820000	2720000	3310000	2880000	2950000	2700000	2870000	3090000	2420000	2530000	2660000	2590000	2560000	2490000	2410000	2850000	2740000	2410000
P01599	P01599	KV117_HUMAN	IGKV1-17	Immunoglobulin kappa variable 1-17	62320.4	63261	81846.9	69486.6	78433.3	53999.5	58078.9	76127.4					133010	108334	132270	115231	106165	137193	140481	113539	109179	102042	119970	103734	105490	86119.8	118232	95622	95149.3	112296	86341.9	79446.5	100060	68226.2	93925	51139.1	65629.1	130905		81307.5	73638.2		142101	122121	104016
P01601	P01611;P01601;A0A0C4DH73	KVD16_HUMAN	IGKV1D-16	Immunoglobulin kappa variable 1D-16	656839	771202	1090000	904726	1170000	921828	947870	1270000	973107	897128	877576	683832	1190000	1170000	1200000	1270000	1100000	1150000	1220000	1180000	1240000	1170000	1300000	974935	1360000	1510000	1660000	1490000	1480000	1430000	1570000	1460000	1370000	1260000	1390000	1190000	1360000	1290000	1360000	1210000	1230000	1170000	1500000	1350000	1220000
P01602	P01602	KV105_HUMAN	IGKV1-5	Immunoglobulin kappa variable 1-5	1440000	1560000	1930000	1750000	1820000	1720000	1700000	2130000	1810000	1480000	1650000	1180000	2360000	2250000	2320000	2090000	2170000	2330000	2310000	2580000	2270000	2410000	2330000	1830000	2090000	2160000	2300000	2230000	2320000	2090000	2250000	2170000	2070000	1900000	2040000	1760000	1670000	1800000	1640000	1600000	1800000	1650000	2000000	1920000	2000000
P01619	P01619	KV320_HUMAN	IGKV3-20	Immunoglobulin kappa variable 3-20	26900000	27100000	36200000	31200000	38000000	30900000	29700000	37500000	30400000	23500000	25200000	18400000	41300000	36900000	37900000	35800000	33400000	35400000	38400000	37200000	38900000	34200000	42100000	31100000	33600000	38400000	40000000	37700000	34300000	36700000	37000000	39000000	32200000	31600000	37600000	28200000	26500000	31000000	24900000	27400000	28400000	25600000	33400000	32500000	29400000
P01700	P01700	LV147_HUMAN	IGLV1-47	Immunoglobulin lambda variable 1-47	1990000	2710000	2940000	2410000	3000000	2360000	2170000	2270000	2140000	2140000	2510000	2010000	1070000	1140000	1550000	1280000	1270000	1260000	930550	998127	1290000	1360000	1160000	1220000	1010000	960786	1050000	1100000	1290000	1150000	943254	1070000	1190000	971199	1070000	1100000	1380000	1150000	1610000	1490000	1210000	1220000	1210000	1290000	1450000
P01701	P01701	LV151_HUMAN	IGLV1-51	Immunoglobulin lambda variable 1-51	9440000	12000000	10300000	7980000	10500000	8020000	7930000	7360000	8180000	10300000	7610000	7080000	4730000	8510000	7910000	7130000	8460000	7980000	7260000	7230000	7030000	7470000	7610000	7370000	9270000	8270000	9070000	9300000	10100000	8830000	8720000	9580000	9370000	9250000	9860000	9840000	7290000	7200000	9590000	8200000	8290000	8550000	7290000	7780000	7790000
P01703	P01703	LV140_HUMAN	IGLV1-40	Immunoglobulin lambda variable 1-40	2010000	1290000	2990000	1340000	3230000	2340000	2300000	1960000	2060000	2660000	2740000	1570000	2040000	1980000	2030000	2080000	2360000	2150000	1830000	1700000	1980000	2240000	1870000	2240000	1860000	1740000	2010000	1880000	2040000	1840000	1940000	2020000	1970000	1930000	1870000	2130000	1820000	1590000	1750000	1780000	1770000	1710000	1640000	2800000	1650000
P01704	P01704	LV214_HUMAN	IGLV2-14	Immunoglobulin lambda variable 2-14	1980000	1180000	1120000	1070000	1020000	1480000	868016	867345	852059	1100000	1820000	1590000	1100000	1130000	1220000	1210000	1280000	926553	1040000	1640000	885761	1600000	1690000	1610000	718691	586708	711497	910548	990892	535583	911517	1010000	692508	625174	866831	760996	763163	939269	1110000	591171	614993	703347	743265	608185	772786
P01706	P01706	LV211_HUMAN	IGLV2-11	Immunoglobulin lambda variable 2-11	114184	172972	183268	148913	213587	144561	167659	231899	114263	115380	195597	217846	212199	203262	255722	256506	249959	249558	238528	245876	234481	241107	247514	204115	137211	142542	134987	155708	160279	128143	167584	143269	148915	142427	158636	130921	120326	168729	133462	126244	149844	128662	163050	145714	165114
P01714	P01714	LV319_HUMAN	IGLV3-19	Immunoglobulin lambda variable 3-19	820108	941615	1050000	813812	1010000	840902	818746	868458	823978	891697	928583	852478	1390000	1400000	1530000	1290000	1380000	1490000	1390000	1540000	1570000	1510000	1640000	1230000	1200000	1140000	1340000	1330000	1030000	1290000	1210000	1290000	1230000	1030000	1220000	1180000	890515	923958	1040000	942408	973673	1030000	1100000	1020000	974886
P01715	P01715	LV301_HUMAN	IGLV3-1	Immunoglobulin lambda variable 3-1	169657	199443	194403	186825	212987	182625	180837	158191	142030	148518	167558	146928	286048	277620	274954	326101	287863	268147	281698	285719	278930	294386	264424	271380	160572	195445	157928	137790	146002	148121	158951	193466	141474	139575	158696	191737	153232	132175	117593	109463	110719	115315	134527	147342	160436
P01717	P01717	LV325_HUMAN	IGLV3-25	Immunoglobulin lambda variable 3-25	5560000	6590000	7160000	5870000	7340000	5400000	5890000	5940000	5600000	5390000	5690000	5190000	11500000	10400000	11100000	11100000	12000000	13300000	12600000	11700000	12500000	12400000	12200000	10800000	10100000	9580000	9680000	9990000	10200000	9200000	9490000	9980000	9130000	8640000	8860000	8810000	7960000	12800000	7890000	7960000	7400000	7440000	15200000	14600000	12500000
P01742	P01742	HV169_HUMAN	IGHV1-69	Immunoglobulin heavy variable 1-69	9830000	11100000	10800000	9560000	11800000	11000000	9300000	10100000	8240000	7000000	5500000	5420000	7190000	8820000	8280000	8310000	9280000	8360000	9630000	9230000	7840000	8460000	8560000	6660000	10300000	9890000	9850000	10000000	10400000	10100000	9500000	10700000	9210000	9250000	9870000	8570000	6660000	8700000	6370000	7840000	7470000	7610000	8990000	9250000	9410000
P01743	P01743	HV146_HUMAN	IGHV1-46	Immunoglobulin heavy variable 1-46	115683	54957.2	74094	200580	113658	207252	213336	267592	194271	110893	64795.5		286835	398212	390476	466152	401103	528215	523090	512776	748698	406333	552406	338180	292927	330758	446677	332141	357163	388006	389205	426109	274338	208678	252389	127518	132166	279723	213812	292508	270930	246143	285901	385284	262094
P01766	P01766	HV313_HUMAN	IGHV3-13	Immunoglobulin heavy variable 3-13	909537	1100000	612330	1000000	698108	1060000	1100000	980653	1000000	796939	803145	772505	1510000	1180000	1130000	1200000	1150000	1310000	1160000	1070000	935989	1110000	1080000	978722	564377	541279	579761	556019	707725	490661	580420	623312	611652	639256	528967	515026	753145	779434	785038	812172	896247	862018	844107	862896	1160000
P01768;P0DP03	P01768;P01772;P0DP02;P0DP03	HV330_HUMAN;HVC05_HUMAN	IGHV3-30;IGHV3-30-5	Immunoglobulin heavy variable 3-30	3650000	4020000	4960000	4220000	4870000	3960000	3960000	3790000	4120000	2470000	1600000	1580000	5510000	4720000	5500000	4390000	4860000	5090000	5880000	5030000	4510000	4560000	4910000	4190000	4620000	3700000	3670000	4100000	4040000	4080000	3220000	4360000	3230000	3550000	3900000	3100000	2520000	3760000	2630000	3020000	3010000	3290000	3710000	4240000	4720000
P01780	P01780	HV307_HUMAN	IGHV3-7	Immunoglobulin heavy variable 3-7	23000000	28200000	39800000	31200000	34900000	27400000	31600000	23900000	28900000	20800000	19400000	16500000	37500000	32100000	35000000	33800000	34300000	35300000	36400000	32900000	30500000	30200000	34100000	32000000	24200000	19100000	20600000	21800000	21900000	20300000	19200000	21800000	19300000	20300000	22500000	17600000	19200000	25400000	19100000	21000000	21200000	21000000	28400000	27300000	29800000
P01782;P0DP04	P01782;P0DP04	HV309_HUMAN;HV43D_HUMAN	IGHV3-43D;IGHV3-9	Immunoglobulin heavy variable 3-9	23500000	29700000	35500000	21900000	24000000	23100000	30800000	22900000	23400000	19900000	15200000	21400000	16200000	18200000	16500000	17400000	17900000	15500000	18200000	15700000	15700000	13900000	16400000	14900000	13900000	14300000	12600000	13300000	15100000	14500000	15200000	15300000	17900000	15600000	14600000	19100000	14800000	18900000	14700000	15200000	18000000	19100000	14900000	17400000	15800000
P01817	P01817	HV205_HUMAN	IGHV2-5	Immunoglobulin heavy variable 2-5	954442	3800000	5460000	2410000	3330000	2400000	1600000	3350000	3120000	1810000	1920000	1500000	1430000	1230000	1580000	1340000	1180000	1490000	1180000	1730000	1600000	1140000	1490000	1140000	1600000	1510000	2680000	1720000	1760000	1660000	1490000	1610000	1430000	1220000	1410000	1470000	1840000	1680000	1880000	1250000	1650000	1570000	1570000	1210000	1580000
P01834	P01834;P0DOX7	IGKC_HUMAN	IGKC	Immunoglobulin kappa constant	98100000	128000000	143000000	108000000	145000000	114000000	107000000	119000000	121000000	122000000	127000000	117000000	168000000	175000000	169000000	196000000	176000000	186000000	175000000	171000000	176000000	178000000	177000000	151000000	109000000	131000000	127000000	130000000	148000000	123000000	130000000	129000000	138000000	129000000	121000000	108000000	140000000	150000000	158000000	153000000	152000000	154000000	159000000	158000000	167000000
P01857	P01857;P01860;P01861;P0DOX5	IGHG1_HUMAN	IGHG1	Immunoglobulin heavy constant gamma 1	191000000	202000000	267000000	222000000	275000000	217000000	215000000	230000000	207000000	197000000	215000000	202000000	230000000	234000000	240000000	253000000	228000000	260000000	243000000	241000000	260000000	255000000	256000000	212000000	218000000	241000000	241000000	232000000	243000000	217000000	236000000	242000000	234000000	221000000	218000000	211000000	197000000	202000000	213000000	192000000	197000000	190000000	207000000	200000000	194000000
P01859	P01857;P01859;P0DOX5	IGHG2_HUMAN	IGHG2	Immunoglobulin heavy constant gamma 2	196000000	234000000	278000000	232000000	287000000	231000000	238000000	251000000	242000000	207000000	224000000	205000000	285000000	319000000	304000000	309000000	311000000	332000000	322000000	317000000	327000000	323000000	325000000	287000000	166000000	176000000	178000000	174000000	176000000	162000000	178000000	183000000	174000000	165000000	175000000	166000000	170000000	189000000	197000000	189000000	186000000	180000000	198000000	197000000	190000000
P01860	P01860	IGHG3_HUMAN	IGHG3	Immunoglobulin heavy constant gamma 3	4060000	4650000	5370000	4540000	5920000	4180000	4700000	4710000	4210000	4270000	4300000	4020000	7010000	7280000	7660000	8130000	6960000	8590000	7710000	7260000	8140000	7550000	7850000	6390000	7610000	8470000	8620000	8360000	9470000	8570000	8800000	8920000	8340000	7220000	8100000	6290000	2380000	3560000	3020000	3260000	2830000	2790000	3030000	2760000	3010000
P01861	P01861	IGHG4_HUMAN	IGHG4	Immunoglobulin heavy constant gamma 4	9410000	14000000	16200000	11800000	17400000	12800000	13000000	14400000	13000000	13300000	12600000	12800000	14900000	17200000	17700000	19700000	17600000	19900000	17000000	16600000	19000000	19100000	18000000	15800000	16900000	22700000	23700000	21400000	27500000	18300000	22700000	22700000	23100000	20500000	20100000	19900000	13200000	14700000	15600000	13900000	15300000	14700000	15200000	13500000	13600000
P01871	P01871;P0DOX6	IGHM_HUMAN	IGHM	Immunoglobulin heavy constant mu	207000000	250000000	275000000	213000000	277000000	229000000	215000000	230000000	234000000	219000000	209000000	189000000	195000000	182000000	188000000	176000000	193000000	193000000	199000000	182000000	180000000	189000000	186000000	174000000	88800000	79100000	82600000	84200000	86700000	80400000	80100000	87200000	84000000	84500000	83900000	78200000	152000000	266000000	169000000	169000000	168000000	167000000	340000000	299000000	289000000
P01876	P01876	IGHA1_HUMAN	IGHA1	Immunoglobulin heavy constant alpha 1	23100000	29000000	35500000	26600000	35800000	28600000	28200000	28300000	29400000	28800000	30000000	27700000	99900000	97300000	96100000	101000000	99600000	99300000	103000000	99400000	95500000	96500000	96400000	93300000	43700000	47000000	43800000	42600000	45800000	43800000	43900000	47500000	47800000	45300000	45700000	42700000	61400000	64000000	62000000	56100000	59700000	58300000	68800000	61000000	60100000
P01877	P01877;P0DOX2	IGHA2_HUMAN	IGHA2	Immunoglobulin heavy constant alpha 2	6900000	8320000	12100000	8780000	11500000	8820000	7350000	10600000	8710000	10200000	12000000	10700000	23200000	27500000	23200000	25800000	22400000	16700000	21300000	25700000	18600000	20100000	21100000	28300000	11900000	15000000	13300000	12400000	13300000	12900000	13300000	14300000	15700000	15000000	15500000	16100000	20800000	22800000	19600000	16800000	18000000	16500000	22500000	17900000	16300000
P01880	P01880;P0DOX3	IGHD_HUMAN	IGHD	Immunoglobulin heavy constant delta	1970000	3110000	2400000	4660000	2610000	4420000	2890000	1850000	2610000	2840000	3260000	2650000	4420000	4690000	4480000	4900000	4370000	5130000	4880000	4760000	4610000	4600000	4710000	4830000	4840000	4420000	4210000	4630000	4360000	4280000	4540000	4840000	4630000	4130000	4510000	3960000	6080000	4930000	4950000	5160000	5220000	5310000	5810000	5090000	5460000
P01889	P01889	HLAB_HUMAN	HLA-B	HLA class I histocompatibility antigen, B alpha chain	495747	684729	819180	724975	721204	709451	564063	462941	605075	425247	307059	380935	404541	311208	367570	283204	326757	307786	331576	300188	245365	322681	236675	285108	416271	291324	347560	371690	358322	360193	320850	320072	267494	333364	264882	350456	254410	256108	259890	319259	285975	306283	232892	261422	505937
P02144	P02144	MYG_HUMAN	MB	Myoglobin	210000000	236000000	273000000	171000000	277000000	207000000	221000000	197000000	172000000	210000000	214000000	226000000	195000000	163000000	185000000	143000000	167000000	167000000	160000000	177000000	183000000	116000000	161000000	201000000	163000000	192000000	196000000	195000000	172000000	166000000	122000000	186000000	208000000	186000000	206000000	215000000	226000000	168000000	208000000	170000000	169000000	195000000	202000000	113000000	189000000
P02452	P02452	CO1A1_HUMAN	COL1A1	Collagen alpha-1(I) chain	2250000	1930000	2620000	2190000	2450000	2000000	1830000	1830000	1710000	1450000	1260000	1580000	1440000	1320000	1530000	1330000	1490000	1200000	1230000	1340000	1350000	1470000	1400000	1360000	1370000	1300000	1380000	1270000	1490000	986585	1190000	1470000	1250000	1050000	1430000	1250000	1340000	1130000	1440000	1260000	1290000	1290000	1180000	1410000	1240000
P02533	P02533;P08779;P13645;Q7Z3Y7;Q7Z3Y8;Q7Z3Y9;Q7Z3Z0	K1C14_HUMAN	KRT14	Keratin, type I cytoskeletal 14	75700000	63600000	78500000	76200000	83100000	70000000	61400000	48700000	57900000	47100000	55800000	49900000	63400000	60100000	52900000	56400000	59400000	61300000	59400000	59100000	56600000	59000000	54900000	57000000	54700000	42100000	50600000	52700000	53800000	54600000	46100000	53300000	48600000	53000000	49300000	48900000	47300000	53900000	56300000	57100000	58000000	68800000	54900000	58900000	66500000
P02538	P02538;P04259;P12035;P48668	K2C6A_HUMAN	KRT6A	Keratin, type II cytoskeletal 6A	6920000	12400000	4790000	5440000	6850000	6460000	5780000	5740000	7260000	3150000	3700000	5580000	6420000	6080000	5410000	6960000	6980000	6740000	4560000	5040000	4740000	4980000	5680000	6970000	4660000	3540000	4630000	4640000	5190000	4770000	4160000	4230000	4580000	5750000	4850000	6700000	5410000	5150000	5560000	5730000	5380000	6480000	5550000	5620000	3570000
P02647	P02647	APOA1_HUMAN	APOA1	Apolipoprotein A-I	193000000	217000000	283000000	217000000	290000000	233000000	222000000	204000000	213000000	216000000	213000000	199000000	233000000	225000000	206000000	215000000	218000000	229000000	224000000	220000000	221000000	238000000	224000000	208000000	166000000	156000000	174000000	173000000	187000000	163000000	174000000	170000000	160000000	157000000	158000000	144000000	172000000	188000000	176000000	166000000	167000000	173000000	168000000	196000000	196000000
P02649	P02649	APOE_HUMAN	APOE	Apolipoprotein E	8380000	7210000	10600000	8830000	9980000	8720000	7220000	6070000	6980000	5170000	4820000	4670000	6000000	4330000	5470000	4880000	5900000	5620000	6560000	5200000	4500000	4870000	5400000	5140000	5490000	6090000	4970000	5680000	5060000	5040000	4360000	6060000	4480000	4700000	5020000	4580000	3690000	4370000	4170000	5100000	4730000	5050000	4300000	5170000	5500000
P02652	P02652	APOA2_HUMAN	APOA2	Apolipoprotein A-II	90300000	117000000	142000000	115000000	144000000	123000000	117000000	110000000	125000000	139000000	128000000	122000000	82300000	76200000	83900000	80200000	78400000	89200000	88500000	79900000	83500000	82400000	80900000	79200000	91900000	93800000	94500000	89800000	97300000	89200000	91100000	96600000	92600000	94900000	91900000	100000000	92900000	86800000	92500000	91100000	97300000	92700000	81700000	87500000	90600000
P02654	P02654	APOC1_HUMAN	APOC1	Apolipoprotein C-I	4320000	6100000	5730000	5780000	8940000	7040000	5820000	5680000	4700000	5650000	6140000	5630000	4070000	3660000	2170000	3510000	4520000	4480000	3920000	4150000	2570000	3820000	4330000	3980000	4350000	4480000	3710000	4180000	4940000	4130000	4250000	5200000	4550000	4980000	5020000	4540000	4040000	4480000	2540000	3510000	4540000	3880000	4120000	4650000	3390000
P02655	P02655	APOC2_HUMAN	APOC2	Apolipoprotein C-II	7260000	8050000	7100000	5190000	7860000	7400000	6240000	6770000	6920000	7280000	8170000	7220000	2860000	2670000	2370000	2560000	2700000	2930000	2580000	2700000	2940000	2950000	3200000	2440000	3530000	4440000	3510000	3420000	4000000	3120000	3110000	4640000	3970000	3420000	3590000	4600000	3160000	3990000	3370000	2340000	3390000	3590000	3810000	4200000	3810000
P02656	P02656	APOC3_HUMAN	APOC3	Apolipoprotein C-III	87300000	92100000	91100000	68000000	90900000	76500000	79700000	82300000	81400000	73100000	84300000	69300000	56100000	51800000	50400000	48700000	52900000	49300000	56900000	53000000	48600000	55200000	55300000	48700000	50500000	55800000	46300000	44800000	54400000	47600000	49600000	63800000	49500000	45700000	58100000	59000000	40600000	45700000	40600000	33800000	41500000	40100000	43200000	49100000	42700000
P02671	P02671	FIBA_HUMAN	FGA	Fibrinogen alpha chain	437000000	478000000	640000000	528000000	628000000	512000000	485000000	456000000	478000000	477000000	416000000	441000000	389000000	373000000	400000000	327000000	361000000	358000000	356000000	407000000	374000000	391000000	398000000	370000000	449000000	418000000	414000000	457000000	453000000	482000000	397000000	475000000	418000000	418000000	444000000	379000000	344000000	347000000	307000000	401000000	385000000	386000000	332000000	352000000	458000000
P02675	P02675	FIBB_HUMAN	FGB	Fibrinogen beta chain	103000000	115000000	162000000	132000000	172000000	135000000	129000000	130000000	130000000	139000000	135000000	133000000	106000000	102000000	111000000	101000000	96700000	101000000	96300000	110000000	108000000	116000000	115000000	108000000	124000000	119000000	126000000	126000000	127000000	129000000	112000000	128000000	120000000	115000000	124000000	119000000	115000000	100000000	102000000	112000000	109000000	110000000	95200000	99100000	121000000
P02679	P02679	FIBG_HUMAN	FGG	Fibrinogen gamma chain	58900000	67600000	86700000	69600000	89600000	69900000	66400000	67600000	66600000	63200000	57800000	62600000	55400000	51100000	60800000	51200000	49300000	50800000	46600000	56000000	55300000	56000000	56500000	51400000	63600000	58200000	65000000	65900000	66200000	66800000	58000000	66500000	61100000	58200000	61300000	56100000	58500000	51300000	56200000	59200000	58300000	58100000	50000000	52300000	64300000
P02741	P02741	CRP_HUMAN	CRP	C-reactive protein	245014	219211	241386	200264	251954	331672	308407	174547	177731	171836	160865	315190	10594.8	10440.1		41337.6	16557.5		18057	65196.7	15465.3	33895.3	23683.6	32858.4	63512.4	80987.9	68231.7	66139.7	58408.5	242641	100718	73232.9	74577.6	58407.3	63138.7	170023	294558	40685	96599.6	77345.8	125211	884923	25206.8	45078.6	58343.5
P02743	P02743	SAMP_HUMAN	APCS	Serum amyloid P-component	8500000	6440000	10100000	8310000	9060000	7960000	7290000	8200000	7260000	9110000	10000000	8830000	3430000	4100000	3700000	3730000	4360000	3850000	4720000	4770000	3910000	3650000	4050000	3730000	7580000	9260000	4980000	5660000	4980000	7960000	6370000	8930000	6300000	7060000	8510000	6670000	5410000	7690000	4750000	7420000	6580000	6470000	7410000	7900000	6780000
P02745	P02745	C1QA_HUMAN	C1QA	Complement C1q subcomponent subunit A	2520000	3530000	3280000	2690000	4250000	3100000	2870000	3010000	3030000	2490000	2700000	2100000	1960000	2360000	2090000	2140000	2140000	2050000	2030000	2090000	1790000	2050000	1790000	1870000	2510000	2160000	2280000	2390000	2740000	2380000	2420000	2460000	2250000	2280000	2150000	2060000	1660000	2090000	2020000	2190000	2220000	2180000	1790000	2280000	2500000
P02746	P02746	C1QB_HUMAN	C1QB	Complement C1q subcomponent subunit B	3970000	4190000	4950000	4360000	5970000	3880000	4460000	5100000	3960000	3610000	4400000	3510000	3130000	3530000	2420000	2910000	3080000	3530000	3540000	3640000	3390000	3530000	4090000	3300000	4460000	4590000	4220000	4270000	4600000	4510000	4210000	4800000	3830000	3820000	4320000	3410000	3200000	3820000	2850000	3770000	3940000	3560000	3680000	4110000	3320000
P02747	P02747	C1QC_HUMAN	C1QC	Complement C1q subcomponent subunit C	17100000	19300000	22500000	20200000	22500000	18500000	19400000	18000000	19100000	18300000	18900000	17300000	14100000	14900000	12800000	12900000	14100000	14400000	14800000	14200000	13900000	14700000	15100000	13600000	19200000	16400000	17400000	18800000	19300000	17800000	17500000	18200000	17000000	16300000	17500000	17000000	12500000	15000000	14000000	15800000	16000000	15600000	14300000	16400000	15500000
P02748	P02748	CO9_HUMAN	C9	Complement component C9	7420000	8450000	10400000	8050000	10300000	8400000	7990000	7710000	8000000	7230000	6790000	6800000	5750000	5820000	5070000	5400000	5490000	5960000	5410000	5970000	6040000	6050000	5990000	5630000	5990000	6340000	6540000	6660000	7080000	6440000	6240000	6750000	6180000	6080000	6230000	5770000	7930000	7330000	7960000	8410000	8740000	9710000	7670000	7800000	7860000
P02749	P02749	APOH_HUMAN	APOH	Beta-2-glycoprotein 1	10500000	10400000	14500000	11500000	14500000	12000000	12800000	13300000	12200000	10300000	11300000	11500000	19500000	18800000	19300000	20400000	18100000	20900000	18300000	20100000	19300000	19100000	20600000	18500000	21600000	21800000	24400000	24300000	24500000	23400000	23400000	21400000	20100000	19400000	21300000	17800000	23600000	23500000	24700000	21600000	22200000	22400000	22500000	23300000	21600000
P02750	P02750	A2GL_HUMAN	LRG1	Leucine-rich alpha-2-glycoprotein	4720000	4840000	6570000	5390000	7780000	5620000	5180000	4760000	4880000	4350000	4520000	4590000	3580000	3950000	3660000	3850000	3680000	4060000	3540000	3880000	3750000	3580000	3870000	3670000	4240000	3920000	4400000	4410000	4790000	4650000	5170000	4300000	3790000	3790000	3860000	3820000	4690000	4630000	5320000	5390000	5480000	6990000	5360000	5180000	5390000
P02751	P02751	FINC_HUMAN	FN1	Fibronectin	35600000	35300000	62500000	49400000	68300000	45200000	50400000	46300000	36300000	37400000	32700000	35600000	21900000	33400000	48400000	27000000	26500000	30100000	25200000	35500000	42500000	34900000	36900000	33400000	29000000	28000000	21500000	26300000	25100000	40400000	25200000	27700000	29500000	23000000	26600000	20800000	36800000	38500000	34200000	48400000	31500000	30300000	35700000	41200000	59700000
P02753	P02753	RET4_HUMAN	RBP4	Retinol-binding protein 4	4100000	4560000	4970000	4150000	4760000	4500000	3790000	4170000	4330000	3600000	4000000	3990000	4480000	3960000	4940000	4860000	4220000	4810000	4700000	4300000	4020000	3960000	4050000	3880000	4390000	3830000	4560000	4450000	4700000	4050000	3990000	4520000	4190000	4090000	4010000	3720000	3880000	4070000	4740000	4260000	4370000	4320000	3750000	4250000	4730000
P02760	P02760	AMBP_HUMAN	AMBP	Protein AMBP	39200000	41200000	55700000	42000000	58500000	43700000	41400000	44500000	40900000	37200000	40600000	37500000	45300000	40100000	45200000	42600000	37900000	47800000	41000000	43900000	43700000	44800000	45000000	39600000	39200000	34300000	42100000	39800000	40400000	38000000	39700000	40600000	35400000	31300000	34700000	33000000	46100000	41900000	51300000	45100000	44000000	44900000	44700000	45900000	44000000
P02763	P02763	A1AG1_HUMAN	ORM1	Alpha-1-acid glycoprotein 1	36200000	46800000	54900000	45400000	64500000	45900000	50500000	58400000	50300000	44100000	46500000	44900000	20300000	25800000	23200000	25200000	23000000	25700000	24000000	25000000	26800000	26100000	25200000	22600000	31600000	41000000	36100000	36100000	39200000	39000000	36200000	37600000	38300000	35300000	36100000	31700000	40000000	40700000	39800000	38200000	39400000	43600000	43900000	40500000	37000000
P02765	P02765	FETUA_HUMAN	AHSG	Alpha-2-HS-glycoprotein	67700000	66600000	86200000	63100000	87200000	63200000	61500000	61200000	59200000	61400000	65000000	55800000	73500000	68900000	70900000	71700000	72900000	75900000	64500000	65800000	66000000	71900000	69300000	67300000	72600000	63800000	78800000	75500000	76900000	72600000	70200000	70200000	71600000	63000000	66400000	63600000	73200000	70000000	79700000	74800000	76400000	76100000	65300000	71900000	68900000
P02766	P02766	TTHY_HUMAN	TTR	Transthyretin	6030000	7670000	5170000	5460000	10100000	5550000	5880000	10000000	5250000	5440000	8580000	6080000	7510000	8170000	4910000	6450000	9020000	7380000	9520000	9530000	6530000	6490000	8660000	6580000	8160000	10200000	5750000	6440000	8070000	5700000	7930000	9430000	5390000	5220000	8640000	4700000	5500000	6330000	3520000	5050000	8410000	3450000	6050000	6820000	4350000
P02768	P02768	ALBU_HUMAN	ALB	Albumin	1700000000	1980000000	2320000000	1910000000	2360000000	1910000000	1870000000	1790000000	1830000000	1840000000	1920000000	1810000000	1790000000	1820000000	1710000000	1860000000	1820000000	1870000000	1810000000	1800000000	1840000000	1830000000	1830000000	1750000000	1660000000	1760000000	1760000000	1800000000	1930000000	1830000000	1790000000	1760000000	1840000000	1870000000	1760000000	1800000000	1840000000	1950000000	1920000000	1840000000	1950000000	1910000000	1960000000	1880000000	1900000000
P02774	P02774	VTDB_HUMAN	GC	Vitamin D-binding protein	96500000	101000000	127000000	104000000	130000000	107000000	105000000	105000000	103000000	95200000	96700000	91300000	84400000	86100000	84200000	85900000	85700000	92800000	86600000	87500000	89500000	89100000	87700000	80700000	80600000	80400000	84400000	82300000	88200000	78500000	83600000	85400000	82400000	76100000	75900000	71600000	89000000	93600000	99500000	96300000	99400000	99900000	92600000	97900000	91200000
P02775	P02775	CXCL7_HUMAN	PPBP	Platelet basic protein	10800000	8510000	17000000	9320000	13600000	18800000	11000000	18400000	11500000	7510000	13100000	1600000	8070000	12600000	4800000	3640000	6190000	8430000	13300000	16900000	6390000	7890000	6030000	4740000	10000000	7430000	7690000	6880000	5060000	5840000	3680000	9820000	6370000	4850000	5690000	4350000	15300000	6930000	6490000	6380000	11100000	19800000	4950000	7580000	31200000
P02776	P02776	PLF4_HUMAN	PF4	Platelet factor 4	236858	287590	608379	250636	366819	783196	445530	845139	300598	239907	476436	85926.5	153312	333860	111198	83627.4	92297.6	258109	519727	627809	129135	186426	96051.9	92989.4	121580	62898.2	116889	64995.7	89550.9	124788	40528.4	266874	124630	51917.3	110650	61071	239409	125158	38645.3	89217.8	447655	713311	41800.3	154130	1010000
P02786	P02786	TFR1_HUMAN	TFRC	Transferrin receptor protein 1	145000000	217000000	180000000	174000000	155000000	187000000	202000000	206000000	157000000	151000000	150000000	153000000	138000000	145000000	154000000	158000000	145000000	176000000	149000000	149000000	155000000	165000000	164000000	150000000	169000000	170000000	193000000	193000000	212000000	195000000	183000000	205000000	187000000	179000000	188000000	171000000	177000000	200000000	194000000	185000000	197000000	182000000	196000000	198000000	174000000
P02787	P02787	TRFE_HUMAN	TF	Serotransferrin	145000000	166000000	203000000	163000000	204000000	165000000	165000000	169000000	168000000	168000000	174000000	153000000	118000000	116000000	118000000	121000000	116000000	127000000	119000000	117000000	123000000	125000000	125000000	116000000	130000000	128000000	142000000	139000000	148000000	131000000	136000000	137000000	136000000	130000000	134000000	126000000	124000000	134000000	136000000	129000000	130000000	130000000	126000000	132000000	133000000
P02788	P02788	TRFL_HUMAN	LTF	Lactotransferrin	4810000	4110000	5710000	5260000	7210000	4590000	4140000	3620000	3660000	3970000	4040000	3750000	3490000	3700000	3720000	3400000	3740000	3640000	3890000	4030000	3950000	3890000	3780000	3380000	3780000	3910000	3390000	3200000	3220000	3810000	3380000	3570000	3490000	3380000	3520000	3820000	3640000	4050000	3110000	3640000	3330000	3460000	3460000	3630000	3570000
P02790	P02790	HEMO_HUMAN	HPX	Hemopexin	380000000	408000000	558000000	430000000	574000000	438000000	465000000	483000000	442000000	424000000	430000000	407000000	363000000	389000000	380000000	414000000	372000000	416000000	391000000	414000000	424000000	412000000	416000000	378000000	426000000	447000000	464000000	461000000	470000000	448000000	465000000	474000000	434000000	416000000	424000000	397000000	490000000	525000000	517000000	488000000	488000000	506000000	545000000	527000000	523000000
P03950	P03950	ANGI_HUMAN	ANG	Angiogenin	140000000	178000000	214000000	150000000	218000000	165000000	123000000	114000000	147000000	134000000	124000000	134000000	145000000	126000000	131000000	115000000	131000000	129000000	125000000	124000000	110000000	120000000	116000000	123000000	134000000	117000000	124000000	139000000	125000000	138000000	114000000	137000000	119000000	134000000	139000000	141000000	108000000	104000000	111000000	117000000	124000000	119000000	111000000	115000000	138000000
P03951	P03951	FA11_HUMAN	F11	Coagulation factor XI	12800000	13300000	15500000	12000000	15600000	13700000	11800000	12300000	12400000	10500000	9650000	9870000	9580000	9190000	8870000	8510000	9850000	10200000	9480000	8370000	8660000	8780000	8910000	8100000	9320000	8460000	8930000	9500000	10300000	9430000	9120000	9600000	9270000	8700000	8510000	8390000	10400000	10700000	10600000	11500000	11800000	12100000	11900000	11300000	11500000
P03952	P03952	KLKB1_HUMAN	KLKB1	Plasma kallikrein	239000000	258000000	309000000	245000000	311000000	257000000	239000000	232000000	237000000	230000000	242000000	221000000	176000000	178000000	180000000	176000000	178000000	199000000	191000000	182000000	184000000	179000000	189000000	162000000	195000000	194000000	199000000	195000000	215000000	189000000	197000000	210000000	191000000	176000000	183000000	174000000	182000000	201000000	202000000	196000000	199000000	198000000	202000000	204000000	211000000
P04003	P04003	C4BPA_HUMAN	C4BPA	C4b-binding protein alpha chain	28700000	35300000	42500000	33700000	44000000	35300000	33600000	33500000	33000000	32000000	30400000	28100000	17800000	17700000	17900000	18700000	18700000	19300000	18600000	18400000	18000000	18900000	18600000	16900000	23700000	23500000	24300000	24000000	25600000	23600000	23700000	25800000	24500000	23200000	23200000	21700000	31100000	29600000	34000000	32000000	32700000	33800000	31200000	31600000	31700000
P04004	P04004	VTNC_HUMAN	VTN	Vitronectin	13700000	13300000	16600000	13500000	17100000	13500000	13000000	13300000	13100000	12600000	11700000	11000000	12200000	12200000	11300000	11100000	10800000	12800000	12000000	12900000	12100000	12000000	12900000	10800000	12600000	11000000	12000000	12300000	13100000	12700000	11800000	12500000	11200000	10300000	11200000	9920000	12800000	14000000	14100000	14400000	14400000	15300000	13900000	15200000	15200000
P04040	P04040	CATA_HUMAN	CAT	Catalase	18100000	21700000	28600000	21900000	24500000	22000000	19400000	15800000	16400000	19000000	17900000	13400000	14800000	14600000	13700000	14500000	14200000	15300000	13300000	17100000	15900000	14900000	15400000	14000000	15100000	12800000	13700000	13900000	16500000	13900000	13900000	14200000	14300000	14200000	15700000	13900000	14700000	15100000	16100000	16100000	15800000	18500000	19800000	16200000	19900000
P04070	P04070	PROC_HUMAN	PROC	Vitamin K-dependent protein C	108000000	116000000	122000000	102000000	123000000	125000000	120000000	122000000	108000000	99700000	103000000	93700000	83700000	92900000	84700000	88600000	86700000	92900000	92400000	93000000	88100000	89000000	92400000	79500000	94500000	95200000	95000000	87900000	87400000	86800000	88200000	94500000	90000000	85100000	93500000	83000000	98600000	112000000	97800000	103000000	96200000	93200000	101000000	106000000	94600000
P04075	P04075	ALDOA_HUMAN	ALDOA	Fructose-bisphosphate aldolase A	3280000	3710000	2520000	3820000	2670000	3150000	3000000	3070000	3570000	3430000	3520000	3730000	3520000	3230000	2900000	2810000	3380000	3320000	3600000	3140000	3610000	3010000	3180000	2990000	3320000	2890000	3020000	2920000	3130000	2980000	3020000	3310000	3030000	3210000	2990000	3290000	3290000	3300000	2870000	2990000	2990000	3520000	3300000	3600000	3930000
P04114	P04114	APOB_HUMAN	APOB	Apolipoprotein B-100	408000000	450000000	403000000	340000000	427000000	344000000	387000000	485000000	462000000	445000000	441000000	403000000	366000000	364000000	338000000	354000000	379000000	374000000	393000000	382000000	367000000	361000000	371000000	332000000	371000000	454000000	356000000	358000000	374000000	342000000	379000000	478000000	412000000	394000000	425000000	365000000	411000000	429000000	410000000	426000000	454000000	394000000	409000000	455000000	425000000
P04179	P04179	SODM_HUMAN	SOD2	Superoxide dismutase [Mn], mitochondrial	7120000	5830000	8140000	5680000	7130000	6250000	5520000	5500000	5260000	4530000	4880000	5820000	3910000	3330000	3840000	3040000	3530000	3490000	3510000	3890000	3560000	3620000	3730000	3830000	5200000	5370000	4880000	5130000	5260000	5300000	4460000	5710000	4820000	5060000	5740000	5770000	5060000	4340000	4710000	4640000	4900000	4530000	3460000	4520000	3920000
P04180	P04180	LCAT_HUMAN	LCAT	Phosphatidylcholine-sterol acyltransferase	4600000	4890000	6090000	4070000	5070000	4690000	3720000	3940000	4410000	3810000	4090000	3850000	4370000	4010000	3790000	3520000	3590000	4100000	3860000	3750000	4050000	3920000	3750000	3810000	3470000	3620000	3580000	3830000	3580000	3600000	3490000	4160000	3720000	3330000	3540000	3540000	3660000	3730000	3850000	3870000	4070000	3900000	3890000	3930000	3990000
P04196	P04196	HRG_HUMAN	HRG	Histidine-rich glycoprotein	5640000	6690000	8060000	6830000	9210000	7190000	7500000	7400000	6830000	5350000	5250000	5480000	6700000	7380000	6850000	7590000	7290000	8220000	7350000	7460000	7640000	7390000	7610000	6570000	6670000	7130000	7690000	7550000	8650000	7410000	7310000	7360000	7070000	6360000	6760000	5700000	5880000	7080000	6940000	6760000	6940000	6660000	6910000	7490000	7360000
P04211	P04211;A0A075B6I9	LV743_HUMAN	IGLV7-43	Immunoglobulin lambda variable 7-43	2540000	3080000	2950000	2510000	2980000	2520000	2600000	2310000	2550000	2670000	2670000	2360000	5090000	4680000	5480000	5240000	5860000	6270000	5770000	5220000	5330000	5600000	5700000	4840000	3960000	3830000	4040000	4200000	4780000	4230000	4060000	4410000	4250000	3960000	3950000	3760000	1220000	1880000	1590000	1620000	1780000	1810000	1850000	1910000	1890000
P04217	P04217	A1BG_HUMAN	A1BG	Alpha-1B-glycoprotein	250000000	264000000	336000000	252000000	343000000	265000000	281000000	290000000	274000000	245000000	256000000	241000000	196000000	216000000	201000000	211000000	207000000	228000000	193000000	199000000	212000000	200000000	195000000	187000000	187000000	191000000	196000000	192000000	212000000	199000000	195000000	199000000	190000000	170000000	174000000	178000000	207000000	221000000	239000000	227000000	230000000	232000000	214000000	223000000	224000000
P04259	P04259;P48668	K2C6B_HUMAN	KRT6B	Keratin, type II cytoskeletal 6B	115050													222962	141492	152899	235070		176212	191656	156094	233162	183581		172848	160739	131220		137239	268410	176565	185080	185534	234754	177319	256323	116381	187790	119056	212226	148810	300016		199846	183620
P04264	P04259;P04264	K2C1_HUMAN	KRT1	Keratin, type II cytoskeletal 1	26900000	25800000	30400000	26300000	31800000	26800000	26300000	20100000	25000000	22300000	23600000	27900000	17900000	21900000	18300000	22500000	21100000	19000000	18600000	19300000	29600000	24700000	18800000	17100000	16500000	18300000	19400000	16900000	20300000	18900000	16800000	20100000	18200000	19500000	17200000	18800000	18400000	18200000	18800000	18400000	20400000	19400000	19900000	20400000	21400000
P04275	P04275	VWF_HUMAN	VWF	von Willebrand factor	26300000	31700000	31300000	28900000	32500000	26700000	24000000	25400000	25900000	28400000	25600000	24500000	24200000	22800000	25000000	22700000	24000000	25100000	22400000	23600000	25200000	25200000	23700000	22300000	23500000	21800000	23500000	23200000	24700000	24200000	21900000	24400000	22800000	22400000	22300000	21500000	22900000	23200000	24700000	25000000	23200000	24000000	24500000	24100000	26600000
P04278	P04278	SHBG_HUMAN	SHBG	Sex hormone-binding globulin	5840000	6640000	6960000	9290000	7070000	7880000	9020000	5730000	6070000	6120000	5820000	5240000	7720000	8150000	6470000	7510000	6920000	8780000	6670000	8900000	7100000	10100000	10400000	7750000	6170000	6580000	6670000	7140000	6970000	6820000	6960000	8130000	6330000	5630000	5550000	5730000	5730000	7430000	8250000	7590000	7970000	7660000	7650000	7480000	7300000
P04406	P04406	G3P_HUMAN	GAPDH	Glyceraldehyde-3-phosphate dehydrogenase	75200000	93100000	84800000	138000000	52000000	96900000	87200000	89400000	73600000	189000000	106000000	94200000	46100000	54700000	48700000	75700000	57200000	73700000	70800000	46400000	59600000	71000000	70700000	70100000	57000000	54900000	58000000	57900000	72000000	47200000	55800000	61700000	59700000	63600000	58300000	63600000	53200000	53900000	59700000	58200000	54800000	60700000	46400000	52200000	66700000
P04430	P04430	KV116_HUMAN	IGKV1-16	Immunoglobulin kappa variable 1-16	829308	914073	1230000	1220000	1130000	897595	829707	942069	841855	756907	779651	674457	1020000	976686	938927	1160000	887312	1070000	947309	1050000	1090000	1080000	1050000	863281	808500	878580	1050000	876174	897199	748919	856360	910116	827174	717337	770189	817971	1160000	1420000	1150000	1070000	1040000	1000000	1410000	1430000	1220000
P04433	P04433;A0A0A0MRZ8	KV311_HUMAN	IGKV3-11	Immunoglobulin kappa variable 3-11	14700000	17900000	24200000	18800000	21400000	20200000	20800000	24000000	21700000	19200000	19100000	17400000	25900000	25900000	25700000	26600000	24200000	25800000	26000000	25800000	25700000	26800000	26800000	21900000	30800000	30300000	31800000	30300000	31100000	30200000	29300000	29600000	26200000	25900000	30700000	25200000	23100000	20700000	20700000	19700000	21300000	19400000	22800000	21400000	19400000
P04746;P0DTE7;P0DTE8;P0DUB6;P19961	P04746;P0DTE7;P0DTE8;P0DUB6;P19961	AMY1A_HUMAN;AMY1B_HUMAN;AMY1C_HUMAN;AMY2B_HUMAN;AMYP_HUMAN	AMY1A;AMY1B;AMY1C;AMY2A;AMY2B	Pancreatic alpha-amylase	127595	27375.9	170531	25943		157805	14492.2	99635.8	34849.3	18931.1		17612.9	11310.7	10697.9	8644.31	4942.15	68059.4	10849.4	11005.1	60750.6	65924.3		10388.1	8108.6	19823.8	67016.3	7329.96	11548.1	15083.5	94058.6	14560.5	11776	9469.83		108326	81712.1	13269.2	79823.5	12968	13215.3	12231.8	8398.92	81080.6	90412.4	27552.3
P05062	P05062	ALDOB_HUMAN	ALDOB	Fructose-bisphosphate aldolase B	3760000	4030000	4170000	2580000	8940000	6180000	2820000	4950000	5420000	6450000	3780000	7920000	4160000	4600000	4130000	4180000	4810000	4470000	4780000	4430000	4360000	6410000	4760000	4310000	5270000	4600000	4740000	5510000	3680000	4070000	4190000	4700000	4450000	4420000	4320000	4610000	4300000	4510000	3550000	4030000	3480000	4230000	5900000	4570000	5190000
P05067	P05067	A4_HUMAN	APP	Amyloid-beta precursor protein	10300000	10500000	4570000	9810000	6020000	10700000	9870000	7980000	9280000	5340000	19100000	16700000	12500000	11200000	8030000	9020000	11000000	9120000	10200000	12800000	8810000	9650000	10600000	11000000	9880000	10400000	10000000	5620000	10400000	10400000	8430000	9950000	10700000	11400000	10400000	12100000	9900000	8890000	8720000	11200000	9360000	10300000	8800000	10300000	8940000
P05089	P05089	ARGI1_HUMAN	ARG1	Arginase-1	23200000	16500000	24000000	21000000	22800000	19700000	16600000	17100000	17100000	10600000	9660000	9670000	17700000	17700000	17900000	17500000	18500000	18200000	18600000	18500000	15400000	16500000	16400000	16500000	21700000	18100000	18500000	19500000	17500000	20300000	17600000	18400000	16500000	16800000	18700000	17300000	16100000	17800000	16800000	18500000	18400000	19200000	17700000	18700000	21300000
P05090	P05090	APOD_HUMAN	APOD	Apolipoprotein D	7200000	8670000	10200000	8420000	9610000	7750000	7370000	6630000	7890000	7690000	7970000	6810000	9650000	8810000	9280000	8850000	9160000	9350000	9870000	8900000	8810000	8580000	9450000	8870000	8630000	6790000	7780000	7830000	8280000	6820000	7020000	7550000	6910000	7500000	7580000	6660000	7140000	7880000	7840000	7780000	7700000	7690000	8250000	8980000	10000000
P05109	P05109	S10A8_HUMAN	S100A8	Protein S100-A8	31800000	39900000	48000000	36100000	30800000	35900000	27400000	33000000	45000000	44600000	52700000	31700000	34200000	33700000	29600000	26700000	28900000	33800000	31800000	32100000	31900000	31100000	31800000	32800000	36500000	28100000	32800000	30900000	32000000	29900000	28500000	31800000	34300000	32700000	34100000	29700000	32800000	31700000	38200000	45300000	43400000	36000000	33700000	31600000	75700000
P05154	P05154	IPSP_HUMAN	SERPINA5	Plasma serine protease inhibitor	21000000	23500000	30600000	21900000	27700000	24400000	24900000	29700000	25100000	18800000	13300000	12900000	20700000	19500000	20900000	18900000	18300000	20600000	20600000	21400000	20400000	20300000	22300000	17800000	20700000	23000000	22800000	21300000	21600000	21100000	21700000	24200000	20800000	18500000	20600000	15900000	20300000	25200000	22400000	22400000	22200000	20500000	22100000	24200000	23200000
P05155	P05155	IC1_HUMAN	SERPING1	Plasma protease C1 inhibitor	107000000	113000000	150000000	119000000	146000000	121000000	117000000	121000000	120000000	114000000	120000000	114000000	89300000	86200000	86100000	83600000	83600000	90300000	95200000	91400000	90500000	88900000	89800000	82900000	106000000	104000000	101000000	99900000	102000000	97700000	101000000	110000000	97200000	100000000	101000000	89900000	135000000	136000000	125000000	135000000	135000000	134000000	149000000	136000000	140000000
P05156	P05156	CFAI_HUMAN	CFI	Complement factor I	108000000	117000000	141000000	117000000	143000000	117000000	115000000	107000000	116000000	115000000	111000000	93800000	69000000	70000000	64800000	69200000	68100000	70800000	69100000	65800000	65600000	68600000	64600000	61700000	90500000	77200000	88100000	84900000	96700000	83400000	87400000	90700000	83000000	80400000	83300000	74100000	85500000	81700000	88600000	90900000	87700000	90400000	82100000	90100000	101000000
P05160	P05160	F13B_HUMAN	F13B	Coagulation factor XIII B chain	12100000	13300000	15300000	13800000	17000000	13000000	12100000	12600000	13200000	13300000	13900000	12900000	10300000	10400000	11800000	11700000	11200000	11000000	10400000	10500000	10300000	10600000	10700000	9620000	11400000	10600000	11500000	12000000	12100000	11200000	11800000	12600000	12000000	10600000	11600000	10800000	9930000	10100000	9880000	9650000	10500000	10300000	9330000	9650000	10700000
P05186	P05186	PPBT_HUMAN	ALPL	Alkaline phosphatase, tissue-nonspecific isozyme	409360	475222	624455	514362	658973	435375		515053	351962	200667	248494	220768	732199	759148	759560	842640	721698	760273	846427	846776	790425	828908	866417	708503	545873	565101	575623	564468	529501	497888	491111	468003	441040	364973	487663	404683	566618	607325	541540	627084	606277	520799	615048	650466	465535
P05362	P05362	ICAM1_HUMAN	ICAM1	Intercellular adhesion molecule 1	208000000	255000000	320000000	198000000	282000000	207000000	236000000	220000000	202000000	162000000	169000000	187000000	203000000	175000000	198000000	201000000	211000000	213000000	190000000	178000000	216000000	222000000	201000000	213000000	198000000	196000000	226000000	212000000	208000000	176000000	197000000	202000000	204000000	179000000	216000000	186000000	223000000	212000000	232000000	204000000	215000000	200000000	221000000	220000000	182000000
P05452	P05452	TETN_HUMAN	CLEC3B	Tetranectin	1570000	1730000	2500000	1820000	2460000	1920000	1790000	2010000	1850000	1830000	1980000	1550000	1630000	1730000	1840000	1840000	1730000	1760000	1700000	1650000	1820000	1840000	1900000	1570000	1650000	1480000	1820000	1800000	1860000	1580000	1910000	1670000	1520000	1410000	1510000	1360000	1130000	1150000	1200000	1060000	1020000	968708	1080000	1110000	1050000
P05543	P05543	THBG_HUMAN	SERPINA7	Thyroxine-binding globulin	22000000	22500000	28500000	23300000	33300000	26500000	24100000	25700000	24500000	23900000	23000000	21200000	19800000	18900000	18800000	17700000	18400000	18700000	18500000	19400000	19800000	18700000	18500000	17400000	24000000	23400000	24300000	23300000	25000000	24600000	23500000	24100000	21400000	21800000	22500000	18800000	19600000	19100000	20600000	22000000	21400000	20700000	19700000	20600000	23200000
P05546	P05546	HEP2_HUMAN	SERPIND1	Heparin cofactor 2	8000000	8610000	9710000	8230000	10500000	7960000	8060000	8440000	8630000	7830000	7980000	7270000	5770000	5700000	5610000	5710000	5940000	6160000	5880000	5700000	5530000	5640000	5940000	5420000	6020000	5460000	5800000	5830000	6060000	5500000	5660000	5970000	5410000	5160000	5360000	4930000	6870000	7310000	6990000	7550000	7480000	7370000	7680000	7810000	7900000
P05556	P05556	ITB1_HUMAN	ITGB1	Integrin beta-1	23600000	27100000	6580000	17500000	7060000	18500000	11000000	9400000	11300000	2870000	4200000	4150000	4900000	7500000	5830000	6350000	20500000	6790000	5880000	5210000	6060000	6440000	5890000	5600000	6230000	6140000	6100000	7060000	7460000	6810000	6490000	6970000	6820000	5840000	6010000	6410000	5880000	4930000	6440000	7760000	7370000	7620000	6480000	7820000	23800000
P06276	P06276	CHLE_HUMAN	BCHE	Cholinesterase	2200000	3220000	3140000	2940000	3400000	3120000	2750000	2860000	3320000	3110000	3090000	2710000	1420000	1530000	1270000	1370000	1440000	1520000	1530000	1260000	1440000	1620000	1300000	1290000	2050000	1860000	1920000	1930000	2120000	1870000	1790000	2110000	1910000	2010000	1850000	1520000	2320000	2230000	2730000	2390000	2500000	2460000	2140000	2450000	3130000
P06310	P06310	KV230_HUMAN	IGKV2-30	Immunoglobulin kappa variable 2-30	1430000	1760000	2240000	1250000	2110000	1520000	1600000	1690000	1810000	2240000	2200000	2010000	1510000	1910000	1910000	2590000	2170000	2320000	1300000	1360000	2170000	2660000	2010000	2180000	812906	1170000	1580000	1320000	1840000	694762	1350000	1370000	1720000	1370000	996514	1390000	2610000	1840000	3270000	2540000	2700000	2490000	2330000	2430000	2100000
P06312	P06312	KV401_HUMAN	IGKV4-1	Immunoglobulin kappa variable 4-1	18500000	21600000	30500000	25600000	32600000	26000000	23700000	26200000	24700000	24200000	25400000	22500000	39100000	35700000	35300000	38000000	35000000	38300000	39300000	38700000	38900000	38700000	39600000	35200000	37900000	42500000	40500000	40300000	41300000	38900000	38100000	40100000	37300000	35200000	38000000	31800000	40000000	33500000	32800000	34200000	37400000	32400000	35800000	36400000	33700000
P06331	P01824;P01825;P06331;A0A0C4DH41;P0DP06;P0DP08	HV434_HUMAN	IGHV4-34	Immunoglobulin heavy variable 4-34	1920000	2290000	2590000	2360000	2780000	1940000	2010000	2080000	2080000	1820000	1900000	1530000	2490000	2390000	2430000	2360000	2470000	2530000	2590000	2470000	2560000	2510000	2550000	2330000	2840000	2750000	2790000	2740000	2890000	2680000	2690000	2750000	2560000	2590000	2640000	2020000	1600000	1590000	1650000	1660000	1630000	1480000	1740000	1860000	2010000
P06396	P06396	GELS_HUMAN	GSN	Gelsolin	6270000	6900000	9800000	7920000	9420000	7300000	6590000	6950000	7220000	6830000	7220000	6110000	6680000	7470000	7190000	7620000	7490000	8300000	7710000	7390000	7930000	7800000	7610000	6910000	8170000	7590000	8400000	8220000	8360000	8200000	8650000	8090000	7990000	7350000	7540000	6960000	7770000	8090000	8170000	7910000	8090000	7950000	8470000	8150000	8260000
P06576	P06576	ATPB_HUMAN	ATP5F1B	ATP synthase subunit beta, mitochondrial	2850000	2750000	4000000		4400000		2770000	2600000	2200000	2210000	2280000	1860000		1690000	1560000	1810000	1600000					1830000	2300000	1560000		1820000	1640000	1530000	1670000	1550000		1680000	1840000	1960000	1740000	1760000	3010000	1720000					1700000	1560000	2740000
P06681	P06681	CO2_HUMAN	C2	Complement C2	74200000	88800000	107000000	90600000	100000000	86300000	83200000	74700000	84100000	89800000	83600000	73000000	117000000	113000000	109000000	110000000	107000000	116000000	110000000	105000000	98800000	105000000	106000000	100000000	111000000	107000000	115000000	109000000	116000000	111000000	110000000	113000000	107000000	107000000	106000000	100000000	115000000	106000000	114000000	114000000	114000000	119000000	108000000	112000000	118000000
P06702	P06702	S10A9_HUMAN	S100A9	Protein S100-A9	17300000	20100000	27300000	22100000	35900000	17600000	26000000	20200000	31200000	27800000	24200000	22300000	18400000	24900000	21600000	24400000	22600000	19800000	18500000	19400000	21100000	18600000	20000000	18500000	16100000	20600000	19800000	20900000	23900000	18800000	20700000	19300000	24600000	21700000	18200000	19800000	22000000	22700000	27400000	25800000	27200000	22300000	24800000	21300000	25200000
P06727	P06727	APOA4_HUMAN	APOA4	Apolipoprotein A-IV	53000000	53900000	62000000	48300000	61100000	49700000	56000000	44100000	42800000	39900000	42200000	40800000	39000000	39500000	30200000	28200000	30300000	41700000	43200000	37800000	34300000	34600000	33900000	33200000	50200000	40300000	46500000	45200000	49000000	43400000	55900000	45800000	39600000	37000000	40100000	28900000	52000000	50400000	42800000	40200000	40900000	36500000	52100000	55600000	51300000
P06733	P06733	ENOA_HUMAN	ENO1	Alpha-enolase	12900000	3100000	5110000	12700000	5390000	16900000	3500000	9610000	5020000	4820000	4900000	4370000	4050000	3350000	4500000	3600000	3690000	4000000	3670000	3730000	3870000	4210000	3850000	4190000	4700000	4130000	5230000	5360000	4540000	5340000	4270000	4540000	4500000	4060000	4670000	3470000	4850000	4180000	4540000	4820000	5200000	5150000	4190000	4250000	4760000
P06744	P06744	G6PI_HUMAN	GPI	Glucose-6-phosphate isomerase	27500000	13400000	62700000	48200000	63100000	41400000	42200000	41900000	11500000	33500000	33700000	34300000	22000000	45500000	47500000	39600000	49400000	45800000	37600000	47700000	39700000	47300000	44700000	38500000	43600000	34500000	46700000	48600000	35600000	44200000	41800000	17800000	46900000	41400000	46900000	40500000	44800000	48200000	48800000	46100000	45500000	50000000	45800000	47300000	46600000
P06753	P06753	TPM3_HUMAN	TPM3	Tropomyosin alpha-3 chain		1700000	1310000	2400000	1790000	1330000	1040000	1610000	4630000				1080000	1270000	1070000	1310000	1770000	966478	1060000	995170	883755	925006	980377	955668	1080000	812512	1210000			972303	1300000	1310000			1050000				1270000	1480000	1390000				1030000
P07148	P07148	FABPL_HUMAN	FABP1	Fatty acid-binding protein, liver	4340000	7480000	5070000	3340000	8150000	5220000	6040000	3400000	4690000	5560000	5480000	4790000	4360000	3790000	3750000	3580000	3410000	4240000	3750000	3570000	3000000	3410000	3730000	3930000	4420000	3050000	3290000	4110000	4470000	3830000	2790000	2870000	3790000	4540000	3980000	3800000	3010000	3490000	3490000	3970000	3650000	4450000	3810000	3610000	6570000
P07195	P00338;P07195;P07864;Q6ZMR3	LDHB_HUMAN	LDHB	L-lactate dehydrogenase B chain	21400000	26700000	29700000	20600000	28200000	28600000	26500000	23500000	22000000	19900000	20100000	17700000	19800000	19000000	17700000	16000000	19100000	19900000	20000000	20100000	16000000	19100000	15900000	14800000	14900000	13700000	15200000	15300000	15600000	14500000	14400000	15700000	15500000	12800000	14900000	13500000	17400000	16300000	14400000	15500000	16800000	18700000	14500000	15200000	23800000
P07225	P07225	PROS_HUMAN	PROS1	Vitamin K-dependent protein S	9710000	9730000	12000000	9520000	12900000	9970000	9530000	9770000	10200000	9690000	9600000	9660000	8850000	8550000	8520000	8500000	8660000	9140000	9150000	8760000	8870000	8730000	8420000	7560000	8950000	8570000	9000000	9040000	9780000	8280000	8850000	9670000	8580000	8430000	8030000	7830000	9490000	9190000	9510000	10100000	10300000	10200000	9540000	10400000	11100000
P07237	P07237	PDIA1_HUMAN	P4HB	Protein disulfide-isomerase	32800000	38600000	47800000	36600000	48100000	36100000	32500000	27700000	34700000	34000000	37400000	30800000	33400000	28300000	26100000	27400000	29300000	31600000	29600000	28100000	28200000	30600000	27800000	29300000	25600000	22400000	27700000	27100000	27500000	26300000	26000000	25100000	25600000	25100000	23700000	20500000	28100000	26400000	30700000	29900000	29700000	32400000	30100000	31100000	32400000
P07305	P07305	H10_HUMAN	H1-0	Histone H1.0	19200000	22600000	27400000	20900000	26600000	20400000	18600000	17500000	19200000	20900000	21500000	17900000	18900000	19000000	19400000	19200000	18500000	22000000	19600000	18900000	20600000	21600000	20400000	18400000	19000000	17200000	18600000	18700000	21700000	18900000	18200000	18100000	18300000	16700000	17900000	16300000	18100000	18500000	20000000	20400000	21600000	20300000	20300000	17600000	16900000
P07307	P07307	ASGR2_HUMAN	ASGR2	Asialoglycoprotein receptor 2	11700000	9870000	11300000	14700000	11300000	14700000	6900000	4900000	6300000	5250000	3420000	3480000	3800000	3780000	4940000	4920000	3640000	4710000	3530000	4240000	4170000	4380000	4010000	5410000	4090000	3460000	5680000	3870000	3020000	4420000	3630000	3900000	5430000	3290000	5170000	4310000	3910000	4020000	4030000	4220000	4250000	4370000	3790000	3970000	4250000
P07333	P07333	CSF1R_HUMAN	CSF1R	Macrophage colony-stimulating factor 1 receptor														4840000	5080000						3440000	4190000	3650000					4730000	5580000		3870000	4450000			4440000			3010000		4200000	3780000	4360000	3160000	3860000	6800000
P07339	P07339	CATD_HUMAN	CTSD	Cathepsin D	112000000	154000000	159000000	146000000	80400000	115000000	133000000	113000000	133000000	147000000	123000000	133000000	116000000	109000000	115000000	113000000	118000000	107000000	107000000	109000000	112000000	117000000	108000000	111000000	104000000	113000000	121000000	115000000	116000000	107000000	108000000	121000000	117000000	118000000	123000000	137000000	120000000	124000000	118000000	121000000	125000000	126000000	119000000	124000000	114000000
P07357	P07357	CO8A_HUMAN	C8A	Complement component C8 alpha chain	115000000	140000000	161000000	120000000	174000000	120000000	115000000	111000000	126000000	115000000	117000000	111000000	96900000	101000000	99900000	102000000	95700000	111000000	103000000	97700000	98900000	97200000	94200000	93100000	85900000	86300000	84000000	83500000	101000000	82300000	83500000	94100000	89800000	81600000	89800000	74200000	98600000	101000000	104000000	107000000	111000000	109000000	104000000	107000000	134000000
P07358	P07358	CO8B_HUMAN	C8B	Complement component C8 beta chain	2660000	3030000	3740000	2920000	3830000	2920000	2900000	2880000	2780000	2850000	2880000	2900000	2460000	2470000	2370000	2510000	2440000	2590000	2600000	2510000	2480000	2620000	2510000	2320000	2250000	2130000	2330000	2240000	2410000	2260000	2130000	2410000	2270000	2070000	2110000	1830000	2470000	2530000	2640000	2820000	2700000	2860000	2630000	2780000	3180000
P07359	P07359	GP1BA_HUMAN	GP1BA	Platelet glycoprotein Ib alpha chain	1390000	1470000	1890000	1880000	2540000	1770000	1690000	1650000	1460000	1270000	1490000	1340000	1400000	1340000	1560000	1740000	1580000	1640000	1580000	1530000	1550000	1820000	1570000	1460000	1410000	1290000	1510000	1680000	1950000	1330000	1500000	1300000	1340000	1160000	1300000	1200000	1460000	1560000	1720000	1460000	1750000	1680000	1630000	1560000	1400000
P07360	P07360	CO8G_HUMAN	C8G	Complement component C8 gamma chain	5010000	4980000	7370000	6060000	7080000	6090000	5610000	5730000	4590000	3330000	3440000	3270000	4880000	4520000	4560000	4150000	4460000	4720000	5070000	5200000	4670000	4330000	4800000	4410000	3500000	3800000	3490000	3670000	3270000	3620000	3270000	3880000	3310000	3170000	3810000	3040000	4380000	4690000	3310000	4660000	4720000	4590000	4980000	4980000	4290000
P07737	P07737	PROF1_HUMAN	PFN1	Profilin-1	446432	252550	535398	243201	274857	965428	546264	1220000	425028	244491	310534	144935	247009	423784	135586	132647	121370	380640	483934	589938	101960	209164	110251	218066	296486	189636	357800	274388	194865	219343		576328	216916	451039	233903	340161	593870	430544	215707	311135	539134	1570000	260911	445368	1110000
P07738	P07738	PMGE_HUMAN	BPGM	Bisphosphoglycerate mutase	9090000	1760000	2990000	2180000	2910000	8020000	7830000	8350000	6820000	6250000	4500000	3770000	6330000	6360000	6070000	6690000	5560000	7120000	6560000	6690000	6650000	6790000	6780000	6110000	4110000	4000000	4130000	3960000	4380000	3960000	3600000	3180000	4570000	4230000	4280000	3860000	3950000	4120000	4240000	4020000	3900000	4050000	5120000	4330000	4300000
P07858	P07858	CATB_HUMAN	CTSB	Cathepsin B	1780000	2120000	2870000	1970000	3140000	1910000	1920000	1480000	2010000	2030000	1580000	1530000	1160000	1210000	974751	1040000	1180000	1190000	1090000	975139	1030000	1050000	1020000	953151	1630000	1170000	1170000	1250000	1430000	1180000	1370000	1400000	1170000	1510000	1350000	1120000	914410	1040000	759196	1110000	1060000	967579	947497	1190000	1750000
P07900	P07900	HS90A_HUMAN	HSP90AA1	Heat shock protein HSP 90-alpha	9000000	9470000	12100000	9720000	13200000	10000000	8850000	8500000	8270000	9980000	8400000	7130000	3760000	10700000	5110000	3310000	4830000	3990000	4790000	3510000	6890000	6080000	5460000	8710000	4110000	6140000	6090000	5170000	3520000	3850000	3280000	3890000	6490000	4290000	3890000	6740000	5560000	5560000	6550000	6230000	3700000	4110000	3620000	3970000	6840000
P07911	P07911	UROM_HUMAN	UMOD	Uromodulin	278000000	241000000	283000000	134000000	305000000	112000000	201000000	221000000	202000000	214000000	234000000	232000000	233000000	208000000	230000000	219000000	249000000	215000000	211000000	225000000	233000000	227000000	214000000	238000000	212000000	203000000	219000000	221000000	212000000	205000000	209000000	243000000	236000000	218000000	230000000	237000000	245000000	215000000	238000000	226000000	224000000	228000000	215000000	222000000	180000000
P07942	P07942	LAMB1_HUMAN	LAMB1	Laminin subunit beta-1	13400000	9950000	3200000	8610000	9660000	9400000	8240000	8570000	6910000	11900000	13200000	12300000	9880000	9400000	8990000	9540000	8960000	11500000	9250000	8990000	9980000	9210000	8920000	9430000	8090000	9030000	9290000	9710000	12500000	10000000	8490000	9300000	8830000	9530000	8480000	9030000	6890000	8350000	9300000	9570000	8600000	9740000	8480000	9530000	8800000
P07996	P07996	TSP1_HUMAN	THBS1	Thrombospondin-1	19500000	23800000	28500000	25300000	26000000	24000000	20900000	19500000	22500000	17600000	20000000	19300000	15800000	16300000	16700000	15700000	17000000	15400000	16000000	16400000	15300000	16400000	15100000	14400000	16900000	15000000	16000000	16400000	18300000	15400000	16600000	17400000	16100000	17900000	16000000	16500000	16700000	16800000	17900000	17400000	18500000	20100000	16700000	18000000	21500000
P07998	P07998	RNAS1_HUMAN	RNASE1	Ribonuclease pancreatic	2230000	1310000	233623	1990000	240395	2310000	2060000	2300000	2080000	1300000	1410000	1470000	2560000	2150000	2610000	2060000	2030000	2010000	2330000	2290000	2440000	2410000	2500000	2960000	2270000	2110000	2180000	2070000	1840000	2530000	1760000	2120000	2360000	2860000	2800000	2450000	2400000	1770000	1810000	2090000	2110000	1890000	2270000	1940000	1880000
P08185	P08185	CBG_HUMAN	SERPINA6	Corticosteroid-binding globulin	104000000	111000000	173000000	146000000	198000000	140000000	141000000	152000000	139000000	150000000	128000000	122000000	102000000	108000000	102000000	108000000	99100000	112000000	106000000	111000000	117000000	108000000	109000000	109000000	87100000	94300000	96200000	94700000	102000000	98600000	99300000	106000000	98500000	89100000	92500000	85800000	101000000	104000000	110000000	109000000	110000000	108000000	120000000	110000000	106000000
P08195	P08195	4F2_HUMAN	SLC3A2	4F2 cell-surface antigen heavy chain	53300000	47500000	75800000	27900000	83200000	46800000	155000000	207000000	271000000	514000000	603000000	415000000	274000000	292000000	342000000	327000000	330000000	314000000	310000000	341000000	363000000	343000000	379000000	305000000	340000000	437000000	439000000	361000000	375000000	323000000	387000000	352000000	415000000	393000000	457000000	412000000	476000000	441000000	469000000	399000000	423000000	444000000	392000000	389000000	394000000
P08253	P08253	MMP2_HUMAN	MMP2	72 kDa type IV collagenase	2190000	1880000	2680000	2410000	2390000	2050000	2470000	3410000	2430000	1880000	2070000	2170000	2400000	2720000	2810000	2810000	3060000	3240000	3140000	3120000	3390000	2790000	3300000	2310000	2350000	2910000	2670000	2530000	2560000	2470000	2540000	2940000	2740000	1960000	2780000	2280000	2050000	2790000	2440000	2680000	2680000	2460000	2670000	2850000	2290000
P08294	P08294	SODE_HUMAN	SOD3	Extracellular superoxide dismutase [Cu-Zn]	2140000	2580000	3520000	2630000	5970000	2330000	2550000	2350000	2910000	1900000	2500000	2060000	2550000	2110000	2860000	1980000	2120000	2440000	2660000	2690000	2110000	2300000	2160000	1880000	2420000	1830000	2010000	2420000	2500000	2210000	2130000	2500000	2080000	2700000	2010000	2390000	2130000	1840000	1640000	2160000	2220000	2240000	1910000	2440000	3380000
P08493	P08493	MGP_HUMAN	MGP	Matrix Gla protein	1170000	7450000	7760000	3430000	4870000	4450000	3630000		1640000	3300000	1790000	674997	1840000	5110000	1420000	1500000	5390000	4460000	4190000	1370000	4000000	1280000	1150000	1280000	1250000	904290	3490000	704012	4020000	975804	1010000	1090000	3820000	3690000	1150000	3520000	4100000	1150000	1330000	1400000	714361	1390000		1330000	463092
P08514	P08514	ITA2B_HUMAN	ITGA2B	Integrin alpha-IIb	2080000	2370000	2170000	6210000	2530000	1870000	1300000	1650000	1900000	4940000	8760000	1150000	1630000	1870000	1450000	1530000	1850000	1790000	1560000	1410000	1170000	1310000	1170000	1360000	1530000	1440000	1200000	1350000	1450000	1460000	1250000	1100000	1300000	1400000	1280000	1500000	1780000	1120000	1260000	1450000	1570000	1980000	1260000	1510000	1880000
P08519	P08519	APOA_HUMAN	LPA	Apolipoprotein(a)	6450000	8570000	9250000	6300000	8040000	6000000	6860000	5800000	5810000	6160000	5050000	4460000	5730000	5540000	5680000	5460000	5250000	6090000	5590000	5450000	5280000	5980000	5360000	4840000	8170000	7320000	7500000	6990000	8860000	6970000	7550000	8240000	8650000	8460000	6980000	9870000	6000000	6320000	6950000	6110000	5830000	6490000	5880000	5970000	6080000
P08571	P08571	CD14_HUMAN	CD14	Monocyte differentiation antigen CD14	18900000	24100000	26200000	21500000	25000000	17000000	19800000	19300000	19600000	19200000	17500000	16600000	16600000	14200000	14600000	12900000	14300000	14700000	15300000	14500000	12200000	14700000	14200000	14100000	13700000	12500000	13300000	13500000	14400000	13600000	13000000	14800000	12700000	13300000	13500000	13500000	16000000	15000000	17100000	18600000	19700000	21200000	17900000	17500000	20500000
P08581	P08581	MET_HUMAN	MET	Hepatocyte growth factor receptor	2960000	6220000	5580000	3870000	6180000	4300000	5490000	5190000	9150000	10400000	14000000	8820000	7250000	7690000	10100000	9040000	7880000	7800000	3900000	6220000	5860000	8010000	6940000	6610000	7640000	6760000	6700000	6340000	9750000	8330000	6640000	6560000	5660000	6350000	5550000	6940000	9150000	6480000	12200000	6800000	8380000	7990000	8950000	6200000	8800000
P08603	P08603	CFAH_HUMAN	CFH	Complement factor H	75000000	84700000	102000000	78900000	102000000	81600000	77500000	79100000	75400000	73300000	76100000	69200000	56800000	54300000	56300000	55700000	54900000	58200000	54100000	54100000	54900000	56300000	56000000	51600000	60900000	60300000	64600000	65000000	69400000	60600000	61100000	65900000	63700000	59100000	61000000	59500000	72000000	70600000	80800000	73900000	76500000	75400000	69900000	71600000	70100000
P08637	P08637	FCG3A_HUMAN	FCGR3A	Low affinity immunoglobulin gamma Fc region receptor III-A	138000000	143000000	152000000	136000000	138000000	111000000	128000000	101000000	124000000	163000000	117000000	116000000	97100000	124000000	109000000	148000000	121000000	106000000	90400000	98200000	83300000	100000000	90000000	111000000	79900000	81300000	113000000	105000000	106000000	87200000	81200000	99100000	102000000	119000000	107000000	133000000	127000000	111000000	127000000	108000000	140000000	126000000	93100000	117000000	135000000
P08697	P08697	A2AP_HUMAN	SERPINF2	Alpha-2-antiplasmin	6630000	7080000	8490000	7000000	9900000	7300000	6790000	7580000	7140000	6210000	5780000	6380000	5600000	6090000	5570000	5800000	5910000	6860000	6650000	6430000	6630000	5920000	6250000	5680000	6650000	7030000	6370000	6500000	6780000	6750000	6220000	7130000	6020000	5770000	6040000	5290000	5900000	6980000	6460000	6850000	7300000	6960000	7260000	7620000	6930000
P08709	P08709	FA7_HUMAN	F7	Coagulation factor VII	4990000	4750000	5780000	5780000	6730000	5750000	4660000	6540000	5730000	5170000	5650000	4550000	4410000	5350000	5410000	5720000	5040000	6340000	5750000	5940000	5310000	5610000	6100000	4610000	4750000	7010000	6120000	6090000	6240000	5900000	6820000	6330000	5450000	5530000	6120000	4630000	6230000	6720000	7660000	5210000	5340000	4700000	6990000	4390000	7450000
P08758	P08758	ANXA5_HUMAN	ANXA5	Annexin A5	1700000	1620000	2300000	8790000	2310000	8040000	1740000	1500000	319000000	6730000	312000000	1310000	1430000	1750000	1180000	1310000	1580000	1950000	1710000	1700000	1440000	277000000	259000000	1550000	1880000	1800000	1810000	1400000	1330000	1890000	1790000	1760000	1580000	2130000	1960000	1760000	1180000	1710000	317000000	1710000	312000000	319000000	263000000	1880000	1810000
P08833	P08833	IBP1_HUMAN	IGFBP1	Insulin-like growth factor-binding protein 1	167000000	168000000	171000000	56100000	159000000	129000000	135000000	120000000	131000000	136000000	147000000	125000000	125000000	131000000	115000000	144000000	131000000	98000000	93400000	107000000	105000000	130000000	103000000	115000000	108000000	104000000	113000000	114000000	117000000	103000000	105000000	107000000	120000000	129000000	116000000	115000000	136000000	120000000	145000000	155000000	130000000	136000000	125000000	126000000	146000000
P09172	P09172	DOPO_HUMAN	DBH	Dopamine beta-hydroxylase	8610000	9080000	13200000	8010000	14600000	7020000	9250000	7060000	8890000	11600000	9310000	9320000	8140000	9290000	5770000	8560000	9890000	9310000	7930000	8000000	7320000	9140000	8170000	6810000	6640000	6950000	9060000	8440000	6820000	8240000	8460000	7550000	6090000	8270000	8420000	7600000	9860000	9140000	8620000	9270000	6770000	8520000	9430000	8430000	8650000
P09211	P09211	GSTP1_HUMAN	GSTP1	Glutathione S-transferase P	10500000	8780000	12400000	11600000	12900000	11100000	9450000	12000000	7950000	3350000	7130000	2810000	7820000	6900000	8630000	6560000	7130000	10700000	8290000	10200000	9250000	7940000	9810000	5770000	10400000	10800000	10800000	6090000	9220000	13000000	9740000	11100000	8760000	7440000	9450000	5680000	4410000	10100000	7920000	9550000	8870000	11000000	9030000	10200000	8900000
P09486	P09486	SPRC_HUMAN	SPARC	SPARC	7360000	8200000	14600000	5930000	18800000	17000000	5770000	6830000	17000000	8940000	7950000	8390000	9540000	4700000	4380000	10900000	7000000	6430000	6690000	6140000	6280000	3970000	10000000	6070000	12100000	6290000	9380000	6350000	6880000	6720000	9630000	7440000	6750000	4960000	4090000	5130000	7510000	8590000	8390000	11600000	7520000	8240000	7670000	8520000	7380000
P09493	P07951;P09493	TPM1_HUMAN	TPM1	Tropomyosin alpha-1 chain	875282	1300000	1070000	825496	1060000	897098	1030000	752294	990786	1130000		1010000	893257	890319	792571	690651	968416	749449	744427	719777	669398	770690	724392	845408	786441	766165	728308	745054	846742	848273	705358	933807	833705	894539	876533	1070000	857011	688361	904101	921979	670369	741169	729182	747541	810056
P09603	P09603	CSF1_HUMAN	CSF1	Macrophage colony-stimulating factor 1	216732		267164	188522	251448	208862	236806	227324	222319	118836	224751	197953	166603	162624	205597	202356	195842	236675	187268	175289	204505	198856	227840	181498	64033.9	129981	190361	180970	169483	85770	196021	179919					193339	262262	298363	263262	265631	252579	224991	221675	226971
P09668	P09668	CATH_HUMAN	CTSH	Pro-cathepsin H	7640000	7900000	2660000	3970000	10700000	8380000	5430000	6490000	7910000	9110000	30600000	9620000	11000000	10000000	12100000	13000000	14100000	15300000	13100000	47300000	10300000	12900000	11800000	11800000	9420000	4010000	7690000	6960000	13300000	8100000	8760000	6980000	9160000	8620000	8530000	8120000	7530000	10700000	12700000	12000000	10700000	11800000	8130000	12300000	11600000
P09871	P09871	C1S_HUMAN	C1S	Complement C1s subcomponent	17600000	20100000	22600000	18100000	23400000	19000000	18700000	18900000	18700000	18200000	19700000	17400000	12500000	13700000	12900000	13500000	12200000	15000000	14000000	13900000	14200000	13800000	13700000	12500000	17600000	16800000	19300000	18400000	19900000	17300000	19600000	18800000	17200000	15100000	16200000	14800000	16400000	15600000	17000000	16900000	16400000	16800000	15500000	17100000	15800000
P09960	P09960	LKHA4_HUMAN	LTA4H	Leukotriene A-4 hydrolase	23400000	29700000	37600000	44400000	36200000	30600000	26600000	26600000	34400000	26600000	28100000	27700000	25300000	25500000	26200000	25600000	24400000	28900000	25800000	25100000	27000000	24100000	26600000	24800000	27500000	22800000	26300000	27200000	28000000	23100000	22800000	24200000	26100000	24500000	24700000	23700000	23300000	26200000	27300000	24700000	27100000	27700000	26000000	25800000	27400000
P09972	P09972	ALDOC_HUMAN	ALDOC	Fructose-bisphosphate aldolase C	3870000	3220000	5310000	4290000	5790000	3770000	3500000	3680000	3340000	4570000	4750000	3340000	2360000	2290000	2760000	2320000	2530000	2950000	2850000	2590000	2480000	2590000	2850000	2970000	2190000	1980000	2170000	2250000	1870000	2140000	2130000	1950000	2160000	1880000	1960000	1790000	2360000	2410000	2340000	2590000	2700000	2320000	3140000	3010000	2820000
P0C0L4	P0C0L4	CO4A_HUMAN	C4A	Complement C4-A	1810000	1920000	3140000	2670000	2020000	2530000	2150000	2460000	2090000	1910000	1910000	1680000	425269	429166	442297	401762	394000	460090	484645	470626	549375	437395	527127	444673	1330000	1300000	1570000	1490000	1440000	1460000	1460000	1570000	992866	807887	1320000	706024	1090000	1170000	1440000	1540000	1360000	1500000	1340000	1550000	1470000
P0C0L5	P0C0L4;P0C0L5	CO4B_HUMAN	C4B	Complement C4-B	46300000	48800000	63600000	52200000	65700000	53000000	52500000	53600000	50300000	46300000	45500000	44000000	23400000	25100000	23000000	22800000	23400000	24300000	24700000	25700000	25600000	24300000	24700000	22900000	35300000	36100000	36000000	36000000	36900000	36300000	34700000	38200000	34500000	32800000	34500000	30500000	34200000	33400000	35900000	36700000	37700000	38200000	33700000	34300000	33000000
P0CG04	P0CG04	IGLC1_HUMAN	IGLC1	Immunoglobulin lambda constant 1	4180000	4590000	5480000	4130000	2810000	4240000	4140000	4360000	3680000	1300000	1800000	1740000	1810000	1850000	1740000	2050000	1780000	1770000	1790000	2080000	2050000	1880000	1340000	1690000	2030000	2150000	2250000	1970000	1790000	2020000	1870000	1960000	1860000	2310000	2130000	1970000	2270000	1890000	2410000	2110000	1860000	1790000	2140000	2150000	1900000
P0CG47;P0CG48;P62979;P62987	P0CG47;P0CG48;P62979;P62987	RL40_HUMAN;RS27A_HUMAN;UBB_HUMAN;UBC_HUMAN	RPS27A;UBA52;UBB;UBC	Polyubiquitin-B	8970000	32000000	42000000	33600000	37500000	23600000	17300000	3660000	21600000	18500000	25800000	23600000	17600000	17200000	18100000	17700000	15600000	17000000	16000000	20000000	20400000	20100000	20500000	18700000	18700000	18000000	19700000	16800000	18400000	20500000	17500000	18400000	18300000	18100000	18300000	18400000	19900000	18700000	18700000	18700000	18100000	18900000	18300000	17100000	19700000
P0DJI8	P0DJI8;P0DJI9	SAA1_HUMAN	SAA1	Serum amyloid A-1 protein	920575	1230000	1270000	1110000	1580000	2370000	2000000	1580000	1260000	772852	771775	1290000	434452	547916	485238	525075	568058	992294	381098	510994	695615	1020000	756758	633340	292469	702990	932487	953072	1100000	2500000	1440000	839967	809472	709937	781214	1590000	1310000	1020000	725830	810844	1450000	5830000	506271	948364	733429
P0DMV8;P0DMV9	P0DMV8;P0DMV9;P34931	HS71A_HUMAN;HS71B_HUMAN	HSPA1A;HSPA1B	Heat shock 70 kDa protein 1A	1200000	1370000	1850000	1900000	1870000	1710000	1720000	1360000	1370000	930981	829503	835764	1130000	922571	1020000	983518	864429	1000000	1070000	999498	1280000	973747	997435	819331	1270000	1000000	1010000	1190000	1180000	1140000	1160000	1330000	1130000	1080000	1250000	821372	926423	863544	882154	1050000	955192	973955	885688	942866	1090000
P0DOY3	P0DOY3	IGLC3_HUMAN	IGLC3	Immunoglobulin lambda constant 3	19600000	19900000	30300000	23700000	26600000	21000000	18600000	18700000	18900000	20000000	21600000	18800000	27100000	25500000	25100000	26700000	23900000	26700000	25700000	26200000	27100000	27900000	26600000	24400000	17000000	17300000	16900000	16500000	17600000	16400000	17500000	17200000	17000000	14900000	16100000	14200000	15400000	16800000	15700000	15600000	14800000	15000000	17900000	16400000	17000000
P0DP01	P0DP01	HV108_HUMAN	IGHV1-8	Immunoglobulin heavy variable 1-8	14800000	14000000	23000000	20000000	21400000	13500000	18300000	21900000	17300000	16200000	14900000	15000000	25500000	24900000	29900000	26700000	23100000	27400000	27300000	30700000	27100000	25300000	26600000	21500000	19600000	23500000	22900000	21100000	21500000	22500000	22600000	21900000	21600000	18300000	21600000	17800000	28000000	25000000	36800000	23200000	27400000	26400000	27400000	25000000	25700000
P0DP08	P0DP08	HVD82_HUMAN	IGHV4-38-2	Immunoglobulin heavy variable 4-38-2	1970000	1020000	1710000	2590000		2640000	2800000	3150000	2620000	2530000		2560000	343811	429765	392446	432719	348874	431292	448116	475905	477032	382292	383553	303070	268914	331943	288698	285914		394098	261339	360920	267929	276081	255349		207854	274494	231013	215712	246678	253173	282319	265707
P0DP23;P0DP24;P0DP25	P0DP23;P0DP24;P0DP25;P27482	CALM1_HUMAN;CALM2_HUMAN;CALM3_HUMAN	CALM1;CALM2;CALM3	Calmodulin-1	89500000	95700000	128000000	132000000	148000000	89400000	102000000	143000000	112000000	122000000	128000000	113000000	107000000	104000000	112000000	120000000	111000000	106000000	103000000	109000000	92200000	104000000	93200000	105000000	98700000	118000000	131000000	91700000	107000000	100000000	113000000	106000000	120000000	96800000	104000000	106000000	100000000	108000000	147000000	117000000	122000000	105000000	115000000	110000000	101000000
P10153	P10153	RNAS2_HUMAN	RNASE2	Non-secretory ribonuclease	5150000	5290000				2600000	2790000	4370000		2980000	16400000	17000000	11800000	6900000	2570000	5170000		2500000		10900000	2600000	2750000	2490000	2340000	5070000	3030000	1800000	3240000				3570000		4030000	3360000	3450000	4280000	2470000	6730000	5300000	2500000			2530000	6690000
P10586	P10586	PTPRF_HUMAN	PTPRF	Receptor-type tyrosine-protein phosphatase F	93100000	75900000	20700000	93600000	49600000	29800000	40100000	101000000	58600000	124000000	117000000	117000000	113000000	112000000	103000000	104000000	112000000	88100000	75400000	104000000	85600000	92600000	88100000	87700000	103000000	86200000	85800000	75100000	72200000	91100000	99500000	67500000	97700000	80500000	88700000	90300000	103000000	94500000	65800000	100000000	101000000	103000000	104000000	92000000	119000000
P10599	P10599	THIO_HUMAN	TXN	Thioredoxin	1580000	1660000	1470000		2090000	1060000	627651	729659		829440	1070000	3510000		1170000		1350000		3460000	1250000	1340000	1730000	1460000	1550000		1390000	1330000	1380000	1660000	1280000	1570000	1640000	1400000	2000000		1410000		1890000	829766	1510000	1510000	1230000	1370000	1870000	1420000	1300000
P10619	P10619	PPGB_HUMAN	CTSA	Lysosomal protective protein	137263	137634		55114.7	66846.7					80099.4	139148	121723	282836	195917	280379	84434.5		171126	146621	109366		185942	82318.8	111635	364590	96776.5	533445		78328.4	73140.7	434751	314040	71245.9	267763	820679	678043	183226		186357	126949	84179.2	99576.8	74984.9	32535.3	28045.3
P10643	P10643	CO7_HUMAN	C7	Complement component C7	35400000	41000000	45800000	35300000	43400000	37200000	38200000	37000000	40600000	40000000	41300000	36900000	55800000	52400000	54300000	55500000	54400000	60900000	55900000	57600000	56000000	56800000	56200000	50500000	40300000	38400000	41800000	41400000	44900000	39100000	40400000	44100000	41000000	39000000	40700000	36700000	49100000	50300000	51100000	50800000	49500000	51800000	52400000	53100000	53000000
P10645	P10645	CMGA_HUMAN	CHGA	Chromogranin-A	932655		1170000	1110000	1220000			762612	1060000	945813	649184	635636	1080000	843666	923510	787081	923281	948092	1000000	939194	820683	906792	920608	820219	974352	838670	858541	925171	995239	865052	889710	869421	836757	958080	1010000	887600	855184	999532	835348	1130000	952281	1070000	887295	1070000	1530000
P10721	P10721	KIT_HUMAN	KIT	Mast/stem cell growth factor receptor Kit	6640000	10000000	8900000	5140000	11000000	5460000	7720000	6570000	8730000	8580000	8440000	7090000	10000000	8960000	9290000	8320000	7960000	8390000	9080000	7330000	7090000	8410000	7510000	8110000	6330000	5960000	6110000	6360000	6020000	6340000	5650000	6380000	6210000	7900000	5880000	7350000	6860000	7180000	7460000	6820000	6690000	7180000	6720000	7130000	8160000
P10909	P10909	CLUS_HUMAN	CLU	Clusterin	31300000	31300000	33700000	30600000	34900000	30600000	28300000	32300000	29900000	28400000	26900000	24700000	28400000	23100000	25800000	23400000	24100000	26700000	27800000	25400000	23100000	22300000	23200000	23700000	25800000	23800000	25900000	27000000	26400000	26400000	22600000	25600000	22100000	21300000	24200000	19500000	26200000	24900000	26600000	24500000	25800000	27100000	24600000	28700000	27800000
P11021	P11021	BIP_HUMAN	HSPA5	Endoplasmic reticulum chaperone BiP	136000000	137000000	191000000	138000000	135000000	127000000	126000000	137000000	136000000	142000000	132000000	140000000	130000000	117000000	117000000	129000000	118000000	126000000	121000000	126000000	129000000	138000000	125000000	121000000	113000000	126000000	125000000	122000000	132000000	117000000	124000000	128000000	126000000	122000000	120000000	118000000	139000000	127000000	138000000	127000000	128000000	125000000	133000000	138000000	113000000
P11047	P11047	LAMC1_HUMAN	LAMC1	Laminin subunit gamma-1	6040000								1160000	1580000	1810000		3820000	3780000	2840000	3690000	3470000	3180000	2860000	3200000	2570000	3160000	2930000	3390000	3450000	2760000	3200000	3500000	3670000	3350000	2910000	3370000	3300000	3760000	3550000	3750000	3560000	2720000	3340000	3740000	3050000	3380000		3270000	5220000
P11142	P0DMV8;P0DMV9;P11142;P17066;P34931;P54652;P48741	HSP7C_HUMAN	HSPA8	Heat shock cognate 71 kDa protein	71300000	80000000	73400000	83800000	84800000	92800000	81800000	61700000	74400000	87500000	68100000	57200000	62300000	59900000	53600000	63800000	63400000	71900000	69200000	66800000	70300000	67100000	58400000	67100000	72100000	59000000	63100000	70100000	72800000	70600000	61700000	62900000	61000000	66800000	66600000	57500000	57500000	60000000	66700000	64100000	73000000	65900000	53700000	61400000	74600000
P11226	P11226	MBL2_HUMAN	MBL2	Mannose-binding protein C	4350000	2410000	12700000	6720000	7730000	3250000	4000000	4580000	3780000	2500000	3660000	3460000	5250000	5140000	4820000	4530000	4540000	5150000	4670000	4930000	5110000	4760000	4870000	4860000	3260000	3760000	3920000	3720000	4260000	3670000	3390000	3500000	4040000	3600000	4360000	5400000	4840000	5360000	5050000	5220000	5740000	5240000	4960000	5290000	4690000
P11279	P11279	LAMP1_HUMAN	LAMP1	Lysosome-associated membrane glycoprotein 1	1240000	779002	917048	3670000	873743	135863	676316	126439	529517	777025	1660000	1450000	2450000	1710000	600095	1910000	1700000	678518	1850000	1470000	1840000	1820000	1560000	1810000	1490000	1400000	1770000	1270000	2080000	942307	1570000	898487	1940000	1430000	1910000	2450000	1270000	2420000	3380000	2540000	2170000	2190000	745927	828967	1790000
P11362	P11362	FGFR1_HUMAN	FGFR1	Fibroblast growth factor receptor 1	30900000	28700000	52900000	30700000	6730000	17600000	38000000	47200000	35800000	18200000	30900000	30900000	32100000	34100000	30400000	32800000	40900000	38000000	37000000	38100000	40100000	35300000	37800000	32100000	24300000	22800000	22700000	21300000	20500000	20800000	25900000	23400000	17200000	15700000	19800000	12900000	30400000	37700000	27300000	27500000	26900000	26200000	46300000	51300000	46300000
P11597	P11597	CETP_HUMAN	CETP	Cholesteryl ester transfer protein	14600000	6090000	7670000	19300000	11800000	9680000	6090000	22800000	17100000	36700000	12200000	13100000	21400000	16200000	15700000	14100000	28100000	21100000	18100000	13700000	14100000	19400000	15800000	17200000	12800000	11400000	12800000	12400000	16100000	12300000	15100000	15800000	12500000	15600000	14500000	12700000	16700000	11300000	10400000	14100000	13600000	17300000	10200000	13500000	14200000
P11717	P11717	MPRI_HUMAN	IGF2R	Cation-independent mannose-6-phosphate receptor	89400000	118000000	110000000	133000000	135000000	114000000	114000000	98300000	108000000	102000000	80200000	91500000	93300000	86000000	90800000	81600000	86300000	95800000	89300000	86200000	79200000	89300000	82100000	86000000	108000000	86300000	95500000	101000000	103000000	93700000	87300000	96500000	86700000	98200000	95500000	92000000	89800000	90400000	86000000	95200000	91800000	102000000	89300000	93600000	128000000
P12109	P12109	CO6A1_HUMAN	COL6A1	Collagen alpha-1(VI) chain	5600000	3470000	5580000	6370000	5510000	4360000	3950000	4400000	6490000	9190000	8900000	12500000	6120000	5330000	6440000	5610000	4230000	6250000	6500000	6060000	5380000	5860000	5350000	4630000	5410000	5480000	5020000	5630000	6600000	6170000	5520000	6300000	6040000	5300000	5580000	4920000	6260000	6420000	6070000	5680000	5760000	5940000	6120000	5870000	5480000
P12110	P12110	CO6A2_HUMAN	COL6A2	Collagen alpha-2(VI) chain	3880000	3530000	5780000	5150000	6190000	5060000	3190000	2750000	3440000	3060000	1120000	1790000	1220000	1760000	2410000	2370000	2120000	2510000	3060000	2620000	939448	2590000	2610000	3350000	3350000	2220000	2600000	4340000	2250000	3910000	4630000	2440000		4230000	872264	5010000	5350000	2340000	2950000	2080000	2650000	6080000	2590000	4400000	2460000
P12111	P12111	CO6A3_HUMAN	COL6A3	Collagen alpha-3(VI) chain	74000000	113000000	109000000	85900000	128000000	109000000	83000000	87100000	79000000	102000000	88300000	84600000	88700000	82500000	93300000	93800000	94200000	89800000	83800000	91000000	83000000	91800000	87100000	96400000	89000000	83000000	91500000	89900000	100000000	92600000	98900000	96100000	95400000	104000000	92100000	113000000	104000000	94100000	110000000	103000000	88800000	98400000	94500000	102000000	109000000
P12259	P12259	FA5_HUMAN	F5	Coagulation factor V	96100000	116000000	134000000	105000000	119000000	107000000	105000000	104000000	108000000	106000000	111000000	101000000	98400000	103000000	96000000	100000000	97900000	105000000	97500000	96200000	95900000	98400000	98000000	89100000	90300000	89500000	90400000	91000000	98800000	90100000	90400000	95500000	93600000	91200000	88400000	90900000	99500000	107000000	99300000	101000000	95700000	99500000	102000000	103000000	109000000
P12273	P12273	PIP_HUMAN	PIP	Prolactin-inducible protein	2200000	2570000	3670000	2940000	4010000	3010000	3370000	3790000	3870000	2740000	2110000	4060000	3690000	6300000	5810000	6370000	6780000	5930000	6790000	5770000	6220000	5180000	5850000	2920000	5620000	8390000	5800000	6090000	7530000	6970000	7770000	7700000	7720000	6420000	7300000	2570000	6670000	8460000	5200000	4930000	5000000	4730000	5910000	5480000	5660000
P12318;P31995	P12318;P31994;P31995	FCG2A_HUMAN;FCG2C_HUMAN	FCGR2A;FCGR2C	Low affinity immunoglobulin gamma Fc region receptor II-a	10600000	17000000	16800000	11600000	10200000	13700000	13100000	11800000	17000000	4440000	16700000	14300000	14800000	13900000	11800000	15500000	11800000	13100000	13000000	11600000	11000000	10800000	13900000	12600000	14200000	10400000	12400000	11500000	13800000	10100000	10700000	11200000	18900000	14300000	13400000	13300000	8190000	12600000	13700000	11200000	11200000	15000000	13000000	11700000	15300000
P12814	P12814	ACTN1_HUMAN	ACTN1	Alpha-actinin-1	22200000	21900000	26300000	18500000	24000000	19800000	19100000	16400000	17300000	23500000	21600000	18700000	16300000	15100000	15300000	15600000	15800000	16200000	14800000	14000000	15300000	16300000	13800000	15400000	15300000	14100000	15800000	15400000	14500000	15200000	14400000	15000000	16100000	13900000	14900000	14700000	15300000	15800000	16500000	15200000	15600000	16300000	15200000	14700000	15000000
P12821	P12821	ACE_HUMAN	ACE	Angiotensin-converting enzyme	45500000	56400000	54600000	44800000	46700000	47000000	46600000	43500000	36100000	40200000	42000000	45000000	38100000	35500000	33300000	34600000	38000000	37400000	37900000	38000000	37800000	37400000	32000000	35600000	36800000	34600000	33800000	37800000	38900000	37300000	33300000	37700000	37400000	44600000	37200000	44400000	35200000	33600000	36000000	36300000	37000000	41300000	36200000	37700000	39300000
P12830	P12830	CADH1_HUMAN	CDH1	Cadherin-1	14300000	17000000	6430000	12400000	12000000	16100000	14600000	11700000	14600000	16200000	16900000	15400000	8070000	10900000	10400000	10100000	9750000	9660000	8240000	8580000	7880000	7600000	8700000	8090000	10200000	9000000	10800000	10600000	11000000	10100000	10200000	10400000	8650000	10000000	9680000	9710000	9230000	10100000	11200000	11900000	11000000	11300000	10200000	11400000	14200000
P12955	P12955	PEPD_HUMAN	PEPD	Xaa-Pro dipeptidase	6610000	9760000	10500000	8290000	10800000	9080000	8460000	7620000	8370000	9170000	7940000	7190000	8530000	7490000	9190000	8180000	8580000	9440000	8240000	8170000	8740000	8480000	8690000	8180000	7980000	7410000	7890000	8320000	8210000	7070000	7610000	8550000	7680000	7200000	7450000	6060000	8290000	8560000	8010000	8510000	8670000	8900000	8500000	8290000	9690000
P13489	P13489	RINI_HUMAN	RNH1	Ribonuclease inhibitor	753741	461803	790657	571198	645554	553040	507829	696834	610655	263361	196285	230934	880720	562569	728070	411369	542243	550812	770296	932679	671961	532293	724603	620725	1060000	851902	748094	898805	487081	1290000	543076	844168	606753	601685	946153	706825	438517	524597	322779	534176	476883	500241	453245	498960	500093
P13591	P13591	NCAM1_HUMAN	NCAM1	Neural cell adhesion molecule 1	28400000	36600000	36200000	29200000	31500000	29200000	26700000	27200000	27700000	30700000	31200000	30900000	33500000	31200000	32400000	28300000	33800000	31800000	29700000	32600000	28600000	23300000	24900000	30500000	26200000	21200000	25800000	25300000	22800000	17900000	26400000	24600000	23600000	25200000	26400000	24300000	31700000	30700000	30000000	34300000	30300000	32700000	29600000	39500000	35400000
P13598	P13598	ICAM2_HUMAN	ICAM2	Intercellular adhesion molecule 2	11000000	993057		753287		13300000	843136		12200000	9970000	10500000	9620000	12000000	13100000	13000000	17300000	11600000	16300000	12900000	15000000	17500000	17100000	17300000	10100000	7530000	9610000	13500000	10000000	10800000	10200000	11500000	10100000	7910000	6320000	9770000	4630000	9210000	11800000	13700000	12100000	10100000	10000000	9980000	13600000	12500000
P13645	P13645	K1C10_HUMAN	KRT10	Keratin, type I cytoskeletal 10	19100000	22200000	22800000	19900000	12700000	20500000	21900000	15800000	18000000	20600000	21200000	19900000	16900000	15700000	16600000	23400000	13600000	18600000	17300000	17400000	34500000	24900000	15400000	15600000	17100000	14700000	15100000	17500000	18000000	19500000	13800000	21900000	18400000	17300000	17400000	17900000	16600000	17000000	16000000	18500000	17500000	18400000	15800000	14400000	18900000
P13647	P13647	K2C5_HUMAN	KRT5	Keratin, type II cytoskeletal 5	46900000	27900000	31200000	35100000	10000000	31900000	32700000	31900000	26900000	23400000	28600000	22700000	29700000	37100000	35400000	28400000	34400000	31000000	28000000	20400000	33400000	17600000	25000000	28600000	22100000	16100000	30800000	32400000	21300000	23700000	33800000	18000000	22600000	24000000	36800000	25900000	22500000	25000000	28300000	23600000	29100000	26900000	20300000	26800000	32700000
P13667	P13667	PDIA4_HUMAN	PDIA4	Protein disulfide-isomerase A4	5790000	6720000						1600000	5050000	5620000	4990000	4730000		4050000			3780000	3840000		3660000	3580000	4140000	4070000	3990000	4600000		4610000	4990000			4420000	1280000	4980000	1450000	4640000	1480000		4140000	4490000	1800000			4090000	4340000	5890000
P13671	P13671	CO6_HUMAN	C6	Complement component C6	70800000	73900000	94500000	78300000	96600000	79900000	76000000	77100000	70500000	71200000	69700000	65800000	55600000	57900000	54500000	55800000	54700000	61500000	56600000	58900000	59400000	59100000	59000000	53700000	54600000	54700000	58900000	57100000	61300000	55200000	56700000	58200000	56700000	52600000	51300000	50800000	62900000	61500000	69300000	65100000	64300000	68600000	63500000	64100000	60600000
P13716	P13716	HEM2_HUMAN	ALAD	Delta-aminolevulinic acid dehydratase	2750000	2560000	2610000	1960000	2820000	2080000	1200000	2190000	911440	1800000	2120000	1440000	2790000	2270000	2760000	2070000	2690000	2480000	3380000	2720000	2780000	2670000	2840000	2700000	3850000	2840000	1790000	2680000	1950000	3730000	1330000	2850000	2700000	2470000	3210000	3560000	2250000	2750000	2130000	2700000	2400000	2690000	2650000	2920000	2500000
P13727	P13727	PRG2_HUMAN	PRG2	Bone marrow proteoglycan	560000000	434000000	416000000	426000000	523000000	481000000	415000000	526000000	446000000	556000000	569000000	529000000	461000000	449000000	465000000	496000000	490000000	452000000	463000000	443000000	466000000	500000000	466000000	483000000	508000000	440000000	500000000	413000000	483000000	371000000	448000000	418000000	505000000	500000000	551000000	613000000	558000000	557000000	548000000	437000000	433000000	439000000	456000000	427000000	406000000
P13796	P13796;P13797	PLSL_HUMAN	LCP1	Plastin-2	27000000	26000000	35900000	23000000	20300000	24300000	23400000	30000000	27400000	20700000	24500000	21300000	25300000	24900000	25400000	26200000	23300000	24900000	25400000	25300000	25700000	22200000	23500000	24600000	24700000	27000000	25000000	26800000	25000000	26900000	24400000	28000000	25400000	27500000	27400000	23600000	27100000	24700000	30900000	26700000	27100000	27400000	28300000	27700000	32100000
P14151	P14151	LYAM1_HUMAN	SELL	L-selectin	176000000	190000000	207000000	167000000	145000000	167000000	172000000	199000000	202000000	199000000	205000000	179000000	193000000	214000000	198000000	203000000	202000000	203000000	201000000	192000000	184000000	196000000	208000000	185000000	221000000	217000000	207000000	206000000	202000000	214000000	207000000	219000000	207000000	211000000	235000000	219000000	215000000	209000000	206000000	207000000	211000000	209000000	220000000	211000000	203000000
P14314	P14314	GLU2B_HUMAN	PRKCSH	Glucosidase 2 subunit beta	1910000	2250000	3000000	2070000	4040000	2170000	2030000	1730000	1720000	2200000	2570000	2040000	1780000	1950000	1750000	1800000	2210000	1920000	1880000	1660000	2150000	1900000	1960000	1760000	2010000	1730000	2290000	2110000	2230000	1690000	2080000	2170000	2060000	1580000	2340000	2150000	2020000	2180000	2470000	2290000	2450000	2860000	2280000	2490000	2710000
P14543	P14543	NID1_HUMAN	NID1	Nidogen-1	10900000	10600000	15400000	11000000	14900000	8050000	10700000	11700000	10900000	10400000	12900000	10400000	12500000	10900000	12400000	10400000	11800000	11300000	10100000	9990000	10900000	10500000	10000000	10500000	12700000	11100000	10100000	11200000	9610000	12200000	11300000	11200000	10800000	8310000	7990000	5800000	8540000	9300000	10600000	9620000	11700000	9760000	9670000	10600000	9790000
P14618	P14618	KPYM_HUMAN	PKM	Pyruvate kinase PKM	5230000	3720000	5250000	4660000	5220000	3580000	4430000	3300000	4610000	5360000	5980000	5690000	3710000	4820000	4610000	5580000	4450000	4980000	4980000	3970000	4290000	5090000	4840000	4860000	5200000	4470000	4530000	4760000	5550000	4580000	3860000	5000000	5010000	5460000	4760000	5060000	5110000	5250000	5490000	5550000	5570000	4930000	5440000	5480000	6360000
P14625	P14625	ENPL_HUMAN	HSP90B1	Endoplasmin	25900000	26600000	15000000	14300000	27400000	20100000	15900000	22100000	11900000	22400000	23800000	18300000	25600000	27500000	27000000	29500000	28500000	32700000	29100000	29300000	27600000	28800000	29000000	27200000	27300000	29500000	24000000	24700000	25700000	23700000	24800000	23400000	25700000	22300000	25300000	21700000	26700000	27100000	28300000	28800000	24900000	35100000	30100000	28500000	24400000
P14923	P14923	PLAK_HUMAN	JUP	Junction plakoglobin	106000000	64700000	58700000	140000000	56100000	59600000	91000000	77800000	73900000	65000000	72600000	21000000	106000000	3710000	47700000	45000000	36900000	7650000	81500000	4200000	7220000	37900000	50200000	47300000	63300000	26300000	35000000	34800000	54600000	31300000	53200000	7630000	21100000	17400000	75300000	3510000	79700000	37600000	38700000	69600000	56800000	46800000	58200000	51300000	36200000
P15144	P15144	AMPN_HUMAN	ANPEP	Aminopeptidase N	174000000	210000000	183000000	172000000	201000000	206000000	202000000	201000000	201000000	176000000	185000000	176000000	204000000	191000000	203000000	185000000	184000000	201000000	186000000	214000000	216000000	193000000	213000000	191000000	211000000	186000000	196000000	203000000	213000000	216000000	200000000	203000000	188000000	168000000	215000000	158000000	166000000	186000000	181000000	177000000	185000000	181000000	190000000	184000000	179000000
P15151	P15151	PVR_HUMAN	PVR	Poliovirus receptor	3100000	3980000	4470000	3300000	4230000	3050000	2790000	2420000	2720000	3110000	2860000	2630000	2380000	2250000	2570000	2180000	2140000	2250000	1860000	1950000	1920000	1980000	1980000	1880000	2180000	1910000	2180000	2250000	2210000	2120000	2380000	2280000	2110000	2260000	2140000	2140000	2290000	1990000	1990000	2140000	2060000	2240000	1890000	2070000	3300000
P15169	P15169	CBPN_HUMAN	CPN1	Carboxypeptidase N catalytic chain	4160000	5360000	6680000	4730000	6620000	5170000	5560000	6170000	4990000	4830000	4760000	3760000	3440000	4030000	4130000	3850000	3800000	4080000	3900000	4020000	3910000	4170000	4530000	3660000	3620000	3760000	3400000	3360000	3390000	3920000	3250000	3400000	3040000	2860000	3240000	2800000	2020000	2710000	2300000	2770000	2730000	2610000	2600000	2600000	2570000
P15531;P22392	P15531;P22392;O60361	NDKA_HUMAN;NDKB_HUMAN	NME1;NME2	Nucleoside diphosphate kinase A	12400000	8590000	7160000	8620000	8630000	8540000	8220000	7440000	6720000	7490000	5990000	6610000	5930000	5270000	5200000	5500000	6910000	5650000	5160000	5120000	6950000	4700000	5440000	5190000	5960000	5890000	7050000	6280000	6980000	4130000	5690000	5870000	6480000	5140000	5970000	7090000	6920000	6880000	7410000	5860000	6190000	6190000	6860000	6210000	5660000
P15814	P15814	IGLL1_HUMAN	IGLL1	Immunoglobulin lambda-like polypeptide 1	16000000	23200000	27600000	24000000	28000000	22500000	21600000	22300000	23800000	24800000	26500000	23000000	28900000	25900000	24600000	27700000	25500000	28800000	27200000	26800000	26900000	28500000	28300000	25600000	15600000	16100000	17100000	17800000	18000000	16100000	17300000	16800000	16800000	16000000	16700000	17100000	14300000	14300000	15300000	13200000	13200000	14200000	16800000	15200000	17400000
P15924	P15924	DESP_HUMAN	DSP	Desmoplakin	132000000	128000000	93900000	157000000	41100000	174000000	208000000	154000000	158000000	182000000	295000000	308000000	101000000	128000000	138000000	246000000	139000000	160000000	57400000	70300000	148000000	168000000	153000000	140000000	83700000	122000000	184000000	125000000	166000000	82800000	170000000	133000000	192000000	143000000	80700000	133000000	244000000	149000000	219000000	154000000	167000000	167000000	154000000	156000000	203000000
P16070	P16070	CD44_HUMAN	CD44	CD44 antigen	4640000	4950000	6380000	10500000	6770000	4600000	4380000	4720000	4750000	8920000	4590000	4590000	4820000	9860000	9310000	5330000	4330000	4590000	4180000	3710000	4880000	4220000	9370000	4230000	4190000	4010000	4360000	4700000	5420000	4770000	3980000	4880000	4870000	3340000	4550000	4290000	4650000	5150000	5550000	5530000	5010000	5500000	6930000	6320000	3880000
P16403	P10412;P16402;P16403	H12_HUMAN	H1-2	Histone H1.2	5430000	8740000	9170000	5100000	6460000	6480000	6020000	6740000	5720000	4560000	5000000	5120000	4510000	3760000	4830000	4600000	4940000	5140000	3640000	3140000	3880000	4710000	3700000	4200000	2650000	2220000	4390000	4650000	4760000	2740000	4050000	3560000	4350000	5140000	3250000	3480000	6170000	4890000	5330000	5420000	5750000	6130000	4820000	5420000	5680000
P16930	P16930	FAAA_HUMAN	FAH	Fumarylacetoacetase	21000000	13400000	32300000	30800000	37100000	29600000	28000000	10500000	12400000	31400000	34400000	29100000	27400000	22900000	27200000	25300000	24100000	25000000	21800000	18300000	21600000	26300000	21500000	22500000	15300000	17700000	24700000	21500000	29700000	17100000	19900000	18300000	22800000	21700000	18100000	19500000	26900000	23200000	35000000	26700000	28900000	30200000	25800000	24000000	29300000
P17174	P17174	AATC_HUMAN	GOT1	Aspartate aminotransferase, cytoplasmic	4670000	27100000	15500000	4330000	6600000	47700000	7510000	8950000	97200000	3990000	5670000	9210000	11200000	10800000	12500000	13600000	12000000	11200000	10300000	12500000	11700000	11000000	11200000	9730000	9180000	10200000	8740000	10700000	9910000	11500000	11800000	9520000	10000000	10800000	8960000	11900000	9290000	10500000	9730000	9780000	9960000	7890000	8120000	10200000	11000000
P17813	P17813	EGLN_HUMAN	ENG	Endoglin	2160000	2310000	3270000	2970000	3600000	2630000	2820000	3200000	2790000	2730000	2710000	2310000	2040000	2200000	2150000	2290000	2180000	2540000	2320000	2170000	2360000	2100000	4010000	1950000	2330000	3060000	2520000	2640000	2380000	2340000	2440000	2610000	2080000	1810000	2370000	1800000	2510000	2650000	2720000	2590000	2610000	2400000	2730000	2770000	2330000
P17900	P17900	SAP3_HUMAN	GM2A	Ganglioside GM2 activator	5180000	5320000	6420000	4620000	6530000	4940000	4790000	4200000	5110000	5910000	4280000	4980000	4750000	4610000	4990000	5040000	4980000	3010000	4910000	4360000	4380000	4990000	4770000	3480000	4010000	3450000	3850000	4160000	4180000	3990000	4100000	4200000	4320000	4720000	4150000	1520000	3940000	4360000	4910000	4740000	4670000	5230000	4810000	4710000	6150000
P17936	P17936	IBP3_HUMAN	IGFBP3	Insulin-like growth factor-binding protein 3	11800000	13900000	12600000	11400000	13300000	11600000	11200000	11000000	13100000	8710000	8220000	7080000	8960000	9140000	9640000	9320000	8990000	9860000	10300000	10400000	9240000	9000000	9580000	7990000	9060000	9140000	8770000	8420000	7900000	7280000	8480000	8690000	8230000	6630000	7350000	6880000	9040000	9100000	9500000	9630000	9440000	9380000	9020000	10200000	10100000
P18065	P18065	IBP2_HUMAN	IGFBP2	Insulin-like growth factor-binding protein 2	7190000	8290000	7680000	6110000	7960000	6000000	6220000	5260000	6360000	6860000	6900000	6200000	3860000	4140000	3840000	3590000	4180000	4060000	4540000	4310000	3530000	3810000	3320000	4240000	5330000	5090000	5670000	5280000	5310000	5160000	4520000	6080000	4350000	5540000	4970000	5800000	5160000	5170000	6300000	5970000	6110000	6340000	5190000	5900000	6330000
P18206	P18206	VINC_HUMAN	VCL	Vinculin	33800000	37600000	38600000	35300000	38300000	34200000	33500000	28100000	30000000	33200000	34000000	29600000	24500000	25300000	25000000	25400000	26400000	28100000	27700000	27600000	26000000	24800000	26000000	26100000	26600000	24900000	25500000	27300000	28700000	26000000	25400000	26900000	27000000	27600000	26400000	24400000	26300000	27000000	28900000	28100000	27400000	29400000	28000000	28500000	31700000
P18428	P18428	LBP_HUMAN	LBP	Lipopolysaccharide-binding protein	26500000	21900000	34200000	30100000	33400000	30200000	23900000	23500000	23000000	21600000	22400000	23100000	23600000	22900000	24400000	21900000	24200000	23200000	22200000	21900000	20900000	21400000	23000000	21300000	27600000	27700000	29300000	28100000	28300000	30900000	28900000	26800000	25600000	23500000	25800000	24900000	26100000	26500000	25500000	27200000	26900000	35300000	24300000	24900000	24300000
P18669	P18669	PGAM1_HUMAN	PGAM1	Phosphoglycerate mutase 1	13000000	19200000	22800000	17300000	22300000	17500000	17300000	14500000	17700000	26700000	23600000	21200000	10500000	13200000	11500000	17900000	14200000	14900000	7400000	8680000	14200000	19300000	11500000	16600000	8220000	8970000	10700000	10300000	14700000	23200000	12600000	11100000	14600000	14500000	10500000	13100000	14800000	12700000	17200000	14300000	14000000	14300000	13800000	13200000	19700000
P19021	P19021	AMD_HUMAN	PAM	Peptidyl-glycine alpha-amidating monooxygenase	3130000	3090000	3680000	2110000	2900000	2420000	2570000	2140000	2470000	2470000	2160000	2010000	1700000	1500000	1540000	1430000	1590000	3950000	1280000	1400000	997532	1250000	926451	972500	1430000	1530000	1430000	1280000	1740000	1390000	1330000	1510000	1500000	1520000	1510000	1440000	1420000	1420000	2000000	1110000	1450000	1540000	1380000	1240000	1200000
P19256	P19256	LFA3_HUMAN	CD58	Lymphocyte function-associated antigen 3	1680000	2730000	2920000	1340000	2430000	1320000	1330000	2340000	1310000	2000000	2300000	1430000	2380000	2040000	2230000	1910000	2200000	2020000	2170000	1940000	1690000	2190000	1530000	2200000	1580000	2060000	1470000	1920000	1780000	2140000	1990000	2170000	1790000	2520000	1970000	2770000	1880000	2010000	1930000	2270000	2090000	2540000	2180000	2300000	1960000
P19320	P19320	VCAM1_HUMAN	VCAM1	Vascular cell adhesion protein 1	506000000	594000000	399000000	597000000	666000000	464000000	514000000	433000000	490000000	473000000	506000000	450000000	379000000	349000000	332000000	360000000	413000000	376000000	366000000	362000000	346000000	381000000	352000000	386000000	403000000	354000000	380000000	388000000	406000000	369000000	379000000	376000000	391000000	418000000	398000000	425000000	421000000	406000000	441000000	440000000	417000000	430000000	420000000	393000000	436000000
P19652	P19652	A1AG2_HUMAN	ORM2	Alpha-1-acid glycoprotein 2	20200000	25200000	30900000	24000000	35800000	24000000	25000000	27200000	26300000	21600000	21100000	21900000	15800000	17900000	17000000	18000000	16400000	17400000	16300000	16000000	17900000	15600000	18000000	17100000	14400000	17600000	16900000	17100000	18200000	15300000	16500000	17400000	17600000	17700000	16500000	17600000	28800000	30800000	28800000	27500000	32800000	30300000	29500000	29200000	27400000
P19823	P19823	ITIH2_HUMAN	ITIH2	Inter-alpha-trypsin inhibitor heavy chain H2	102000000	114000000	133000000	106000000	145000000	109000000	114000000	115000000	113000000	105000000	108000000	104000000	100000000	103000000	99100000	102000000	103000000	110000000	106000000	108000000	109000000	101000000	105000000	97900000	84500000	87600000	86200000	86900000	94500000	86200000	89100000	92100000	86500000	80500000	83200000	71100000	88200000	101000000	102000000	97000000	103000000	99100000	101000000	107000000	98600000
P19827	P19827	ITIH1_HUMAN	ITIH1	Inter-alpha-trypsin inhibitor heavy chain H1	306000000	327000000	400000000	329000000	413000000	348000000	342000000	352000000	333000000	297000000	285000000	291000000	263000000	289000000	274000000	277000000	277000000	306000000	298000000	284000000	299000000	275000000	291000000	253000000	267000000	278000000	265000000	272000000	286000000	274000000	276000000	282000000	264000000	249000000	268000000	228000000	287000000	320000000	305000000	303000000	314000000	293000000	318000000	330000000	310000000
P20023	P20023	CR2_HUMAN	CR2	Complement receptor type 2	1410000	2310000	1580000	1320000	2070000	1650000	1160000	1540000	1230000	2020000	2090000	1800000	1430000	1590000	1220000	1640000	1690000	954789	1580000	1380000	1340000	1510000	1480000	987458	1330000	1260000	1360000	1410000	1570000	1580000	1520000	1370000	1440000	1340000	1540000	1690000	1580000	1340000	1660000	1610000	1700000	2010000	1480000	1630000	1900000
P20618	P20618	PSB1_HUMAN	PSMB1	Proteasome subunit beta type-1	97200000	84400000	8920000	80100000	28900000	66400000	58800000	59500000	53600000	48300000	20800000	46200000	55100000	74700000	53800000	59000000	74100000	58900000	58600000	60700000	50300000	56700000	54000000	60700000	67300000	42300000	43100000	48700000	50400000	49900000	47400000	49900000	42700000	49600000	49700000	49200000	45100000	54800000	39400000	51800000	50700000	47900000	46600000	49100000	60000000
P20742	P20742	PZP_HUMAN	PZP	Pregnancy zone protein	118000000	130000000	130000000	111000000	144000000	111000000	96300000	98000000	105000000	88800000	90500000	81800000	88400000	83400000	88200000	88400000	87900000	95400000	93100000	95300000	94600000	89500000	97700000	86400000	107000000	104000000	99000000	101000000	106000000	111000000	110000000	110000000	107000000	99000000	105000000	93800000	98800000	99900000	98900000	98400000	98700000	101000000	101000000	99000000	107000000
P20774	P20774	MIME_HUMAN	OGN	Mimecan	2570000	13700000	2540000	2590000	2620000	2860000	9960000	2960000	5130000	5890000	10400000	9510000	9700000	9630000	8020000	8180000	7870000	10200000	9340000	6660000	9780000	21700000	7170000	6530000	7740000	21800000	6690000	5770000	6440000	7600000	6690000	38500000	22400000		79200000	30600000		8230000	7620000	7580000	6960000	8350000	7980000	7940000
P20851	P20851	C4BPB_HUMAN	C4BPB	C4b-binding protein beta chain	51600000	62800000	84200000	67300000	92200000	67900000	57700000	64100000	60700000	63300000	61500000	63400000	46200000	48900000	51500000	54600000	50800000	58300000	52200000	51200000	54700000	56400000	50900000	47100000	50600000	57000000	59200000	54600000	61200000	55200000	59300000	61000000	58300000	51200000	53400000	48900000	66900000	64500000	73600000	65400000	68300000	69700000	65300000	68300000	63300000
P21333	P21333	FLNA_HUMAN	FLNA	Filamin-A	67200000	74500000	75200000	68800000	73600000	64000000	57500000	60200000	54900000	53900000	60900000	55400000	52200000	52000000	50600000	53900000	54600000	56700000	52500000	53700000	49300000	57700000	57800000	51400000	52200000	50800000	53600000	49800000	55100000	51000000	48000000	53300000	54800000	52700000	50600000	56400000	56100000	56100000	61900000	57300000	54900000	60500000	56900000	56700000	53400000
P22105	P22105	TENX_HUMAN	TNXB	Tenascin-X	62000000	61400000	75400000	66600000	69200000	62900000	57900000	66800000	54600000	48100000	42000000	41300000	53100000	47400000	47900000	41600000	50200000	45000000	40200000	44200000	42300000	46100000	41500000	41200000	42700000	44000000	40300000	41100000	40500000	44100000	39000000	46100000	39300000	42300000	43700000	43800000	38900000	48200000	48900000	47600000	47400000	52000000	47800000	48600000	50800000
P22352	P22352	GPX3_HUMAN	GPX3	Glutathione peroxidase 3	1450000	1350000	1980000	1680000	1960000	1700000	1840000	2000000	1720000	1370000	1350000	1340000	1800000	2120000	1980000	2140000	1870000	2180000	2100000	2260000	2370000	2390000	2460000	1860000	1510000	1770000	1820000	1690000	1780000	1600000	1730000	1690000	1580000	1320000	1640000	1180000	1810000	2190000	1940000	1860000	1760000	1770000	2240000	2030000	1870000
P22692	P22692	IBP4_HUMAN	IGFBP4	Insulin-like growth factor-binding protein 4	6800000	5560000	8670000	24000000	7560000	10500000	7520000	4530000	6730000	12000000	4840000	4760000	5510000	2350000	3070000	1840000	4510000	8570000	4880000	4890000	6990000	2620000	4270000	5210000	4270000	4550000	3220000	3870000	3230000	4710000	3320000	14100000	4500000	5000000	8760000	3290000	10300000	4050000	3220000	12000000	3850000	4620000	3860000	11100000	12700000
P22792	P22792	CPN2_HUMAN	CPN2	Carboxypeptidase N subunit 2	2020000	2430000	2820000	2340000	3110000	2540000	2240000	2350000	2250000	1760000	1970000	1860000	1390000	1350000	1410000	1370000	1370000	1400000	1530000	1400000	1360000	1320000	1360000	1240000	1310000	1350000	1290000	1320000	1300000	1300000	1270000	1370000	1300000	1180000	1280000	1220000	1390000	1430000	1320000	1360000	1330000	1440000	1370000	1450000	1510000
P22891	P22891	PROZ_HUMAN	PROZ	Vitamin K-dependent protein Z	30600000	33500000	39900000	31200000	40600000	32100000	32800000	28700000	31600000	27500000	37500000	28200000	21500000	18900000	20100000	22800000	20300000	23300000	20400000	21300000	20300000	21500000	19700000	19500000	26200000	24200000	29800000	26300000	31300000	23400000	29500000	26700000	30500000	26900000	25100000	26900000	34200000	35700000	40300000	37000000	36900000	37500000	40000000	35400000	37600000
P22897	P22897	MRC1_HUMAN	MRC1	Macrophage mannose receptor 1	1080000	1360000	1780000	1400000	2180000	2240000	1810000	3060000	2350000	1800000	2080000	2180000	1630000	1640000	1400000	1910000	1540000	1880000	1350000	1420000	1700000	1660000	1900000	1320000	1220000	1460000	1500000	1450000	1470000	1220000	1570000	1530000	1550000	1270000	1330000	1190000	2040000	1790000	2210000	1550000	1310000	1480000	1960000	1980000	1250000
P23083	P23083;A0A0C4DH31	HV102_HUMAN	IGHV1-2	Immunoglobulin heavy variable 1-2	13700000	13600000	15300000	13500000	15900000	11100000	12700000	13700000	13000000	10100000	10500000	11800000	9210000	8870000	8600000	8580000	9260000	9690000	9480000	8810000	8180000	8840000	9440000	8140000	8220000	6810000	7030000	6860000	7920000	6830000	6720000	6800000	6230000	7660000	7830000	5830000	6960000	7640000	7020000	8460000	7510000	8250000	8400000	8860000	11700000
P23142	P23142	FBLN1_HUMAN	FBLN1	Fibulin-1	177000000	176000000	249000000	181000000	239000000	191000000	175000000	178000000	180000000	168000000	166000000	160000000	241000000	236000000	247000000	231000000	229000000	230000000	252000000	266000000	260000000	248000000	257000000	222000000	203000000	163000000	200000000	198000000	190000000	190000000	199000000	174000000	163000000	144000000	160000000	136000000	205000000	194000000	190000000	182000000	187000000	172000000	185000000	192000000	201000000
P23284	P23284	PPIB_HUMAN	PPIB	Peptidyl-prolyl cis-trans isomerase B	10900000	10800000	9910000	9950000	6240000	7110000	8740000	7120000	7330000	7710000	10300000	15100000	10100000	6230000	7800000	6050000	8640000	5710000	4690000	7910000	3830000	7940000	4830000	7830000	5450000	7420000	6320000	6210000	5930000	6410000	9030000	8940000	6860000	9130000	5660000	7780000	8040000	7710000	9940000	5290000	6210000	6630000	8980000	4020000	5280000
P23470	P23470	PTPRG_HUMAN	PTPRG	Receptor-type tyrosine-protein phosphatase gamma													46097.8	42975.8	39712.9	43696.6	18744.9	24482.2		24916.7	30800	37530.5		24154	37110.4	34736.1	32867.2	31992.9	35874.6	34503	27779.9	34608.6	25883.4						28820.6		28103.3	24140.5		26221.8	44968.4
P23528	P23528;Q9Y281	COF1_HUMAN	CFL1	Cofilin-1	29500000	30200000	27100000	31800000	44200000	43400000	26400000	31200000	23000000	12900000	14100000	15200000	33300000	32700000	24500000	28900000	31800000	36400000	31900000	34800000	23000000	38800000	36700000	27700000	29800000	17700000	35600000	30700000	24900000	36000000	28100000	25400000	26400000	24500000	26900000	34700000	24400000	27100000	32200000	35300000	29400000	33900000	37600000	28400000	34600000
P24592	P24592	IBP6_HUMAN	IGFBP6	Insulin-like growth factor-binding protein 6		1400000		1340000	1580000		1110000	233948		293240		1190000		717811	912403	984642	925574	1300000	361934	1040000	850978	394902	357912	276842	803268	366079	955725	272500	981296	1250000	975288	993470	938240	237556	311323	239254	814778	923560	925556	898141	813997	1210000	1030000	949739	606724
P24593	P24593	IBP5_HUMAN	IGFBP5	Insulin-like growth factor-binding protein 5	14100000			2790000	2880000	556236	10300000	9200000	12900000	3310000	5110000	6050000	14300000	9740000		9680000	10200000	10700000	12000000	10500000	7790000	9870000	8630000	9020000	12700000	9540000	10500000	11200000	9120000	11100000	9510000	9660000	8210000	9580000	9290000	9520000	7910000	8840000	8060000	9150000	9350000	10000000	8890000	9630000	12200000
P24821	P24821	TENA_HUMAN	TNC	Tenascin	50600000	60300000	61600000	52300000	72700000	53500000	48300000	41400000	44300000	46100000	41800000	40200000	44600000	45800000	43900000	44700000	39500000	49300000	44400000	46700000	41000000	47600000	43500000	40900000	39800000	39700000	42500000	45500000	45100000	44100000	37500000	39000000	39600000	40700000	38800000	40100000	40800000	42500000	45100000	45400000	44400000	50900000	43700000	44700000	46400000
P25311	P25311	ZA2G_HUMAN	AZGP1	Zinc-alpha-2-glycoprotein	8060000	9870000	10900000	8470000	11800000	9370000	8960000	10100000	9430000	8650000	8830000	9060000	8300000	8690000	8160000	8600000	8450000	9160000	8610000	8570000	8490000	8260000	8650000	8170000	7860000	8880000	8350000	8200000	8870000	7860000	8440000	9410000	8480000	7700000	8360000	8080000	10400000	11100000	11700000	11600000	11700000	11800000	12100000	11500000	11600000
P25788	P25788	PSA3_HUMAN	PSMA3	Proteasome subunit alpha type-3	58300000	60600000	58500000	50900000	8590000	95900000	46100000	51400000		28000000	12700000	41600000	46100000	42200000	34800000	68500000	48900000	63100000	43700000	47500000	43900000	47400000	51400000	43900000	52000000	63000000	52400000	43100000	60500000	48200000	73600000	48500000	48600000	85600000	59800000	44500000	68500000	50500000	41000000	37700000	36200000	42700000	41700000	35200000	41400000
P26038	P15311;P26038;P35241	MOES_HUMAN	MSN	Moesin	7290000	6660000	6510000	7450000	8160000	7230000	6290000	7880000	6910000	9260000	7990000	7420000	9280000	7420000	7600000	8980000	10000000	11500000	8400000	9260000	9600000	11100000	8880000	10200000	9280000	7500000	9350000	8640000	10200000	8610000	7450000	8930000	7530000	6900000	7270000	7370000	8990000	8940000	7860000	8750000	8740000	11000000	8100000	8500000	10100000
P26447	P26447	S10A4_HUMAN	S100A4	Protein S100-A4	20600000	11600000	146000000	4680000	8550000	18800000	4340000	24100000	5640000	7050000	6800000	6050000	5130000	4310000	5310000	4640000	5350000	5200000	4750000	4200000	4410000	4960000	4680000	14600000	5880000	13000000	8670000	5530000	5890000	16300000	5310000	5740000	4780000	10400000	4760000	14000000	5600000	5290000	6500000	6200000	5880000	5100000	5050000	5900000	5870000
P26583	P09429;P26583;B2RPK0	HMGB2_HUMAN	HMGB2	High mobility group protein B2	54374.2	76791.1	87828.6	86237.3	85883.6	94136.6	114772	149401		46665.9	84351.3		81288.2	79162.1	150174	87432.2	130948	262075	111634	59897.5	180037	161471	130076	33933.2	87545.5	92756.8	43973	86124.4	79935.6	108702	72297.3	82483.5	67329.9	94396.8	61138.9	98163	87517.6	70908.4	69426.7	81649.5	97019.4	91325.7	46070.4	43655.9	61931.6
P26927	P26927;Q2TV78	HGFL_HUMAN	MST1	Hepatocyte growth factor-like protein	143000000	97000000	166000000	154000000	150000000	116000000	141000000	120000000	86000000	84400000	115000000	99600000	136000000	141000000	143000000	135000000	154000000	160000000	141000000	132000000	136000000	156000000	137000000	129000000	158000000	113000000	145000000	142000000	150000000	177000000	137000000	148000000	131000000	135000000	142000000	147000000	163000000	140000000	152000000	164000000	149000000	179000000	153000000	152000000	165000000
P27169	P27169	PON1_HUMAN	PON1	Serum paraoxonase/arylesterase 1	7180000	7260000	10500000	7980000	10100000	8570000	8590000	9060000	8400000	7800000	8140000	7400000	4610000	4730000	4990000	4750000	4950000	5030000	4900000	4910000	5120000	4640000	4270000	4350000	5820000	7020000	6680000	6420000	6490000	6420000	6770000	7280000	6680000	5490000	6610000	6210000	7990000	8740000	8710000	8400000	9110000	8360000	8660000	8960000	7870000
P27487	P27487	DPP4_HUMAN	DPP4	Dipeptidyl peptidase 4	6450000	6140000	8000000	5740000	7270000	5150000	5230000	5570000	6030000	4780000	4200000	4430000	5240000	4860000	5620000	4700000	5570000	5750000	5980000	5340000	5190000	5940000	6270000	5580000	6540000	6080000	6830000	6100000	6670000	5390000	6970000	6700000	5880000	5640000	6670000	7010000	6900000	7210000	5500000	7100000	6490000	6720000	6610000	7690000	6300000
P27797	P27797	CALR_HUMAN	CALR	Calreticulin	363000000	348000000	5060000	275000000	4230000	279000000	297000000	268000000	278000000	317000000	343000000	290000000	272000000	294000000	232000000	325000000	542000000	270000000	268000000	594000000	243000000	212000000	203000000	252000000	252000000	222000000	260000000	227000000	222000000	236000000	259000000	243000000	239000000	240000000	225000000	317000000	524000000	268000000	562000000	320000000	245000000	334000000	533000000	206000000	335000000
P27918	P27918	PROP_HUMAN	CFP	Properdin	9740000	15300000	9400000	11800000	13800000	11600000	9920000	9960000	8850000	13200000	12900000	9550000	9920000	8080000	11400000	8970000	9960000	10300000	9440000	11100000	10400000	11000000	10400000	8230000	10800000	9390000	10600000	10600000	11400000	11000000	9940000	11600000	10100000	10400000	10700000	8140000	10800000	10400000	11900000	12400000	13800000	12500000	9170000	12000000	17000000
P27930	P27930	IL1R2_HUMAN	IL1R2	Interleukin-1 receptor type 2	964506	1110000	969139	825852	962091	749790		729387	632441	1520000	1080000	823502	697217	2320000	1170000	669515	2170000	2570000	2210000	2330000	1130000	2210000	768271	2570000	2430000	2290000	2230000	2060000	2020000	2390000	2200000	1630000	1860000	1780000	2050000	2370000	1090000	2390000	2240000	2470000	2380000	3280000	2540000	2690000	661934
P28066	P28066	PSA5_HUMAN	PSMA5	Proteasome subunit alpha type-5	1110000	2100000	1700000	1530000	2220000	2100000	1410000	1690000	1410000	1610000	1540000	1700000	1670000	1660000	1530000	1800000	1940000	1560000	1480000	1550000	1470000	1210000	1660000	1420000	1730000	1840000	2360000	1580000	2120000	1570000	1640000	1940000	2030000	2870000	1620000	2550000	1500000	1760000	2360000	2390000	1490000	2110000	2030000	2190000	2350000
P28827	P28827	PTPRM_HUMAN	PTPRM	Receptor-type tyrosine-protein phosphatase mu	2820000	3240000	3340000	2380000	3080000	2810000	2610000	2650000	2280000	2360000	2040000	2500000	1840000	2600000	1990000	2280000	2160000	2740000	2330000	2350000	2270000	2240000	2320000	1940000	2120000	2490000	2260000	2490000	2520000	2160000	2920000	2560000	2460000	2190000	2000000	1230000	2330000	2770000	2420000	2840000	2810000	3070000	3270000	3140000	2110000
P29401	P29401	TKT_HUMAN	TKT	Transketolase	7130000	32700000	8540000	2710000	3310000	14400000	8340000	6180000	7110000	16200000	9810000	8340000	9500000	9780000	8500000	10200000	9110000	9380000	9150000	9630000	9890000	9480000	9280000	9420000	9440000	9200000	9810000	9520000	9790000	8360000	8580000	7910000	9260000	8560000	9300000	8810000	11100000	10300000	7400000	10800000	7220000	11900000	11700000	7380000	10100000
P29508	P29508	SPB3_HUMAN	SERPINB3	Serpin B3	7150000	7480000	10000000	7460000	9580000	7690000	8310000	8740000	8090000	5110000	7310000	7760000	6210000	4110000	6410000	5290000		8100000	3800000	5330000	10700000	3540000	4070000	5060000	6810000	7450000	3590000	4130000	4440000		22700000	5130000	5320000	4960000	5170000	11100000	4950000	7300000	5320000	7260000	7180000	5220000	7040000	4940000	8190000
P29622	P29622	KAIN_HUMAN	SERPINA4	Kallistatin	8610000	7790000	9860000	9350000	10400000	8140000	9640000	10500000	9030000	8110000	7190000	6470000	8420000	8740000	8700000	8900000	8910000	9990000	9680000	9820000	10300000	9070000	10000000	8890000	9260000	9400000	9330000	9420000	9010000	9250000	9920000	9660000	8680000	8040000	8760000	7160000	7460000	9020000	7510000	8460000	8520000	7370000	8430000	9040000	8420000
P30041	P30041	PRDX6_HUMAN	PRDX6	Peroxiredoxin-6								293897											240393	276848			155256			218876	244422				179189	238269					217484				157964	150076			225862
P30043	P30043	BLVRB_HUMAN	BLVRB	Flavin reductase (NADPH)							965458				1150000			4130000	3980000	4510000	3800000		4100000			4340000					1920000				1700000	1920000			1880000		2500000	2920000		2640000	2400000
P30044	P30044	PRDX5_HUMAN	PRDX5	Peroxiredoxin-5, mitochondrial	233633	227625	363985	227304	296163	221992	208076	241783	224181	1270000	209263	173636	287236	273074	298776	241694	335202	353946	237248	283827	378041	269757	294490	239063	305276	250557	280397	291565	250689	224941	211498	247295	243816	181716	261831	254956	246951	349200	333232	222068	314837	300402	313854	335494	276544
P30086	P30086	PEBP1_HUMAN	PEBP1	Phosphatidylethanolamine-binding protein 1	8870000	8550000	3850000	7980000	4350000	2340000	2160000	8780000	1940000	8180000	10100000	8990000	6400000	9570000	9180000	10000000	6210000	11600000	12500000	8950000	8990000	10000000	9560000	10200000	11900000	10100000	10500000	12100000	10300000	11700000	9430000	8420000	9870000	9810000	11200000	8730000	11000000	10600000	9880000	11200000	10100000	10700000	9640000	9830000	11200000
P30101	P30101	PDIA3_HUMAN	PDIA3	Protein disulfide-isomerase A3	21600000	33200000	27700000	24000000	25200000	22900000	23600000	21300000	27100000	24400000	23900000	23000000	18900000	19000000	20100000	17000000	17700000	19000000	17600000	17100000	14300000	17600000	16700000	17100000	17800000	16100000	16200000	19400000	20300000	18700000	17400000	17600000	16900000	19100000	19900000	15800000	17600000	17700000	15000000	19900000	16800000	19400000	18200000	16800000	24300000
P30740	P30740	ILEU_HUMAN	SERPINB1	Leukocyte elastase inhibitor	1990000	1910000	2410000	2010000	2390000	2040000	2040000	2320000	2030000	1760000	2580000	2390000	2220000	2830000	2200000	2050000	2140000	1700000	2220000	1960000	2070000	1960000	1660000	1630000	1290000	1880000	2000000	2400000	2110000	1410000	1980000	2120000	1730000	1560000	1700000	1720000	2530000	1890000	1770000	1260000	2000000	2130000	2400000	1990000	2270000
P31025	P31025	LCN1_HUMAN	LCN1	Lipocalin-1	70900000	75300000	71200000	19900000	71800000	74900000	80500000	61200000	42500000	83800000	70600000	53400000	90400000	76400000	89800000	71600000	77000000	77000000	93300000	84200000	70500000	77000000	73500000	20800000	93400000	86000000	83700000	85900000	67800000	83200000	78000000	121000000	78400000	80100000	88400000	85900000	79100000	77500000	61100000	60100000	59300000	71900000	88000000	84400000	54200000
P31146	P31146	COR1A_HUMAN	CORO1A	Coronin-1A		2240000	2030000		2190000	1920000	1650000	1390000	1550000	1390000	1380000	1330000	1230000	1770000	1410000	1750000	1970000	1330000	1280000	1330000	1190000	1150000	1200000	1290000	1530000	1300000	1760000	1580000	1750000	1360000	1710000	1810000	1720000	1890000	1570000	1980000	1790000	1520000	1920000	1970000	1630000	1850000	1650000	1930000	1660000
P31151	P31151;Q86SG5	S10A7_HUMAN	S100A7	Protein S100-A7		7360000	12600000	11400000	8510000	13800000	6510000	1480000	6690000	6120000		6050000	6210000	4120000	4240000	10300000		10000000	1060000	3200000	4990000		4530000	2420000	4970000	1150000		4570000	5870000	11700000	4030000	12600000	6970000	5140000		7900000	11900000								4890000
P31944	P31944	CASPE_HUMAN	CASP14	Caspase-14	22500000	14500000	17000000	19800000	21700000	16400000	17200000	13500000	21300000	21600000	41200000	36000000	19500000	25500000	29200000	39700000	26200000	30400000	22100000	26200000	26700000	35200000	27100000	33000000	14200000	16700000	24800000	18700000	26600000	14200000	24100000	28200000	25600000	29500000	17200000	25100000	42300000	18800000	34800000	22800000	25400000	30000000	34800000	21700000	28800000
P32004	P32004	L1CAM_HUMAN	L1CAM	Neural cell adhesion molecule L1	8810000	5500000	2950000	7630000	10100000	9020000	7620000	7640000	8810000	8820000	17400000	27000000	12100000	6980000	11400000	13100000	9720000	11100000	9630000	8880000	8380000	9370000	10800000	10700000	10000000	6600000	10400000	9740000	11800000	7030000	9740000	8710000	9410000	12100000	10500000	10800000	14900000	9230000	7720000	10800000	12300000	14100000	8500000	11800000	11900000
P32119	P32119	PRDX2_HUMAN	PRDX2	Peroxiredoxin-2	80800000	83800000	26900000	83000000	64500000	117000000	54700000	59900000	89100000	104000000	105000000	123000000	105000000	110000000	106000000	122000000	119000000	114000000	99000000	114000000	102000000	70500000	98000000	104000000	124000000	147000000	142000000	120000000	129000000	109000000	130000000	170000000	135000000	140000000	136000000	143000000	130000000	120000000	138000000	135000000	115000000	130000000	141000000	129000000	125000000
P32942	P32942	ICAM3_HUMAN	ICAM3	Intercellular adhesion molecule 3	140298	264812	613834	449575	484020	482941	456280	374557	478603	536619	131194		217709	178018	172040	176401	211648	184707	155117	170600	110007	173483	124450	169445	268223	202820	162575	290501	268115	245464	235336	278433	241906	293435	282542	247485	170398	232940	271765	320689	211204	249232	345526	279012	561220
P33151	P33151	CADH5_HUMAN	CDH5	Cadherin-5	11700000	12200000	17500000	15100000	28500000	12900000	9920000	13100000	11000000	10700000	9770000	10800000	12500000	11500000	12500000	11900000	10900000	11000000	11100000	11900000	11300000	10700000	12900000	10500000	10800000	10600000	12300000	11600000	11300000	11700000	11000000	9690000	10800000	9910000	10800000	11200000	12100000	11400000	12900000	12400000	11800000	11800000	11700000	11300000	9490000
P33908	P33908	MA1A1_HUMAN	MAN1A1	Mannosyl-oligosaccharide 1,2-alpha-mannosidase IA	6150000	6590000	9850000	6660000	8610000	5500000	4640000	4990000	3740000	5250000	5590000	5820000	4300000	4440000	4280000	4310000	4970000	5560000	4150000	4410000	4250000	3900000	4430000	4060000	4210000	4400000	4750000	5140000	5240000	4140000	5620000	4610000	4220000	4340000	4310000	4590000	4310000	4120000	5150000	4880000	4490000	4990000	4440000	4580000	5410000
P34096	P34096	RNAS4_HUMAN	RNASE4	Ribonuclease 4	1110000	1770000	1790000	721916	906263	1360000	1310000	875133	914724	1080000		712211	1080000	978110	1080000	1050000	1030000	1130000	1070000	698296	1060000	1290000	967119	986447	1040000	1030000	1090000	1090000	1110000	953072	1110000	1060000	929281	1040000	1030000	730993	908012	881573	1030000	964629	1200000	977829	1220000	996884	1240000
P35030	P35030	TRY3_HUMAN	PRSS3	Trypsin-3	897689	1190000	1030000	844961	1000000	827095	793590	726483	908588	899536	929425	834536	333722	332664	470933	354513	342349	396111	359095	361484	341247	357370	360844	340805	697627	631527	679641	625704	711741	663326	594219	644202	638137	619966	562793	483067	772120	801352	837400	747478	801639	879030	741123	755443	915873
P35443	P35443	TSP4_HUMAN	THBS4	Thrombospondin-4	5700000	6770000	1350000	5820000	4600000	6210000	2620000	4260000	4760000	5270000	5520000	5020000	5270000	5340000	5780000	4930000	4650000	4870000	4890000	5160000	5010000	5070000	5030000	4820000	5340000	4490000	4630000	5240000	5590000	5630000	4910000	4860000	4330000	4180000	5910000	3860000	4510000	4260000	3920000	4450000	5020000	3860000	5000000	4640000	5210000
P35527	P35527	K1C9_HUMAN	KRT9	Keratin, type I cytoskeletal 9	124000000	136000000	140000000	113000000	142000000	114000000	116000000	106000000	112000000	105000000	124000000	119000000	90500000	93700000	97000000	102000000	96600000	106000000	92200000	91700000	91500000	102000000	91000000	86500000	90000000	93700000	86100000	88400000	90100000	86900000	92700000	92300000	100000000	94100000	92000000	93000000	93500000	104000000	88800000	98200000	103000000	112000000	102000000	94500000	96400000
P35542	P35542	SAA4_HUMAN	SAA4	Serum amyloid A-4 protein	40200000	44100000	57000000	50500000	66700000	55900000	47600000	38300000	46800000	42300000	35700000	33300000	16600000	17700000	19100000	17800000	20700000	19900000	20000000	17400000	16300000	18300000	17700000	16000000	31200000	22900000	28100000	26700000	32700000	29200000	28700000	28400000	25700000	28900000	29300000	24900000	22100000	27000000	23500000	32900000	32500000	38600000	29900000	33900000	40600000
P35555	P35555	FBN1_HUMAN	FBN1	Fibrillin-1	5270000	6990000	6080000	6150000	8300000	4140000	5040000	3990000	4780000	4000000	5800000	3000000	5660000	5190000	4530000	4580000	5380000	5030000	5130000	412271	3850000	4470000	3970000	4490000	4660000	3320000	3610000	3940000	4010000	4170000	3730000	4100000	4100000	4230000	3820000	3550000	3300000	3300000	3300000	3690000	3410000	3630000	3260000	3870000	5640000
P35579	P35579	MYH9_HUMAN	MYH9	Myosin-9	45300000	61900000	62200000	56800000	62300000	60600000	48900000	43500000	55300000	56000000	58800000	49900000	40200000	44700000	41000000	44800000	47800000	47800000	41700000	40700000	40800000	44600000	40600000	42900000	43500000	38400000	42500000	42600000	47700000	41100000	43400000	44300000	42000000	45100000	41400000	41600000	43400000	40100000	41800000	44700000	43400000	48500000	44800000	44300000	52100000
P35590	P35590	TIE1_HUMAN	TIE1	Tyrosine-protein kinase receptor Tie-1	8530000	13000000	17700000	5500000	5030000	4400000	4730000	7650000	3470000	14200000	3640000	4680000	2980000	2670000	2440000	2490000	3120000	1330000	2120000	2510000	1590000	1560000	2930000	1890000	1280000	1240000	3300000	3630000		2410000	2830000	7170000	7130000	2180000	2310000	4270000	2710000	1290000	3680000	3040000		3180000	2310000	1460000	3490000
P35858	P35858	ALS_HUMAN	IGFALS	Insulin-like growth factor-binding protein complex acid labile subunit	2330000	2520000	3300000	2550000	3290000	2820000	2620000	3100000	2620000	1940000	1910000	1900000	1970000	2120000	2140000	2260000	2250000	2540000	2620000	2320000	2310000	2290000	2510000	2040000	1840000	2130000	1950000	1910000	1930000	1950000	1840000	2230000	1910000	1740000	1950000	1750000	2090000	2590000	2310000	2410000	2400000	2470000	2540000	2730000	2380000
P35908	P35908	K22E_HUMAN	KRT2	Keratin, type II cytoskeletal 2 epidermal	139000000	128000000	121000000	147000000	171000000	144000000	142000000	154000000	158000000	93900000	107000000	133000000	154000000	166000000	165000000	220000000	152000000	161000000	160000000	177000000	259000000	181000000	174000000	149000000	153000000	165000000	159000000	157000000	153000000	175000000	154000000	196000000	156000000	153000000	162000000	155000000	145000000	164000000	150000000	158000000	162000000	153000000	168000000	150000000	145000000
P35916	P35916	VGFR3_HUMAN	FLT4	Vascular endothelial growth factor receptor 3	16300000	15400000	22400000	12800000	31300000	31100000	16600000	32000000	26900000	18900000	27500000	30200000	35500000	40200000	39200000	43100000	40500000	38800000	40000000	37500000	40600000	42100000	41100000	35200000	33600000	36000000	35700000	38300000	39700000	34900000	37800000	34700000	37600000	26000000	36700000	36700000	34000000	34000000	31200000	32800000	31900000	29900000	30800000	32800000	20600000
P36222	P36222	CH3L1_HUMAN	CHI3L1	Chitinase-3-like protein 1	3740000	4020000	5380000	3920000	9010000	3620000	4060000	5010000	4690000	3750000	6990000	6900000	7100000	4660000	6910000	6220000	7600000	7690000	4670000	4280000	7240000	6530000	7210000	5900000	4050000	5310000	5520000	6380000	6890000	5260000	5420000	5680000	6020000	5590000	5800000	5150000	7130000	6270000	6870000	6820000	7190000	7540000	7420000	7530000	7550000
P36871	P36871	PGM1_HUMAN	PGM1	Phosphoglucomutase-1	83568.8	25129.8		8821.95	10053.3				94057.9	128277	113422	86169.5	47078.3	61151.3		61562.3	41875.7		35205	31205.5	38417.5	47136.5	34527	6476.1	94478.6	100417			36524.7	103823		194899		116077	81515.5	115670	93709.2	125970	148665	146163	147269	131372	70743		28174
P36955	P36955	PEDF_HUMAN	SERPINF1	Pigment epithelium-derived factor	14700000	15000000	18300000	14300000	18200000	15100000	14200000	14800000	14900000	14000000	14700000	13300000	13500000	13800000	12900000	13900000	13700000	15100000	14000000	13700000	13700000	14100000	14100000	13200000	19000000	19600000	20500000	19500000	21500000	20100000	20100000	20800000	20400000	19100000	18800000	17400000	18600000	19100000	19700000	17400000	17900000	17300000	18500000	18900000	18500000
P36980	P36980	FHR2_HUMAN	CFHR2	Complement factor H-related protein 2	7080000	7460000	8740000	8200000	9930000	8110000	6450000	6370000	8570000	8020000	7850000	7030000	17900000	17800000	18400000	18300000	18000000	19600000	18700000	17300000	16500000	17200000	17500000	16700000	20200000	17500000	20600000	22500000	23100000	18900000	20600000	19900000	19400000	18100000	18200000	18500000	14100000	15500000	16400000	16500000	16000000	16800000	15800000	15500000	16500000
P37802	P37802	TAGL2_HUMAN	TAGLN2	Transgelin-2	2620000	4550000	6370000	3370000	6000000	3270000	3250000	2730000	3460000	3680000	4010000	3820000	2940000	2620000	2760000	2870000	2990000	3220000	2930000	2890000	2540000	2520000	2840000	2540000	3200000	2870000	2810000	3010000	3600000	2850000	2660000	2830000	2830000	3180000	2840000	2820000	2560000	2680000	3060000	3080000	2890000	3100000	2470000	2960000	3310000
P37837	P37837	TALDO_HUMAN	TALDO1	Transaldolase	30300000	29500000	14400000	34000000	18200000	29500000	14100000	12900000	32500000	38300000	40400000	35200000		39500000	7450000	12700000	30100000	36200000	21700000	15200000	7140000	2950000	17800000	12800000	6200000	21100000	21300000	19900000	17000000	23100000	22400000	34100000		4820000		18300000	36200000	31500000	26700000	26000000	28200000	20500000	29100000	29900000	31100000
P39060	P39060	COIA1_HUMAN	COL18A1	Collagen alpha-1(XVIII) chain	5750000	9700000	8880000	6430000	20300000	11600000	19300000	12900000	10800000	12700000	11100000	10100000	8080000	8810000	8610000	8640000	8460000	7140000	7270000	7930000	8470000	9850000	8280000	9580000	9850000	9510000	9830000	10300000	11900000	9050000	11000000	9740000	10700000	8750000	7790000	9780000	10900000	9480000	13800000	9530000	9800000	12100000	11500000	9080000	11700000
P40189	P40189	IL6RB_HUMAN	IL6ST	Interleukin-6 receptor subunit beta	5690000	14600000	3960000	7880000	15500000	13500000	8750000	6250000	7920000	4710000	5290000	5670000	6100000	6520000	6180000	6210000	6990000	6970000	6080000	6910000	7090000	6290000	6380000	5970000	7800000	7920000	7110000	7000000	7540000	7870000	8550000	8090000	8360000	7940000	5110000	8690000	6740000	8030000	7690000	8500000	8520000	7950000	8390000	8690000	7520000
P40197	P40197	GPV_HUMAN	GP5	Platelet glycoprotein V	46000000	44700000	20300000	128000000	12800000	62900000	115000000	42900000	112000000	120000000	96600000	49400000	38200000	39000000	99100000	35700000	44300000	38400000	37100000	80400000	36200000	41100000	77100000	55000000	28900000	32400000	25300000	21500000	46900000	24100000	30600000	27800000	45800000	24900000	25000000	34600000	80300000	75400000	37400000	38400000	51300000	50300000	109000000	48600000	71800000
P40925	P40925	MDHC_HUMAN	MDH1	Malate dehydrogenase, cytoplasmic	41700000	44300000	71400000	31400000	20100000	35600000	35700000	22300000	38600000	38200000	26600000	24000000	25700000	20800000	25100000	25900000	27200000	29200000	25800000	25000000	24000000	26000000	24600000	24800000	28500000	24000000	25600000	26600000	28100000	27800000	24100000	27000000	24200000	25800000	25900000	21900000	22400000	22400000	23900000	24300000	24600000	26200000	22300000	24400000	27900000
P41222	P41222	PTGDS_HUMAN	PTGDS	Prostaglandin-H2 D-isomerase	109498	175920	224189	171495	200461	174503	206512	307798	258120	192464	168415	171828	180218	206232	205489	239135	201616	262104	213436	237062	227503	223693	226268	182568	257826	355737	309686	282544	310122	290190	342920	327992	287953	210252	247687	199403	239383	269532	328482	257876	244303	233857	285691	236321	252618
P43121	P43121	MUC18_HUMAN	MCAM	Cell surface glycoprotein MUC18	5270000	2880000	6690000	5920000	4000000	4660000	5120000	5630000	6190000	5260000	5610000	5050000	5600000	5030000	5100000	5060000	4850000	6230000	5540000	5470000	5860000	6170000	5780000	5390000	4870000	4960000	4950000	5000000	5580000	4530000	4700000	5010000	4610000	4240000	4980000	4830000	5120000	5030000	4370000	4330000	4110000	5070000	5170000	4300000	5720000
P43251	P43251	BTD_HUMAN	BTD	Biotinidase	10400000	11100000	14300000	12100000	15000000	12800000	10800000	12000000	11400000	6720000	6150000	5910000	9330000	8330000	7840000	7670000	7160000	8160000	8280000	9150000	6950000	7750000	7860000	7050000	8740000	7980000	8080000	7830000	8280000	8200000	7490000	7630000	7390000	7650000	7980000	6560000	7680000	7180000	6830000	8170000	7570000	7820000	7800000	8580000	8720000
P43652	P43652	AFAM_HUMAN	AFM	Afamin	136000000	120000000	177000000	135000000	178000000	135000000	126000000	121000000	124000000	117000000	112000000	104000000	91900000	91300000	92700000	93800000	94000000	105000000	97300000	99800000	101000000	98700000	101000000	88400000	106000000	97300000	102000000	104000000	111000000	99600000	99800000	102000000	98100000	89200000	92600000	82000000	89100000	106000000	114000000	115000000	120000000	112000000	101000000	120000000	113000000
P48637	P48637	GSHB_HUMAN	GSS	Glutathione synthetase	67300000	79000000	85000000	73700000	83000000	70300000	59200000	45900000	66100000	73100000	69900000	49400000	72100000	69600000	85600000	94600000	96000000	95600000	88200000	65800000	66700000	79700000	57600000	82500000	57300000	43500000	58300000	65600000	66300000	66300000	60300000	62200000	57400000	74700000	62500000	61400000	62900000	59400000	54600000	60900000	55200000	76600000	71200000	71300000	96900000
P48740	P48740	MASP1_HUMAN	MASP1	Mannan-binding lectin serine protease 1	12000000	11800000	18800000	16000000	18300000	15200000	13300000	14900000	12400000	10600000	14200000	11700000	13700000	13300000	13800000	13900000	14200000	15200000	16200000	15500000	14900000	14600000	14500000	12400000	10600000	10000000	11300000	10400000	11400000	11000000	11500000	11800000	11100000	9280000	10400000	9380000	12200000	12600000	13200000	12800000	12000000	12800000	13400000	13500000	13500000
P49747	P49747	COMP_HUMAN	COMP	Cartilage oligomeric matrix protein	32200000	57300000	50300000	49000000	52700000	39900000	38700000	40000000	54700000	58600000	45500000	52800000	32800000	42700000	43900000	49400000	50700000	51200000	39400000	40600000	38300000	45400000	42100000	38000000	48000000	50400000	52100000	46300000	48200000	46000000	48500000	41600000	44500000	44600000	46700000	37700000	52800000	47600000	52500000	48100000	45700000	46900000	43600000	43300000	57400000
P49908	P49908	SEPP1_HUMAN	SELENOP	Selenoprotein P	12400000	14800000	13800000	12800000	11600000	12000000	10600000	9490000	12200000	8040000	10400000	8430000	10800000	9830000	9130000	9290000	9190000	10200000	9730000	9380000	8740000	8990000	9160000	8820000	11000000	8620000	9730000	10100000	10200000	9950000	9540000	10400000	9570000	9710000	9940000	8550000	9130000	9100000	8990000	9300000	9350000	8700000	9220000	9740000	11700000
P50395	P31150;P50395	GDIB_HUMAN	GDI2	Rab GDP dissociation inhibitor beta	4490000	6640000	9570000	7610000	10200000	7240000	4480000	4500000	4480000	3840000	3090000	2380000	4330000	6700000	4590000	4090000	3370000	3880000	4280000	12400000	4460000	7130000	4590000	3530000	3760000	3940000	3830000	4520000	3750000	3460000	4180000	4010000	4480000	2630000	4080000	6140000	5130000	3730000	3840000	3780000	3450000	3780000	4140000	4330000	3790000
P50552	P50552	VASP_HUMAN	VASP	Vasodilator-stimulated phosphoprotein	1690000	1310000	2440000	1160000	1660000	1800000	1630000	1470000	1840000	1720000	2940000	1550000	1430000	2190000	1500000	1200000	1170000	2040000	2840000	2400000	996420	887326	1350000	1550000	1740000	1290000	1760000	2690000	1440000	2050000	1830000	2270000	2170000	1460000	1610000	1220000	420092	2380000	2730000	1310000	1120000	2570000	1790000	2540000	3430000
P51884	P51884	LUM_HUMAN	LUM	Lumican	257000000	273000000	302000000	255000000	314000000	246000000	234000000	239000000	239000000	228000000	229000000	209000000	176000000	205000000	191000000	208000000	198000000	202000000	203000000	185000000	187000000	190000000	186000000	170000000	229000000	195000000	224000000	224000000	243000000	218000000	247000000	212000000	202000000	193000000	194000000	188000000	212000000	190000000	217000000	214000000	214000000	210000000	208000000	221000000	223000000
P52209	P52209	6PGD_HUMAN	PGD	6-phosphogluconate dehydrogenase, decarboxylating	4080000	3890000	4580000	3740000	4860000	2970000	3270000	3010000	2480000	3510000	3420000	4000000	2040000	2190000	2250000	2590000	2220000	2260000	1700000	1980000		11400000	2150000	2270000	2020000	1980000	1960000	2040000	2140000	1410000	2040000	2270000	1890000	2910000	1600000	2480000	2510000		1740000	1430000	1350000	1790000	1550000	1360000	1280000
P52565	P52565	GDIR1_HUMAN	ARHGDIA	Rho GDP-dissociation inhibitor 1	9340000		2610000		13800000	1670000	1670000	6710000	1900000	2430000	5800000	3060000	2500000	2100000	2500000	2220000	2550000	2330000	2330000	2300000	2200000	2300000	2170000	2190000	2110000	2180000	2250000	2250000	2320000	1890000	2020000	2640000	2680000	2500000	2440000	2670000	2770000	2570000	2880000	2580000	2740000	2720000	2340000	2640000	2450000
P52566	P52566	GDIR2_HUMAN	ARHGDIB	Rho GDP-dissociation inhibitor 2	3320000	4250000	2000000	3570000	3230000	4470000	3540000	3020000	3710000	5260000	5520000	4140000	4750000	3970000	3490000	4050000	3980000	3740000	3840000	3370000	3460000	3890000	3560000	3440000	4040000	2620000	3340000	3670000	4540000	3140000	3490000	3250000	3410000	3460000	2940000	3200000	3620000	3560000	4980000	4350000	3910000	4020000	3660000	4620000	5160000
P52907	P52907	CAZA1_HUMAN	CAPZA1	F-actin-capping protein subunit alpha-1	500217	543224	811121	603932	789679	601335	633334	480882	636496	551361	287896	492614	416695	575719	602770	687103	665290	691230	633584	667028	639809	649512	688503	404141	475716	596269	464452	692090	810847	476354	430931	740471	420969	428997	430961	445215	578510	646837	690895	662028	791984	735034	570765	750402	720516
P54108	P54108	CRIS3_HUMAN	CRISP3	Cysteine-rich secretory protein 3		29294.1	29023.1	16265.4	24733.1	26931.1	12316.6	18739.6	20938.5	30994	23400.2	22203	49453.7	34813.3	40637.9	31685.4	39740.6	32143	36124.8	32283.3	30235.5	33818.6	37041.3	40885.7	55823.2	33723.3	47411	47015.5	43423.4	45720.9	47966.4	45559.1	39830	42550.3	32664.6	32629.7	34522.5	22709	36724.8	32917.3	27753.8	36945.4	34275.1	36734.4	48326
P54289	P54289	CA2D1_HUMAN	CACNA2D1	Voltage-dependent calcium channel subunit alpha-2/delta-1	2780000	4280000	1750000	2900000	2020000	2690000	3020000	2970000	2670000	3130000	3480000	2640000	3010000	2930000	2950000	2960000	3050000	3150000	2910000	2840000	3090000	3190000	3410000	2900000	2750000	3040000	3130000	3320000	2930000	2830000	2870000	3050000	3200000	2710000	3420000	2660000	3400000	3330000	3410000	3460000	3120000	3480000	3370000	3450000	3150000
P54802	P54802	ANAG_HUMAN	NAGLU	Alpha-N-acetylglucosaminidase	6450000	2740000	5850000	6360000	2530000	2560000	6690000	6130000	5090000	5810000	5530000	6050000	4060000	3980000	4760000	5010000	4470000	5090000	4030000	3900000	4950000	5250000	4530000	5600000	3700000	4300000	4960000	4550000	4970000	3280000	4550000	4100000	5310000	4390000	4450000	4580000	4560000	5760000	6160000	5200000	5240000	5230000	5070000	5650000	5070000
P55056	P55056	APOC4_HUMAN	APOC4	Apolipoprotein C-IV	5390000	1670000	7150000	3350000	2350000	5350000	4880000	1810000	1710000	3810000	1670000	2440000	1090000	10200000	6760000	6930000	8790000	10500000	7760000	10300000	10400000	10100000	10400000	9790000	9960000	10400000	7130000	7650000	6390000	9560000	9370000	10400000	9410000	8350000	10100000	9970000	5050000	11400000	6290000	10700000	8690000	10300000	11000000	11400000	15300000
P55058	P55058	PLTP_HUMAN	PLTP	Phospholipid transfer protein	67000000	67400000	105000000	78900000	77200000	66900000	69900000	66300000	71400000	64700000	47200000	42600000	64700000	52600000	59800000	49200000	57800000	55500000	64900000	65200000	58300000	54600000	57500000	51700000	69700000	60700000	65800000	61300000	54000000	60900000	58800000	61700000	53900000	51700000	59000000	53500000	56500000	57300000	55200000	59700000	61700000	57200000	57400000	60700000	60900000
P55072	P55072	TERA_HUMAN	VCP	Transitional endoplasmic reticulum ATPase	9010000	10100000	11200000	11700000	13800000	8890000	9790000	6830000	7900000	7650000	7400000	8770000	6530000	7370000	10000000	7710000	9140000	8450000	10300000	8830000	8990000	10100000	8300000	8760000	7460000	7720000	8630000	5950000	7510000	8410000	8250000	8200000	7550000	7960000	7160000	9540000	10200000	10500000	8240000	7930000	8000000	8370000	8710000	8610000	8780000
P55103	P55103	INHBC_HUMAN	INHBC	Inhibin beta C chain	43319.5	39424.6	65903.1	56155.5	71702.1	64958.9	54775.6	50308.2	48086					37254.8	37882.9			25124.3	31270.7	41470.8	27335.7	21479.5	32721.3		67655.7	31192.1	67966	65893.2	37322.4	64618.9	57092.7	45012.9	17320.6	15047.4	29890.6	18971.2	38677	63283.9	17022.8	36047.5	37668.3	33933.4	15112.7	55925.5	43094.6
P55209;Q99733	P55209;Q99733	NP1L1_HUMAN;NP1L4_HUMAN	NAP1L1;NAP1L4	Nucleosome assembly protein 1-like 1	22600000	31300000	33200000	37200000	37800000	39500000	25500000	16300000	23000000	9090000	5220000	6920000	22500000	20000000	19000000	14000000	20800000	19100000	22500000	16800000	11200000	12300000	11900000	11600000	16100000	9450000	10600000	15100000	12100000	12500000	12400000	13900000	10600000	11000000	11600000	10300000	9540000	10600000	9440000	12000000	12800000	14100000	10600000	14400000	23100000
P55285	P55285	CADH6_HUMAN	CDH6	Cadherin-6	18600000	18800000	22800000	16500000	6250000	15700000	17400000	15900000	15900000	15700000	13000000	15100000	9030000	8540000	9590000	9220000	9190000	9120000	8620000	9810000	9700000	10000000	9610000	9340000	11200000	11100000	10600000	11400000	10600000	10400000	10100000	12100000	11800000	10700000	11600000	12000000	10400000	9620000	9690000	10800000	10300000	9590000	9270000	9050000	10200000
P55290	P55290	CAD13_HUMAN	CDH13	Cadherin-13	22800000	23000000	28100000	20300000	26200000	20900000	45700000	44600000	20100000	32400000	37100000	22200000	48900000	44100000	50900000	43200000	49300000	52500000	49800000	45400000	45000000	21400000	52300000	43500000	50300000	47700000	51900000	52300000	46600000	57200000	52600000	51300000	52900000	45200000	50500000	46900000	50000000	61100000	60400000	60500000	58700000	68900000	62400000	69200000	61500000
P55854;P61956;Q6EEV6	P55854;P61956;Q6EEV6	SUMO2_HUMAN;SUMO3_HUMAN;SUMO4_HUMAN	SUMO2;SUMO3;SUMO4	Small ubiquitin-related modifier 3	2450000	3000000	3410000	1930000	3540000	2170000	2340000	1180000	2820000	2930000	3170000	3320000	2700000	2580000	2590000	2430000	2870000	2640000	2340000	2690000	2050000	2260000	2130000	2450000	2940000	2060000	2610000	2910000	3070000	2440000	2640000	2640000	2550000	2690000	2740000	2740000	2380000	2240000	2510000	3280000	2710000	3240000	2360000	2840000	4190000
P58546	P58546	MTPN_HUMAN	MTPN	Myotrophin	14500000						15700000	217472			220646					2120000	1660000		1810000						2330000	2670000			2180000			13100000	22100000			10700000	2580000	1630000					20200000		211298
P59665;P59666	P59665;P59666	DEF1_HUMAN;DEF3_HUMAN	DEFA1;DEFA3	Neutrophil defensin 1	627535	769001		758965	865977	735638	662057		724880	838080	642757		466984	397834	409215	435861	457344	469300	417226	360823	393354	390569	386862	408254	615279	437680	446866	480219		437715	438459		438421	561208	455994	342674		394100	380921	470919	417658	423517	370841	450332	715270
P59998	P59998	ARPC4_HUMAN	ARPC4	Actin-related protein 2/3 complex subunit 4	5650000	5260000	6910000	6650000	8180000	5510000	6200000	6010000	6360000	5900000	3030000	2690000	6410000	6890000	6630000	6800000	6460000	6690000	7380000	8360000	7760000	7050000	7820000	7460000	7110000	7860000	7130000	6930000	5970000	7840000	7000000	7090000	6380000	7220000	8110000	6040000	5620000	6660000	5200000	6630000	5460000	6030000	6650000	6910000	5230000
P60174	P60174	TPIS_HUMAN	TPI1	Triosephosphate isomerase	199000000	213000000	44900000	211000000	95100000	221000000	180000000	192000000	190000000	208000000	225000000	214000000	182000000	174000000	168000000	178000000	176000000	151000000	184000000	180000000	163000000	205000000	178000000	161000000	169000000	165000000	190000000	196000000	198000000	160000000	167000000	184000000	188000000	175000000	165000000	189000000	182000000	179000000	168000000	214000000	199000000	216000000	205000000	200000000	193000000
P60660	P14649;P60660	MYL6_HUMAN	MYL6	Myosin light polypeptide 6	265000000		1380000	207000000		198000000	212000000	189000000	192000000	218000000		194000000		1240000	188000000	1100000	1330000		978513		949821	160000000	153000000	920777	934262		171000000	914712	965575	175000000	165000000	1020000	911865		177000000	206000000		1090000	205000000		1300000	1190000	201000000	1160000	1520000
P60709	P60709;P63261	ACTB_HUMAN	ACTB	Actin, cytoplasmic 1	24000000	33200000	48200000	30800000	30800000	54800000	32000000	47900000	33600000	31500000	34900000	20000000	25100000	34800000	27300000	15100000	22100000	33800000	37500000	44800000	24600000	24600000	25300000	22900000	26900000	25100000	27100000	24100000	23600000	25900000	22400000	37700000	21600000	21500000	24000000	21800000	33700000	28900000	24000000	23500000	50900000	53800000	23900000	31900000	117000000
P61158	P61158	ARP3_HUMAN	ACTR3	Actin-related protein 3	2270000	3180000	2290000	3240000	2950000	2510000	2070000	2630000	2120000	2640000	2220000	7340000	2400000	2490000	2680000	2150000	3070000	3430000	2460000	2490000	2820000	2610000	2130000	2370000	2760000	1870000	2150000	2800000	3110000	2320000	2130000	2770000	2080000	1910000	2080000	1980000	2260000	2250000	2050000	2270000	2210000	2550000	2610000	3200000	3120000
P61160	P61160	ARP2_HUMAN	ACTR2	Actin-related protein 2		1740000	3190000	1840000	2150000	4870000	2270000	3400000	2590000	3030000	2770000	3100000	1360000	1270000	1410000	1330000	1260000	1370000	1340000	1140000	1510000	1520000	1450000	1470000	1780000	1670000	1710000	1770000	2180000	1340000	1290000	1570000	1680000	1970000	1490000	1650000	1490000	1900000	1620000	1780000	1670000	1740000	1570000	1470000	1390000
P61224	P61224;P62834	RAP1B_HUMAN	RAP1B	Ras-related protein Rap-1b	4990000	6130000	7000000	4890000	4350000	7500000	4710000	7760000	4800000	4570000	5590000	1930000	2990000	3430000	8760000	2770000	4570000	3440000	6200000	4070000	2980000	3380000	5100000	2500000	2930000	2170000	2920000	2780000	2870000	2280000	5090000	3850000	2980000	6430000	2320000	2800000	3890000	3560000	11700000	2750000	4500000	6160000	4480000	3470000	6710000
P61626	P61626	LYSC_HUMAN	LYZ	Lysozyme C	44100000	58700000	72400000	60400000	43600000	60100000	55100000	56500000	52500000	54000000	55100000	45900000	52300000	38600000	37800000	40200000	37200000	40100000	40200000	36300000	37600000	39900000	40100000	37300000	37600000	34700000	39800000	37800000	41700000	37300000	35900000	36100000	38900000	36700000	37200000	27800000	40300000	39600000	43100000	47800000	47600000	50300000	44200000	38700000	45800000
P61769	P61769	B2MG_HUMAN	B2M	Beta-2-microglobulin	1310000	2960000	2580000	2270000	1920000	2440000	1470000	1720000	1810000	1900000	1600000	1810000	1250000	1390000	1100000	1270000	1390000	1470000	1490000	1240000	1250000	1230000	1230000	1380000	1310000	1350000	1150000	1370000	1480000	1390000	1380000	1520000	1250000	1400000	1480000	1270000	1050000	1160000	1240000	1230000	1430000	1370000	1330000	1360000	1700000
P61916	P61916	NPC2_HUMAN	NPC2	NPC intracellular cholesterol transporter 2	1900000	2920000	4150000	2320000	3640000	2850000	2540000	2160000	2500000	2620000	2620000	2560000	2290000	1940000	1820000	1750000	1840000	1850000	1840000	1750000	1690000	1870000	1930000	2030000	1770000	1460000	1640000	1720000	1910000	1750000	1690000	2020000	1730000	1850000	1690000	1460000	1390000	1490000	1620000	1820000	1680000	2200000	798234	1630000	2610000
P62258	P27348;P31946;P31947;P61981;P62258;P63104;Q04917	1433E_HUMAN	YWHAE	14-3-3 protein epsilon	2150000	2460000	3170000	2270000	3300000	3070000	2870000	2650000	3840000	4580000	5730000	5570000	2850000	4190000	4250000	5020000	4610000	4470000	2990000	3450000	4000000	4870000	3710000	3540000	2980000	3010000	3980000	4040000	4330000	2800000	3510000	3430000	4300000	3600000	3360000	4120000	3540000	3510000	4500000	3870000	4220000	4600000	3520000	3690000	4400000
P62328	P62328	TYB4_HUMAN	TMSB4X	Thymosin beta-4	1210000	1500000	1650000	1060000	993339	1810000	1280000	1440000	1350000	1340000	1960000	1080000	1320000	1610000				1230000	1420000	1600000	998579	1070000	1040000	1000000	1230000	722186	1070000	1080000	1220000	976481		1170000	963370	928401	1050000		1470000	1200000		1280000	1350000	2220000		1420000	2940000
P62937	P62937	PPIA_HUMAN	PPIA	Peptidyl-prolyl cis-trans isomerase A	3300000	3480000	5710000	4760000	6870000	7350000	4490000	11400000	5980000	5130000	6190000	2980000	2580000	4020000	1240000	1480000	2060000	3780000	5180000	6280000	2610000	3590000	3270000	2290000	3200000	1700000	3580000	2230000	3500000	2050000	2280000	3810000	2690000	2960000	3240000	2360000	6240000	3800000	3030000	4140000	5720000	7600000	3590000	4200000	8970000
P63104	P63104	1433Z_HUMAN	YWHAZ	14-3-3 protein zeta/delta			4610000	3110000		3310000	3740000	3520000	3740000	4710000	5300000	3640000	2630000	2990000	5360000	3760000	2280000	1680000	3150000	2830000	3090000	2190000	3530000	2670000	3720000	3360000	3440000	2850000	2950000	4040000	3640000	3990000	3320000		2540000	2470000	4500000	3480000	4360000	3850000	3930000	9160000	3280000	3960000	3370000
P63241	P63241;Q9GZV4;Q6IS14	IF5A1_HUMAN	EIF5A	Eukaryotic translation initiation factor 5A-1	4680000	3580000	5260000	2300000	5310000	3850000	5080000	7380000	4800000	4130000	5420000	5270000	4610000	6060000	5840000	6260000	6280000	6070000	6280000	6160000	5710000	5990000	5190000	4950000	5030000	5780000	5840000	6180000	5910000	5530000	5940000	6200000	5800000	5590000	7060000	5280000	6560000	6570000	6120000	5900000	6750000	7830000	5710000	6500000	8360000
P67936	P67936	TPM4_HUMAN	TPM4	Tropomyosin alpha-4 chain	59200000	76700000	79200000	63800000	83700000	65800000	59100000	50400000	56600000	65700000	64100000	60200000	60600000	56000000	52600000	50100000	53300000	53200000	55800000	51800000	48900000	53200000	47900000	53300000	55800000	48200000	53400000	54300000	55700000	48800000	50400000	54500000	52500000	58700000	51500000	52700000	53500000	52400000	52200000	55100000	55700000	52800000	53900000	52800000	52200000
P68871	P02042;P68871	HBB_HUMAN	HBB	Hemoglobin subunit beta	29300000	40500000	49000000	37400000	63200000	56100000	44000000	47100000	36700000	36900000	39900000	46300000	26700000	42000000	44200000	57000000	52400000	32100000	35600000	47400000	51700000	36500000	43300000	32400000	44900000	77700000	84800000	55300000	68200000	38100000	59900000	74000000	73300000	84100000	54700000	85300000	60000000	55600000	92900000	75900000	50600000	63000000	67700000	71300000	47000000
P69905	P69905	HBA_HUMAN	HBA1	Hemoglobin subunit alpha	10400000	14000000	17400000	13200000	23000000	20000000	15900000	15700000	12900000	14200000	15000000	16500000	9780000	14500000	15000000	19900000	18200000	11600000	13000000	17300000	18300000	13000000	15200000	12000000	16700000	25800000	29500000	19700000	23200000	13700000	21800000	26200000	24200000	27400000	19800000	28200000	22600000	19100000	30600000	27000000	18000000	22100000	23900000	25700000	17100000
P78417	P78417	GSTO1_HUMAN	GSTO1	Glutathione S-transferase omega-1	32600000	37000000	26100000	35800000	20200000	32300000	32000000	31900000	34300000	35700000	33500000	30000000	28500000	29100000	26600000	22000000	28600000	26500000	32400000	29000000	27100000	24000000	25700000	25600000	32700000	26400000	25200000	23100000	27800000	28600000	25900000	30300000	24700000	26800000	28900000	24500000	27300000	26800000	21000000	25800000	28400000	25500000	25400000	23900000	29200000
P78509	P78509	RELN_HUMAN	RELN	Reelin	9270000	3570000	13100000	2580000	17500000	9420000	8440000	6470000	4330000	3600000	4350000	3600000	5940000	5430000	7160000	5040000	5390000	6490000	5770000	6730000	6270000	5480000	6790000	6230000	5770000	5940000	6220000	6520000	5900000	6530000	5930000	6270000	5450000	4690000	5740000	5100000	6260000	6900000	6480000	6340000	6220000	6810000	6330000	5980000	6030000
P80108	P80108	PHLD_HUMAN	GPLD1	Phosphatidylinositol-glycan-specific phospholipase D	50500000	50900000	67500000	51400000	65600000	54100000	48400000	48600000	50500000	49700000	50000000	42800000	36800000	33100000	37200000	33600000	35000000	38500000	36500000	36300000	36700000	36900000	35900000	33000000	44000000	42700000	47200000	45200000	45900000	42900000	42300000	45700000	41800000	38800000	43400000	37300000	45100000	43700000	47800000	44000000	44500000	44200000	41600000	44000000	41300000
P80188	P80188	NGAL_HUMAN	LCN2	Neutrophil gelatinase-associated lipocalin	30800000	29400000	15700000	30800000	15600000	8210000	8930000	5540000	32100000	6350000	5630000	3950000	38500000	40200000	40500000	31900000	39400000	36700000	31300000	40500000	33700000	31500000	40500000	37000000	32900000	33100000	28500000	27600000	24600000	29500000	30100000	34800000	31700000	21200000	28000000	34700000	30000000	30400000	27500000	24000000	25500000	25400000	29900000	22400000	24200000
P80748	P80748	LV321_HUMAN	IGLV3-21	Immunoglobulin lambda variable 3-21	1570000	2030000	2260000	1620000	2060000	1560000	1480000	1740000	1810000	1330000	1150000	966481	4570000	4220000	4040000	4450000	4190000	4450000	4510000	4120000	4360000	4350000	4240000	3880000	2480000	2330000	2770000	2700000	3060000	2410000	2440000	2530000	2500000	2360000	2560000	2320000	1900000	2340000	1930000	2100000	1950000	1910000	2490000	2550000	2270000
P81605	P81605	DCD_HUMAN	DCD	Dermcidin	28800000	20100000	18400000	31500000	3150000	28400000	29500000	28900000	21700000	28700000	33100000	21600000	19200000	19900000	30900000	26200000	11200000	20200000	13500000	16600000	15900000	16000000	18100000	15600000	19700000	17700000	18500000	20900000	18000000	16800000	15500000	19300000	16500000	14600000	15800000	22500000	19600000	16200000	20900000	17300000	18500000	17200000	19100000	17900000	19000000
P84085	P18085;P84085	ARF5_HUMAN	ARF5	ADP-ribosylation factor 5	9880000	9540000	4950000	3980000	5370000	9780000	3390000	11900000	9900000	6050000	6730000	9940000	6740000	4330000	7000000	6490000	8680000	10300000	6930000	12000000	6540000	7570000	7490000	7160000	9510000	7420000	6860000	6190000	2950000	11300000	4020000	7060000	15100000	2410000	8880000	10300000	7220000	11600000	10400000	9720000	7700000	9340000	10500000	13500000	9680000
P98160	P98160	PGBM_HUMAN	HSPG2	Basement membrane-specific heparan sulfate proteoglycan core protein	9050000	10600000	6470000	9940000	7400000	8250000	8200000	8220000	9250000	9480000	9490000	8310000	9410000	8440000	8000000	8090000	8690000	9060000	9020000	8500000	8030000	8020000	8140000	8120000	8710000	7120000	7720000	8640000	8600000	7540000	7050000	8160000	8170000	8420000	8350000	8440000	7320000	8210000	7630000	7870000	7680000	7460000	8210000	7870000	9940000
Q00610	Q00610	CLH1_HUMAN	CLTC	Clathrin heavy chain 1	7270000	5030000	4960000	4780000	6650000	5350000	3750000	8770000	8570000	5470000	7660000	4930000	5880000	4680000	3150000	4640000	5120000	5080000	5020000	5640000	5030000	5510000	5170000	4660000	5710000	7600000	4940000	3970000	5700000	5680000	5600000	7880000	8160000	6390000	9300000	22100000	6600000	6750000	3290000	6350000	6690000	4840000	7620000	5120000	5070000
Q01459	Q01459	DIAC_HUMAN	CTBS	Di-N-acetylchitobiase	2850000	6500000	4010000	3060000	8990000	3010000	4760000	5110000	5640000	8340000	10500000	10400000	4570000	6230000	6260000	9990000	6460000	7400000	4670000	4700000	6520000	8200000	6170000	5230000	2790000	5640000	7190000	8290000	9880000	4210000	6640000	5710000	7420000	5480000	4760000	4740000	10600000	7190000	10500000	6920000	8410000	6570000	7600000	6620000	6850000
Q01469	Q01469	FABP5_HUMAN	FABP5	Fatty acid-binding protein 5	693658	648925	881461	3240000	841541	3240000	635387	633254	590425			2680000	3750000	562725	628603		758576	686690	701652	633784	2930000	2850000	687271	690996	571266	591707	543072	545201	582974	685525	659493	612400	662037	3940000	677083	718027	1270000		559665	595004		639863	510058	3890000	3640000
Q01518	P40123;Q01518	CAP1_HUMAN	CAP1	Adenylyl cyclase-associated protein 1	100000000	114000000	131000000	101000000	115000000	111000000	96600000	80900000	92500000	80500000	68500000	66500000	79500000	75300000	74500000	56300000	81700000	88000000	77600000	94900000	77100000	96200000	74200000	73700000	84200000	85300000	82600000	89700000	97200000	95100000	86400000	85900000	80400000	95200000	83500000	103000000	80300000	78100000	81200000	92600000	82400000	98900000	80000000	80500000	87500000
Q02413	Q02413	DSG1_HUMAN	DSG1	Desmoglein-1	360000000	329000000	164000000	83100000	288000000	305000000	350000000	352000000	325000000	289000000	299000000	304000000	261000000	279000000	286000000	248000000	258000000	306000000	276000000	249000000	280000000	279000000	278000000	320000000	284000000	323000000	284000000	255000000	280000000	257000000	306000000	275000000	288000000	322000000	301000000	308000000	320000000	349000000	342000000	325000000	354000000	344000000	288000000	311000000	306000000
Q03181	Q03181	PPARD_HUMAN	PPARD	Peroxisome proliferator-activated receptor delta	397159	536587	525119	475429	667621	512535	406777	355954	469061	559002	549936	448510	418441	386746	324618	398553	465866	516432	419603	406832	426691	434170	403109	392203	371431	359788	398088	442983	499837	396155	428466	409532	393406	434240	374774	263511	371595	348923	401924	427643	459752	452433	406222	418648	495639
Q03591	Q03591	FHR1_HUMAN	CFHR1	Complement factor H-related protein 1	178000000	230000000	242000000	214000000	266000000	199000000	193000000	166000000	192000000	202000000	188000000	185000000	131000000	119000000	120000000	112000000	127000000	121000000	126000000	109000000	110000000	115000000	112000000	114000000	147000000	115000000	122000000	130000000	138000000	128000000	130000000	136000000	129000000	137000000	138000000	109000000	169000000	150000000	154000000	174000000	180000000	191000000	171000000	175000000	214000000
Q04756	Q04756	HGFA_HUMAN	HGFAC	Hepatocyte growth factor activator	5370000	6080000	7230000	5890000	6960000	5470000	5690000	5580000	6070000	5510000	4560000	5390000	4760000	4490000	4900000	4390000	4790000	4930000	4710000	4760000	4450000	5090000	4820000	4260000	5170000	4740000	4960000	4420000	4660000	4740000	4900000	5050000	4740000	4910000	4590000	4670000	4760000	4680000	4590000	4940000	4820000	5150000	4810000	4080000	5450000
Q05682	Q05682	CALD1_HUMAN	CALD1	Caldesmon	43200000	56700000	24400000	41700000	25300000	49300000	45700000	41200000	43400000	45400000	52100000	42500000	46700000	51600000	55300000	54500000	51300000	55700000	47600000	47600000	40600000	52700000	43500000	44600000	32200000	18500000	24400000	24100000	30400000	30100000	24100000	23700000	23800000	27200000	24100000	26500000	35600000	37200000	51400000	43800000	41200000	51100000	37900000	36900000	44800000
Q06033	Q06033	ITIH3_HUMAN	ITIH3	Inter-alpha-trypsin inhibitor heavy chain H3	216000000	210000000	289000000	271000000	284000000	228000000	258000000	215000000	222000000	203000000	194000000	192000000	223000000	229000000	223000000	220000000	211000000	234000000	223000000	222000000	228000000	220000000	219000000	195000000	190000000	188000000	205000000	203000000	205000000	214000000	193000000	194000000	172000000	163000000	169000000	152000000	198000000	218000000	216000000	224000000	225000000	238000000	230000000	240000000	236000000
Q06830	Q06830	PRDX1_HUMAN	PRDX1	Peroxiredoxin-1	9550000	10700000	23800000	15100000	4730000	21000000	15700000	14200000	15900000	15400000	21900000	14900000	16600000	14100000	15800000	15900000	14800000	13100000	14200000	16000000	10200000	16400000	12600000	12700000	11800000	10100000	10900000	13600000	13800000	11200000	11300000	12100000	12600000	14000000	12300000	13700000	18500000	13000000	13700000	14300000	13600000	14900000	14100000	14200000	18000000
Q07075	Q07075	AMPE_HUMAN	ENPEP	Glutamyl aminopeptidase	12900000	8420000	13500000	12700000	13600000	6230000	8410000	7910000	7270000	9860000	6760000	7850000	10700000	7810000	9670000	7840000	11100000	9160000	10600000	8490000	9950000	10400000	9470000	11100000	8900000	10000000	11000000	8740000	9670000	11000000	9980000	12400000	10800000	9290000	10700000	11500000	9160000	10500000	9450000	10900000	10900000	10500000	10400000	11100000	10500000
Q07954	Q07954	LRP1_HUMAN	LRP1	Prolow-density lipoprotein receptor-related protein 1	217000000	203000000	254000000	195000000	210000000	202000000	182000000	168000000	148000000	191000000	154000000	186000000	172000000	163000000	160000000	160000000	161000000	168000000	160000000	166000000	148000000	154000000	152000000	154000000	151000000	143000000	133000000	151000000	140000000	137000000	137000000	140000000	148000000	166000000	139000000	173000000	157000000	154000000	150000000	147000000	150000000	165000000	164000000	162000000	165000000
Q08188	Q08188	TGM3_HUMAN	TGM3	Protein-glutamine gamma-glutamyltransferase E	33800000	36000000	43500000	34700000	33700000	39300000	36500000	32100000	29800000	27000000	27200000	29700000	28600000	28000000	29600000	30000000	28900000	29000000	28200000	26600000	27700000	28800000	27200000	24100000	28900000	24400000	29900000	31500000	33400000	31600000	28300000	29300000	27100000	24300000	26300000	25800000	28400000	27900000	33100000	31400000	33800000	36400000	26800000	29600000	30100000
Q08380	Q08380	LG3BP_HUMAN	LGALS3BP	Galectin-3-binding protein	308000000	301000000	312000000	314000000	367000000	317000000	356000000	341000000	349000000	283000000	259000000	237000000	250000000	222000000	250000000	242000000	219000000	235000000	257000000	277000000	272000000	274000000	279000000	216000000	328000000	329000000	346000000	344000000	329000000	336000000	343000000	325000000	313000000	308000000	283000000	287000000	268000000	280000000	304000000	295000000	290000000	269000000	248000000	256000000	272000000
Q08554	Q08554	DSC1_HUMAN	DSC1	Desmocollin-1	4470000	5390000	6600000	5860000	7480000	5730000	4680000	3330000	4440000	4970000	1950000	3640000	6170000	4250000	2930000	3430000	2700000	2530000	2390000	2000000	1400000	1900000	1500000	2400000	2290000	2350000	2150000	2500000	2590000	2160000	2330000	2440000	2240000	6180000	1750000	7320000	1730000	3760000	1740000	2430000	2620000	2740000	2470000	2130000	2820000
Q08830	Q08830	FGL1_HUMAN	FGL1	Fibrinogen-like protein 1	14400000	15800000	18500000	17300000	16600000	15800000	13000000	19500000	16100000	25900000	18600000	15600000	9830000	10200000	11700000	11200000	11400000	12500000	10700000	11200000	10900000	12500000	11800000	10500000	10500000	10500000	14400000	10900000	14000000	10900000	11500000	11700000	11500000	11400000	11200000	11700000	13300000	15200000	13700000	14200000	14200000	14600000	15400000	11900000	13500000
Q10588	Q10588	BST1_HUMAN	BST1	ADP-ribosyl cyclase/cyclic ADP-ribose hydrolase 2	606302	1540000	4820000	16900000	26600000	5850000	1060000	3590000	3580000	6890000	7430000	17800000	17400000	18000000	17400000	14700000	12200000	17100000	16100000	17500000	15900000	18300000	18200000	17100000	15800000	11200000	12500000	12700000	13300000	12600000	16500000	12400000	12300000	16200000	12300000	12900000	17700000	16200000	18200000	18400000	17400000	18600000	14800000	14400000	14000000
Q12805	Q12805	FBLN3_HUMAN	EFEMP1	EGF-containing fibulin-like extracellular matrix protein 1	49100000	60000000	51400000	49400000	62600000	51800000	53300000	43700000	45400000	34700000	39900000	30400000	55300000	45100000	51200000	46100000	48200000	41800000	47700000	41100000	46600000	47900000	46200000	45400000	46600000	46200000	52600000	49000000	46900000	53900000	48300000	49600000	44700000	40900000	48700000	51100000	41900000	47300000	46700000	43200000	39400000	44200000	43200000	42400000	44100000
Q12841	Q12841	FSTL1_HUMAN	FSTL1	Follistatin-related protein 1	3620000	4620000	1720000	3700000	2050000	2980000	3260000	1900000	2490000	2490000	3440000	1950000	4120000	3790000	3990000	3880000	4110000	4330000	5490000	4830000	3080000	3290000	3280000	3240000	2660000	3170000	2160000	2480000	3030000	3350000	2620000	2800000	2680000	2510000	2390000	2050000	2670000	2580000	3070000	3190000	3490000	3340000	3040000	3540000	4450000
Q12860	Q12860	CNTN1_HUMAN	CNTN1	Contactin-1	6810000	7640000	7850000	7610000	6500000	6870000	7240000	6980000	7850000	8130000	7170000	6800000	7570000	6350000	6720000	6070000	6640000	6470000	6420000	6300000	5850000	6280000	5890000	6210000	7010000	6020000	6200000	6350000	6790000	5810000	6460000	6810000	6560000	7110000	6700000	6260000	5410000	5790000	5310000	5740000	6310000	6350000	5690000	5790000	8150000
Q12866	Q12866	MERTK_HUMAN	MERTK	Tyrosine-protein kinase Mer	10700000	8370000	8100000	6320000	13000000	7140000	6410000	4050000	9760000	7260000	12300000	22100000	16400000	18200000	15900000	15400000	17000000	16000000	14000000	17200000	16100000	17800000	12300000	12700000		3150000	9100000	5220000	4920000	8290000	16800000	3850000	10700000	5430000	9230000	9500000	14500000	12000000	16800000	12200000	12700000	12800000	12300000	13000000	14600000
Q12884	Q12884	SEPR_HUMAN	FAP	Prolyl endopeptidase FAP	1600000	1530000	1480000	2500000	1410000	3490000	3720000	4540000	3870000	1890000	2260000	2120000	2400000	2490000	759733	1520000	1240000	1110000	2270000	2370000	3410000	3640000	1560000	2760000	2200000	3220000	3750000	1290000	4960000	1610000	3810000	3430000	4240000	2260000	2990000	3100000	4150000	4210000	1060000	4230000	4460000	4130000	4010000	4320000	1420000
Q12913	Q12913	PTPRJ_HUMAN	PTPRJ	Receptor-type tyrosine-protein phosphatase eta	29500000	12300000	53300000	42300000	23300000	36900000	20000000	26800000	18300000	5580000		12000000	20000000	31600000	19800000	22100000	25100000	32100000	25700000	32400000	27400000	25400000	30300000	24700000	23600000	32300000	19700000	21300000	16300000	38900000	25700000	27800000	23100000	25200000	26900000	28100000	14800000	29400000	15900000	28100000	22200000	29200000	27700000	25100000	23400000
Q13093	Q13093	PAFA_HUMAN	PLA2G7	Platelet-activating factor acetylhydrolase	4760000	8930000	6680000	11100000	11900000	8650000	6600000	5020000	5810000	5040000	4770000	4790000	5020000	7400000		6590000	6800000	2340000	4090000	5430000	5260000	2930000	5420000	3860000		6780000	9410000	6030000	7080000	4090000	4250000	2770000	6240000	6540000	7420000	2350000	4070000	6420000	1230000	6470000	3750000	4920000	5090000	2390000	1770000
Q13103	Q13103	SPP24_HUMAN	SPP2	Secreted phosphoprotein 24	3180000	5200000	2950000	4250000	2140000	6700000	4350000	3120000	5830000	5820000	3410000	3800000	6010000	4860000	4730000	3870000	3780000	4760000	4430000	5260000	3890000	4890000	4780000	3810000	2360000	3080000	3880000	3390000	4190000	2160000	2540000	3890000	2920000	2570000	3420000	1980000	2960000	4180000	3320000	3000000	2750000	2480000	2920000	2940000	2580000
Q13201	Q13201	MMRN1_HUMAN	MMRN1	Multimerin-1	88900000	102000000	45600000	16100000	3710000	105000000	112000000	28000000	85900000	70100000	64400000	73400000	67000000	59800000	62100000	63400000	66000000	63300000	63200000	62200000	53600000	57500000	55900000	63500000	62900000	55000000	58700000	59700000	59600000	57800000	61300000	59100000	60000000	71300000	64600000	67600000	61900000	63300000	62200000	71400000	67100000	67200000	63500000	67600000	67700000
Q13228	Q13228	SBP1_HUMAN	SELENBP1	Methanethiol oxidase	59200000	78400000	111000000	82700000	110000000	57700000	58400000	48200000	56800000	51500000	51600000	55800000	59000000	50700000	52500000	51500000	51200000	51900000	54700000	50400000	42400000	53500000	51100000	41100000	42100000	37200000	38200000	36700000	47100000	43000000	33900000	50200000	46700000	44200000	42100000	35400000	45000000	45100000	49800000	49700000	56100000	73300000	56100000	59500000	58600000
Q13332	Q13332	PTPRS_HUMAN	PTPRS	Receptor-type tyrosine-protein phosphatase S	147000000	157000000	8450000	152000000	15500000	153000000	192000000	196000000	176000000	151000000	148000000	179000000	147000000	151000000	169000000	153000000	152000000	159000000	164000000	164000000	179000000	148000000	167000000	136000000	121000000	160000000	137000000	118000000	150000000	142000000	145000000	132000000	153000000	130000000	152000000	94700000	134000000	143000000	134000000	136000000	147000000	128000000	160000000	142000000	281000000
Q13508	Q13508	NAR3_HUMAN	ART3	Ecto-ADP-ribosyltransferase 3	4610000	7270000	8030000	7990000	10500000	7890000	8970000	5630000	5960000	6780000	7290000	6000000	3240000	4540000	3530000	5400000	4560000	4970000	2910000	2330000	3690000	4960000	3250000	4160000	2380000	2850000	3630000	3070000	5730000	2820000	3950000	3500000	4290000	3850000	3700000	4660000	5670000	4340000	7910000	5320000	5560000	7280000	5210000	5310000	5660000
Q13740	Q13740	CD166_HUMAN	ALCAM	CD166 antigen	4540000	4140000	4610000	4820000	4280000	4240000	2710000	3060000	3800000	2970000	3270000	3130000	2310000	3170000	2990000	2540000	2270000	2910000	2790000	3260000	2820000	2640000	2700000	2840000	3190000	3030000	3240000	3040000	2980000	3370000	3120000	2830000	2620000	2760000	2830000	2600000	3920000	3470000	3200000	3190000	2780000	3200000	3120000	3070000	3330000
Q13790	Q13790	APOF_HUMAN	APOF	Apolipoprotein F	1900000	2030000	3800000	3130000	3690000	3610000	3080000	3100000	2890000	2720000	2950000	2470000	2910000	3250000	3080000	3380000	3100000	3170000	3210000	3520000	3500000	3540000	3560000	2570000	2880000	3450000	3680000	3160000	3700000	3090000	3390000	3570000	3270000	2750000	3190000	2610000	3290000	3550000	3980000	3360000	3270000	3640000	3640000	3590000	3320000
Q13822	Q13822	ENPP2_HUMAN	ENPP2	Ectonucleotide pyrophosphatase/phosphodiesterase family member 2	93900000	120000000	86900000	92100000	108000000	115000000	96600000	96900000	76100000	110000000	88000000	108000000	123000000	128000000	102000000	119000000	109000000	103000000	101000000	120000000	92000000	118000000	117000000	98200000	90400000	89400000	92400000	91900000	108000000	97400000	90700000	102000000	94500000	92300000	90200000	87400000	104000000	121000000	127000000	126000000	109000000	134000000	114000000	134000000	145000000
Q13867	Q13867	BLMH_HUMAN	BLMH	Bleomycin hydrolase	605192	1640000	1630000	1510000	1090000	1540000	2050000	2030000	1360000	1570000	1330000	1380000	1020000	1250000	1130000	878971	1330000	1340000	1820000	1370000	1230000	1150000	1320000	1030000	1030000	961300	938408	1070000	1030000	1510000	1280000	1050000	1370000	900815	1210000	1080000	833724	904729	812273	842586	1070000	837125	1280000	904878	1390000
Q14118	Q14118	DAG1_HUMAN	DAG1	Dystroglycan 1		585726				572388				456363										1420000	1450000	1590000	1660000		1430000		1560000		1490000		1440000		1450000		1300000	1280000			1720000	322274	369769			349641	1320000
Q14126	Q14126	DSG2_HUMAN	DSG2	Desmoglein-2	1260000	215599	469522	721863		1900000	329231	722170	1430000	1110000	1340000	702442	449130	725384	768172	695241	768350	908159	830832	783947	800850	748346	753565	658103	1170000	1020000	1090000	1130000	1210000	1210000	1140000	1200000	1090000	959914	941514	897293	1100000	1150000	1310000	1290000	1410000	1530000	2430000	1320000	1360000
Q14247	Q14247	SRC8_HUMAN	CTTN	Src substrate cortactin	9290000	10900000	7090000	9220000	7570000	8940000	7890000	7930000	8200000	11700000	10700000	9150000	6710000	7610000	6580000	6760000	7330000	6480000	6440000	6300000	6490000	6420000	6350000	5980000	6990000	5880000	6600000	6700000	7040000	6570000	6520000	6310000	6740000	5880000	6660000	6370000	6680000	6630000	7010000	8020000	7320000	9510000	6830000	7390000	4910000
Q14515	Q14515	SPRL1_HUMAN	SPARCL1	SPARC-like protein 1	51800000	87100000	52200000	84100000	87000000	84000000	81100000	74800000	87800000	75100000	123000000	126000000	68200000	78900000	70400000	72700000	70900000	75500000	62400000	62900000	66100000	80700000	72800000	69700000	56900000	56500000	60400000	55800000	67500000	45500000	53800000	55800000	55000000	66000000	53300000	62100000	65800000	64600000	69300000	70900000	63700000	65900000	66300000	66900000	84100000
Q14520	Q14520	HABP2_HUMAN	HABP2	Hyaluronan-binding protein 2	10500000	13100000	12600000	10400000	13600000	11600000	11000000	9690000	9910000	11100000	10400000	8720000	9220000	9200000	8660000	8430000	9180000	9960000	8880000	8390000	8050000	8580000	8350000	7760000	8190000	7010000	7540000	7490000	8580000	7340000	7540000	8440000	7900000	7720000	7600000	6930000	6950000	7930000	8070000	9040000	8470000	8070000	6870000	9410000	10300000
Q14624	Q14624	ITIH4_HUMAN	ITIH4	Inter-alpha-trypsin inhibitor heavy chain H4	24400000	24500000	31100000	24900000	32200000	25700000	23700000	25700000	23200000	21100000	20700000	19300000	20300000	19700000	19200000	18500000	18600000	21000000	20100000	20400000	21300000	20600000	21000000	18600000	18300000	19000000	18800000	18600000	19300000	18000000	18300000	19700000	17900000	16800000	17600000	15800000	21500000	21500000	22300000	21800000	22000000	22300000	22600000	22300000	20900000
Q15063	Q15063	POSTN_HUMAN	POSTN	Periostin	2730000	3220000	2890000	6080000	3020000	2200000	2330000	1200000	1750000	2420000	1780000	1630000	3320000	1960000	2370000	1620000	2150000	2270000	2010000	1860000	1690000	1850000	1730000	2270000	3460000	1570000	3270000	1090000	1560000	2560000	1730000	1730000	1800000	1980000	2030000	1730000	1900000	2020000	2440000	1720000	5490000	2400000	5400000	2380000	1840000
Q15084	Q15084	PDIA6_HUMAN	PDIA6	Protein disulfide-isomerase A6	9800000	24000000	33700000	27900000	36300000	27300000	23200000	22600000	17900000	12200000	7780000	11600000	16600000	18100000	17100000	12900000	16100000	14400000	19200000	30800000	19900000	29000000	25700000	13700000	12600000	16900000	23600000	15200000	17200000	16400000	3510000	3260000	14800000	6720000	15400000	5660000	15000000	13600000	20300000	13800000	13900000	13700000	22000000	15300000	19900000
Q15113	Q15113	PCOC1_HUMAN	PCOLCE	Procollagen C-endopeptidase enhancer 1	16600000	22800000	7650000	13400000	5890000	22800000	22300000	32700000	24700000	19600000	22400000	21200000	21400000	24700000	26800000	24400000	25100000	26600000	21000000	24100000	23200000	22600000	22600000	24000000	43700000	32600000	35600000	28300000	26300000	28300000	22700000	25100000	28400000	30000000	25800000	23600000	22100000	23600000	20800000	20000000	20100000	18400000	24400000	22500000	18300000
Q15166	Q15166	PON3_HUMAN	PON3	Serum paraoxonase/lactonase 3	16100000	11800000	13500000	13500000	18900000	11600000	14300000	13900000	12600000	12300000	11800000	10200000	10800000	9670000	10500000	9500000	9870000	10500000	11200000	12000000	9860000	10300000	10300000	9260000	10700000	9340000	10300000	9520000	8930000	9380000	8870000	9830000	8670000	9330000	9950000	10300000	10300000	10200000	9300000	10400000	10800000	9760000	9990000	10200000	9650000
Q15404	Q15404	RSU1_HUMAN	RSU1	Ras suppressor protein 1	11700000	22600000	18600000	28800000	15900000	26600000	18600000	18900000	37900000	27900000	25300000	27500000	14900000	7720000	10900000	10500000	7950000	9000000	12300000	5850000	14100000	13600000	14900000	14100000	14200000	12600000	14400000	14500000	14000000	14100000	13200000	14600000	14500000	13300000	15100000	13600000	14500000	13400000	14800000	14100000	14200000	14000000	14800000	15400000	27600000
Q15485	Q15485	FCN2_HUMAN	FCN2	Ficolin-2	50500000	59800000	5710000	15700000	7190000	13800000	28600000	46400000	19100000	18600000	7480000	11900000	5910000	3280000	3540000	3060000	3870000	3600000	2730000	3380000	3100000	3700000	3610000	3690000	4910000	3830000	4140000	6290000	4180000	3650000	3450000	3280000	4440000	3880000	3130000	4040000	3800000	3380000	3870000	3090000	3420000	4240000	3150000	3620000	5390000
Q15517	Q15517	CDSN_HUMAN	CDSN	Corneodesmosin	895561	1200000	1410000		1250000					2170000	2700000	2780000	2320000	1900000	1480000	1410000	1730000	1010000	2040000	1730000	1010000	1430000	1380000	1850000				1630000			2000000	1740000	2080000	1910000	1900000	1810000					2380000	2800000	2940000		2450000
Q15555	Q15555	MARE2_HUMAN	MAPRE2	Microtubule-associated protein RP/EB family member 2	127000000	180000000	85900000	146000000	84900000	150000000	143000000	120000000	147000000	144000000	136000000	135000000	69200000	64200000	67500000	63200000	71600000	69500000	68700000	53500000	39200000	56400000	49600000	55200000	84100000	64700000	71900000	75400000	80900000	72800000	66000000	73800000	71900000	75700000	68500000	63400000	82100000	71800000	87200000	89600000	89800000	111000000	87900000	90000000	127000000
Q15582	Q15582	BGH3_HUMAN	TGFBI	Transforming growth factor-beta-induced protein ig-h3	45600000	64800000	61300000	63800000	54400000	61800000	62400000	60400000	54300000	63600000	64800000	56400000	53300000	54500000	52900000	55600000	57500000	54500000	59600000	50200000	47200000	55300000	54100000	48200000	45600000	41600000	44100000	46000000	59000000	41400000	41800000	44600000	47600000	47800000	43300000	39800000	50500000	55700000	58600000	52800000	55500000	51600000	57800000	59400000	57500000
Q15691	Q15691	MARE1_HUMAN	MAPRE1	Microtubule-associated protein RP/EB family member 1	12700000	12700000	13400000	49800000	8450000	49400000	11500000	11300000	7550000	48500000	46900000	54100000	27600000	34600000	39200000	39100000	39000000	37700000	36400000	35700000	38700000	36900000	37200000	36400000	34200000	35900000	35900000	40200000	31800000	32300000	43500000	42400000	36800000	43100000	32100000	49400000	38800000	42800000	44400000	38500000	40400000	41600000	37300000	40000000	34600000
Q15762	Q15762	CD226_HUMAN	CD226	CD226 antigen	2560000	17700000	4430000	19200000	4870000	20600000	15600000	16200000	18100000	18500000	625217	11700000	18500000	16800000	17000000	18200000	16000000	14600000	17600000	17900000	20000000	18500000	19800000	23100000	17700000	19300000	18200000	20100000	23400000	16200000	17400000	17000000	17800000	16700000	18100000	17500000	18000000	21700000	15100000	16800000	23400000	19100000	18100000	16000000	23100000
Q15828	Q15828	CYTM_HUMAN	CST6	Cystatin-M	119994	1340000	175586	137060	182590	163831	142597	67930	128936	1000000	99908.7	91215.6	88222.6	89432.6	154870	118271	100395	89521.1	81799.3	59027.5	86997.1	76316	118693	98141.3	109015	75867.1	87090.4	67806.6	73490.8	67861	69881.9	98942.1	99854.2	114655	116083	135386	126051	120488	102036	89688.1	112294	145212	107969	74132.6	79046.1
Q15848	Q15848	ADIPO_HUMAN	ADIPOQ	Adiponectin	84704.7	133430	96059.4	105910	138857	109913	63699.3	43411.4	74091.4	60466.1	80779.8	68349.2	178292	146645	137638	140274	157479	172536	133471	159642	121292	154156	118399	139999	150876	71302.6	50538.3	114015	74384.1	56332.5	77014.9	71619.1	160775	61174.8	55577.1	104041	95357.6	94758.4	95250.9	118243	106608	130227	97805.6	122233	169603
Q15942	Q15942	ZYX_HUMAN	ZYX	Zyxin	157000000	152000000	226000000	190000000	218000000	196000000	144000000	115000000	125000000	135000000	156000000	153000000	172000000	132000000	154000000	190000000	166000000	216000000	169000000	134000000	139000000	189000000	133000000	168000000	133000000	155000000	181000000	171000000	205000000	167000000	161000000	162000000	165000000	142000000	158000000	174000000	161000000	175000000	204000000	179000000	181000000	216000000	174000000	181000000	192000000
Q16270	Q16270	IBP7_HUMAN	IGFBP7	Insulin-like growth factor-binding protein 7	2100000	2570000	2830000	2270000	3080000	2090000	2050000	2210000	2390000	2430000	2680000	2110000	2010000	2390000	1910000	2130000	2290000	2200000	1790000	1870000	1930000	2570000	2390000	1810000	1760000	1550000	1690000	1460000	2080000	1420000	1800000	1760000	1820000	1740000	1670000	1840000	1980000	1580000	1990000	2070000	2010000	2040000	2140000	1910000	2720000
Q16610	Q16610	ECM1_HUMAN	ECM1	Extracellular matrix protein 1	5320000	5100000	6580000	5250000	6930000	5250000	5930000	5380000	4970000	4310000	4120000	3690000	5340000	5560000	7100000	5460000	5350000	6160000	5900000	6430000	6510000	6200000	6160000	5500000	5320000	5080000	5230000	5310000	5590000	5920000	5210000	5410000	4930000	4450000	4840000	4360000	5810000	5910000	5930000	6780000	5570000	5480000	5570000	6510000	7820000
Q16627	Q16627	CCL14_HUMAN	CCL14	C-C motif chemokine 14	77100000	78200000	64700000	79100000		81000000	71800000		53300000	47400000	52700000	57200000	37200000	34700000	40100000	36100000	39400000	38600000	34100000	34000000	37000000	36100000	32800000	36700000	35900000	33800000	31500000	43700000	40000000	33800000	33800000	43300000	41000000	66700000	40500000	44900000		42000000	48900000	45500000	44500000	51800000	39400000	44800000	37500000
Q16706	Q16706	MA2A1_HUMAN	MAN2A1	Alpha-mannosidase 2	78600000	76600000	99700000	87200000	105000000	92000000	55800000	63900000	65600000	51600000	46500000	37900000	50300000	43500000	45400000	48400000	42300000	45000000	48900000	52700000	48500000	50700000	49300000	43400000	56900000	64400000	55900000	52400000	51400000	52600000	47900000	57300000	48200000	48800000	47400000	43700000	54700000	43500000	47800000	48700000	55000000	50300000	46300000	49200000	42800000
Q16853	Q16853	AOC3_HUMAN	AOC3	Membrane primary amine oxidase	12400000	17100000	26500000	22700000	19600000	16700000	19500000	12600000	17100000	18200000	16300000	14600000	13500000	9930000	9530000	9860000	11100000	8300000	12500000	10300000	3580000	10500000	8070000	9800000	14500000	10400000	9390000	10500000	15900000	9370000	11400000	10300000	8050000	8570000	12700000	9980000	3410000	13900000	14800000	14000000	9700000	11000000	10300000	9840000	19100000
Q3SY84	Q3SY84	K2C71_HUMAN	KRT71	Keratin, type II cytoskeletal 71	2750000	3090000	672769	3520000	4630000	3450000	727699	585971	663258	101000000	3430000	3020000	3720000	2820000	5090000	5190000	4350000	4710000	4580000	4830000	5830000	5380000	5730000	3370000	808009	2120000	841801	1280000	1960000	2130000	1040000	1000000	1190000	1150000	1080000	1270000	855448	1770000	2670000	1180000	1040000	1630000	2380000	976665	769922
Q3ZCW2	Q3ZCW2	LEGL_HUMAN	LGALSL	Galectin-related protein	609724	1400000	1960000	624267	2320000	1200000	725455	494610	581473	324214	429517	727296	664924	788430	815440	914151	756472	941880	858747	996307	981567	1020000	825984	904107	573504	1310000	758521	1330000	1010000	1010000	899628	537820	744074	937035	816354	998178	905182	867890	913376	838915	904268	845610	955815	790723	943462
Q4LDE5	Q4LDE5	SVEP1_HUMAN	SVEP1	Sushi, von Willebrand factor type A, EGF and pentraxin domain-containing protein 1	443000000	491000000	15600000	426000000	576000000	417000000	447000000	495000000	447000000	463000000	490000000	464000000	391000000	363000000	402000000	373000000	389000000	393000000	348000000	397000000	387000000	416000000	427000000	439000000	436000000	420000000	380000000	424000000	390000000	399000000	454000000	403000000	423000000	427000000	429000000	437000000	423000000	417000000	424000000	387000000	402000000	423000000	377000000	390000000	349000000
Q562R1	Q562R1	ACTBL_HUMAN	ACTBL2	Beta-actin-like protein 2	1190000	2110000	3250000	2560000	11900000	2330000	1790000	2380000	1630000	1470000	2240000	1370000	1860000	1830000	3500000	877790	1460000	1610000	4680000	4210000	1320000	1280000	1840000	1630000	2820000	1470000	1970000	1690000	1740000	2390000	1420000	2630000	1720000		1720000	2660000	2580000	3230000	1800000	2220000	3780000	5190000	5270000	3490000	6350000
Q58FF6	Q58FF6	H90B4_HUMAN	HSP90AB4P	Putative heat shock protein HSP 90-beta 4	5470000	3870000	7290000	5360000	6700000		4210000	5800000		4360000			2890000			3050000							3870000		3270000	3320000	4310000		3320000		3670000	3600000	2460000	2030000	3160000		3750000		4780000	4240000		3690000	3800000
Q5SYB0	Q5SYB0	FRPD1_HUMAN	FRMPD1	FERM and PDZ domain-containing protein 1	35900000	63100000	37300000	71300000	50000000	66300000	44900000	48600000	50800000	26200000	46600000	36700000	51300000	77400000	52400000	55200000	73200000	62800000	68900000	77500000	68400000	66800000	73300000	62700000	64200000	52200000	45400000	49300000	45100000	52500000	51300000	53000000	41300000	44000000	51400000	43400000	49000000	48500000	33000000	45400000	53200000	39400000	46000000	53300000	59300000
Q5T749	Q5T749	KPRP_HUMAN	KPRP	Keratinocyte proline-rich protein	5090000	7700000	1850000	5450000	6140000	2360000	3950000	3390000	2840000	2410000	3130000	3170000	3390000	3210000	1790000	3310000	1560000	4450000	5100000	1790000	1670000	8270000	3570000	2980000	1960000	1620000	2590000	2800000	3380000	1400000	1850000	2480000	3460000	2790000	2940000	3840000	1880000	3350000	3770000	3750000	1880000	3540000	3160000	5170000	3580000
Q6E0U4	Q6E0U4	DMKN_HUMAN	DMKN	Dermokine			2160000	1720000	1970000	1510000	1410000						1320000	1290000	1230000	1230000	1310000	1400000	1370000	1310000	1380000	1350000	1360000	1230000	1640000	1300000	1250000			1400000	1300000	1280000	1290000	1170000	1290000	1040000			1250000	1340000	1420000	1280000		1270000	1140000
Q6EMK4	Q6EMK4	VASN_HUMAN	VASN	Vasorin	4110000	2150000	2580000	2030000	2740000	4180000	2080000	2330000	2120000	2030000	1910000	1570000	3120000	2910000	2960000	2910000	3700000	2820000	3420000	3280000	3000000	2770000	3200000	3060000	2670000	3010000	2710000	2940000	3160000	3020000	3220000	3070000	2980000	2850000	2800000	2470000	2750000	2950000	2930000	2910000	3080000	2950000	3000000	3050000	3840000
Q6GTS8	Q6GTS8	P20D1_HUMAN	PM20D1	N-fatty-acyl-amino acid synthase/hydrolase PM20D1	2660000	5260000	1580000	3120000	3360000	5070000	3190000	3410000	2880000	2960000	2790000	4000000	1530000	3660000	2810000	2270000	2730000	2160000	2270000	2240000	2440000	2090000	2240000	3280000	2850000	2110000	1880000	1910000	1520000	2280000	2250000	1760000	1700000	2320000	3000000	2160000	1610000	2570000	4850000	1610000	2970000	1700000	2300000	1800000	2160000
Q6P179	Q6P179	ERAP2_HUMAN	ERAP2	Endoplasmic reticulum aminopeptidase 2	6350000	7580000	4400000	8070000	10200000	8400000	8360000	7390000	7750000	7820000	3560000	7330000		9870000	8150000	11000000	9500000	11800000	10100000	9530000	9270000		11400000	7090000		17100000		10200000	15600000	13200000	4220000	12600000	18600000	7480000	13100000	15600000		15200000	13900000	12400000	15200000	14100000	14700000	12400000	10500000
Q6UWP8	Q6UWP8	SBSN_HUMAN	SBSN	Suprabasin	3060000	2330000	3650000	3280000	4040000	2570000	2790000	2180000	2850000	1960000	1100000	1490000	2350000	2870000	3310000	1900000	2530000	2580000	2460000	2880000	1460000	3400000	3330000	3030000	3200000	1510000	2340000	2310000	1790000	2270000	2330000	2620000	2190000	1440000	1520000	1410000	1040000	1540000	1530000	2420000	2060000	2530000	2710000	2980000	2000000
Q6UX71	Q6UX71	PXDC2_HUMAN	PLXDC2	Plexin domain-containing protein 2	450727	883731	698467	386655	625223	408010	835146	901382	1220000	1540000	1460000	1610000	1670000	1470000	1560000	1500000	1370000	1400000	1420000	1440000	1490000	1450000	1490000	1370000	1380000	988426	1200000	1250000	1200000	1320000	1070000	1000000	1160000	1030000	1190000	1140000	1530000	1080000	1160000	1260000	1260000	1210000	1260000	1200000	1240000
Q6UXB8	Q6UXB8	PI16_HUMAN	PI16	Peptidase inhibitor 16	8430000	5980000	9060000	9050000	9800000	7840000	7410000	5990000	7410000	6750000	6760000	6590000	7070000	5480000	5710000	5410000	6230000	7070000	6160000	6380000	5720000	6570000	6420000	5750000	7070000	5880000	5770000	6000000	6640000	6380000	6020000	5910000	5870000	6620000	6540000	5330000	4780000	5730000	5430000	6330000	5400000	6100000	5200000	5670000	8470000
Q6YHK3	Q6YHK3	CD109_HUMAN	CD109	CD109 antigen	78200000	123000000	139000000	166000000	62000000	94200000	86100000	87800000	104000000	119000000	110000000	87300000	79200000	119000000	92200000	105000000	103000000	75200000	102000000	103000000	88400000	104000000	79700000	96800000	66300000	63600000	76600000	206000000	87900000	56500000	82000000	74900000	89500000	88500000	77600000	87000000	89600000	119000000	92800000	99000000	124000000	152000000	129000000	115000000	133000000
Q76LX8	Q76LX8	ATS13_HUMAN	ADAMTS13	A disintegrin and metalloproteinase with thrombospondin motifs 13	37300000	36500000	29100000	30200000	31500000	39500000	31700000	31200000	31600000	28400000	28100000	26200000	26400000	26100000	23300000	22400000	25700000	22500000	23100000	23300000	18800000	22000000	19000000	22000000	22300000	20500000	20100000	21300000	24000000	20800000	21200000	22400000	20200000	25300000	21300000	23600000	23000000	24200000	24200000	23700000	23600000	28000000	21700000	25400000	30300000
Q7Z794	Q7Z794	K2C1B_HUMAN	KRT77	Keratin, type II cytoskeletal 1b	3010000	3710000	3680000	4660000	3890000	3770000	3390000	2210000	3450000	4270000	4770000	3920000	3870000	3110000	2730000	3430000	3200000	3420000	3070000	2790000	2660000	2880000	2510000	2670000	2970000	2080000	2490000	2730000	2810000	2630000	2510000	2470000	2610000	2550000	2730000	3100000	2360000	2440000	2540000	2590000	2520000	2800000	2820000	3090000	4470000
Q7Z7G0	Q7Z7G0	TARSH_HUMAN	ABI3BP	Target of Nesh-SH3	8870000	6620000	5430000	4660000	4680000	6360000	7130000	8700000	10500000	8610000	8040000	6340000	5990000	5920000	9130000	7180000	7350000	6710000	5800000	11000000	3950000	5610000	3910000	5510000	7690000	7530000	5110000	5530000	6490000	6030000	5790000	7020000	7730000	6200000	8460000	9420000	6540000	5930000	7630000	4760000	5290000	9850000	6460000	8990000	7700000
Q7Z7M0	Q7Z7M0	MEGF8_HUMAN	MEGF8	Multiple epidermal growth factor-like domains protein 8	6310000	6640000	6910000	9650000	12100000	9150000	7240000	6900000	5610000	4680000	6600000	8220000	6190000	4660000	5120000	5190000	4990000	5560000	4610000	6310000	5050000	5830000	5840000	4770000	5980000	5040000	6630000	5960000	6000000	6570000	5470000	6150000	4640000	6190000	5150000	5100000	4640000	5030000	4880000	5160000	5320000	6660000	5290000	5520000	8820000
Q86SQ4	Q86SQ4	AGRG6_HUMAN	ADGRG6	Adhesion G-protein coupled receptor G6	5500000	5420000	7970000	9130000	7650000	5260000	5780000	5680000	4510000	12300000	4750000	5460000	5020000	4110000	4580000	3830000	4410000	4250000	4610000	4350000	4720000	4520000	4260000	4670000	4810000	5090000	5020000	4830000	5570000	4660000	4330000	4820000	4980000	4780000	5720000	5140000	4840000	4710000	5660000	5560000	5470000	5360000	4570000	5140000	9320000
Q86U17	Q86U17	SPA11_HUMAN	SERPINA11	Serpin A11	7570000	11000000	11100000	7720000	10200000	7810000	7310000	6440000	5840000	13000000	4860000	5100000	16700000	13300000	13900000	19300000	15300000	22700000	22100000	10800000	20200000	12700000	20600000	16200000	13900000	14500000	20100000	13900000	17400000	13000000	12400000	8730000	17800000	9990000	15100000	14300000	35200000	15400000	27200000	17800000	14700000	11800000	12200000	14500000	15800000
Q86UD1	Q86UD1	OAF_HUMAN	OAF	Out at first protein homolog	66700000	83800000	88200000	46900000	303000000		38700000	59300000	54400000	86900000	49300000	65400000		67300000	64100000	66200000	67500000	81900000	73400000	68300000	72000000	71500000	69900000		74500000	61900000	70000000	71100000	75500000	65600000	72700000	168000000	68100000	66200000	57900000	58300000	66300000	66300000	73500000	67500000	73000000	9060000	69000000	69400000	87500000
Q86UN3	Q86UN3	R4RL2_HUMAN	RTN4RL2	Reticulon-4 receptor-like 2	8000000			10900000	12400000		8510000	9280000	1140000						938023	5800000				10300000	8340000	6370000		6490000		9170000		9120000	1050000	11400000					8850000	742823		7110000		6910000			916428	6750000
Q86UX7	Q86UX7	URP2_HUMAN	FERMT3	Fermitin family homolog 3	330000000	259000000	351000000	288000000	205000000	276000000	257000000	265000000	261000000	270000000	284000000	255000000	274000000	244000000	259000000	243000000	266000000	256000000	256000000	245000000	213000000	241000000	228000000	238000000	287000000	241000000	253000000	259000000	254000000	263000000	256000000	259000000	258000000	276000000	245000000	286000000	286000000	251000000	281000000	290000000	284000000	301000000	274000000	272000000	315000000
Q86VB7	Q86VB7	C163A_HUMAN	CD163	Scavenger receptor cysteine-rich type 1 protein M130	12700000	16000000	16700000	11400000	13400000	13400000	10300000	5270000	14100000	15300000	16500000	13600000	10400000	11800000	11400000	10700000	11000000	14500000	15000000	15800000	12800000	12700000	15300000	12300000	11600000	13100000	10700000	11400000	13500000	11500000	10400000	11700000	10800000	11200000	11100000	10600000	10200000	10300000	13700000	11100000	7340000	13200000	11400000	11800000	10700000
Q86YT9	Q86YT9	JAML_HUMAN	JAML	Junctional adhesion molecule-like	6060000	6520000	5490000	8150000	11200000	4860000	4180000	9250000	8010000	7220000	6570000	6480000	6740000	7560000	6940000	8170000	7010000	8180000	8500000	5960000	9360000	5560000	8470000	6990000	7150000	8540000	6680000	6050000	10500000	7120000	7500000	7250000	8130000	6690000	7320000	5360000	8570000	9550000	9050000	7660000	9200000	7290000	8420000	9870000	8370000
Q8IWV2	Q8IWV2	CNTN4_HUMAN	CNTN4	Contactin-4	5240000	9880000	9430000	6700000	10700000	7820000	3790000	5790000	5800000	9080000	10400000	8040000	2630000	6450000	2480000	8950000	3940000	8430000	2160000	2110000	4590000	7970000	5560000	5930000	1460000	2270000	5860000	2940000	8840000	2770000	3100000	2750000	6960000	6280000		7510000	2650000	6430000	14300000	10300000	9540000	12800000	9480000	8290000	9770000
Q8IXL6	Q8IXL6	FA20C_HUMAN	FAM20C	Extracellular serine/threonine protein kinase FAM20C	2380000	2580000	3980000	3140000	4320000	2580000	2500000	2180000	3370000	2600000	2770000	3110000	1410000	2090000	2090000	1140000	2180000	2250000	2050000	2810000	2110000	2080000	1480000	1880000	2100000	1990000	2320000	2060000	2390000	2630000	2180000	2220000	2400000	1410000	2640000	2240000	2600000	2900000	2650000	2930000	2410000	3040000	3080000	2100000	2590000
Q8IZF2	Q8IZF2	AGRF5_HUMAN	ADGRF5	Adhesion G protein-coupled receptor F5	13300000	13000000	19000000	20400000	18000000	12400000	13300000	13300000	13800000	16600000	12200000	11400000	8980000	8620000	8800000	9070000	9310000	9950000	7530000	8220000	8080000	9940000	8730000	9720000	6240000	6920000	7340000	7900000	7460000	6980000	7890000	7870000	8110000	6850000	7000000	8340000	10500000	11100000	10300000	7900000	8260000	8250000	9860000	10900000	10100000
Q8N1N4	Q8N1N4	K2C78_HUMAN	KRT78	Keratin, type II cytoskeletal 78	1820000	2500000	3570000	2970000	5470000	4160000	5070000	2620000	3160000	2670000	2070000	2910000	2120000	2470000	2030000	3020000	3200000	2810000	2570000	3460000	2830000	3100000	2740000	2720000	2410000	2520000	2510000	2480000	2430000	2540000	2830000	2560000	2450000	2240000	2730000	2420000	3240000	2810000	3280000	3060000	2910000	3320000	3540000	3010000	2700000
Q8N5R6	Q8N5R6	CCD33_HUMAN	CCDC33	Coiled-coil domain-containing protein 33	3320000	4280000	4560000		5080000	6550000	3490000	2630000	3750000	3620000	2980000	43000000	3490000	2780000	2940000	2700000	35500000	3100000	3130000	2520000	30500000	36000000	3140000	2810000	8000000	2140000	2680000	4080000	3230000	2550000	2740000	3700000	2840000	1760000	2820000	24500000	2950000	2360000	2930000	2450000	2490000	3820000	2480000	2600000	4520000
Q8N6C8	Q8N6C8	LIRA3_HUMAN	LILRA3	Leukocyte immunoglobulin-like receptor subfamily A member 3												15000000			15700000						2040000			9820000																		21700000
Q8NBJ4	Q8NBJ4	GOLM1_HUMAN	GOLM1	Golgi membrane protein 1	11800000	16900000	23500000	15400000	18100000	16200000	14700000	13100000	14400000	14400000	13900000	13000000	10400000	10100000	9330000	9230000	10200000	11300000	9290000	9300000	8310000	9130000	8820000	9500000	13200000	10400000	12500000	11300000	12300000	11200000	11200000	11800000	10800000	11600000	11800000	11800000	11500000	12200000	11800000	10800000	11600000	11700000	11600000	11400000	13900000
Q8NBP7	Q8NBP7	PCSK9_HUMAN	PCSK9	Proprotein convertase subtilisin/kexin type 9	34400000	48900000	131000000	294000000	74200000		41500000	30000000	29400000	50800000	40300000	39900000	44800000	34000000	34500000	33600000	36500000	28800000	37600000	32400000	30100000	33400000	32100000	35900000	39600000	27600000	34600000	34700000	38600000	34500000	34800000	34400000	33800000	39700000	34000000	27300000	28000000	15900000	28700000	30700000	30700000	34000000	27100000	30300000	7360000
Q8TER0	Q8TER0	SNED1_HUMAN	SNED1	Sushi, nidogen and EGF-like domain-containing protein 1	170975	250630	318404	228799	337755	250341	245096	260082	255447	337959	406949	333211		188746															6200000					211760			246921		298077		280674	377229			233673
Q8WWZ8	Q8WWZ8	OIT3_HUMAN	OIT3	Oncoprotein-induced transcript 3 protein	28800000	29500000	35400000	26700000	34200000	20000000	25300000	108000000	9620000	24400000	14300000	22700000	92800000	24500000	10100000	20500000	12800000	21600000	43300000	13000000	33400000	14200000	15600000	29500000	36700000	31200000	28100000	39100000	25600000	29700000	26200000	15500000	18100000	19100000	14800000	20100000	26300000	26700000	28100000	28500000	25600000	18100000	29600000	26800000	13000000
Q8WZ75	Q8WZ75	ROBO4_HUMAN	ROBO4	Roundabout homolog 4	7040000	9940000	5970000	9640000	11000000	10200000	8500000	7090000	7580000	11500000	9700000	10000000	10300000	8960000	7920000	7850000	7510000	8610000	7480000	8230000	8360000	8940000	8330000	9730000	7990000	6490000	6890000	7290000	8280000	6990000	7260000	7020000	7020000	9140000	7830000	7920000	9260000	8000000	7560000	9500000	9410000	10100000	7940000	10100000	12400000
Q92484	Q92484	ASM3A_HUMAN	SMPDL3A	Acid sphingomyelinase-like phosphodiesterase 3a	1810000	891795		1110000	1650000	870281	967308	1110000	1350000	1540000	1790000	1590000	1520000	1190000	1610000	1490000	1470000	1170000	1090000	1450000	1330000	1580000	1530000	1390000	911711	819493	1170000	1110000	1270000	823437	1110000	1230000	937395	1240000	1150000	1020000	1510000	912961	1780000	765232	1390000	1580000	1420000	1200000	1020000
Q92496	Q02985;Q92496	FHR4_HUMAN	CFHR4	Complement factor H-related protein 4	3700000	3740000	3630000	3500000	4240000	3820000	3430000	2780000	3300000	3520000	3940000	3530000	5010000	4570000	3880000	4330000	5490000	5260000	3850000	4670000	4910000	4590000	4170000	3710000	5580000	5400000	6230000	6170000	6790000	5640000	5100000	5760000	5880000	5060000	6270000	4950000	5030000	4530000	4710000	5120000	4970000	5580000	3820000	5160000	5510000
Q92520	Q92520	FAM3C_HUMAN	FAM3C	Protein FAM3C	3840000	4440000	4080000	3230000	4070000	3110000	3250000	3110000	3140000	3550000	3890000	3120000	1830000	2030000	1940000	1930000	2380000	2030000	2030000	1980000	1940000	2060000	2100000	1970000	2800000	2460000	2710000	2630000	2930000	2570000	2440000	2850000	2740000	2840000	2850000	3070000	3540000	3650000	3880000	3920000	3900000	3890000	3560000	3590000	3450000
Q92820	Q92820	GGH_HUMAN	GGH	Gamma-glutamyl hydrolase	22500000	28100000	32200000	25100000	20700000	26100000	47700000	23900000	25600000	56100000	32600000	48400000	21400000	25000000	22500000	24400000	27200000	22300000	26400000	29800000	36700000	37700000	28400000	37900000	24800000	23100000	21600000	19500000	27300000	20500000	20400000	24700000	21200000	25700000	18700000	21000000	15100000	23400000	21800000	21400000	25200000	22900000	20800000	22400000	24300000
Q92859	Q92859	NEO1_HUMAN	NEO1	Neogenin	7120000	7210000	6840000	9450000	7810000	8260000	9480000	7470000	8070000	7660000	8670000	8930000	7670000	7160000	7610000	7440000	7030000	7430000	8130000	7830000	7830000	7890000	8460000	7460000	6200000	7190000	6770000	7470000	8030000	6160000	7550000	7140000	8070000	6850000	6760000	6850000	8780000	8190000	6590000	7500000	8230000	8160000	8400000	7270000	7110000
Q92954	Q92954	PRG4_HUMAN	PRG4	Proteoglycan 4	17100000	19600000	23300000	19500000	20900000	18500000	16700000	14100000	16500000	19800000	17300000	16500000	14800000	15000000	14300000	13700000	16000000	15300000	15000000	13800000	14500000	15500000	14900000	14500000	13900000	12900000	13700000	14000000	14500000	13900000	13800000	13200000	14200000	13400000	14300000	14000000	13700000	15200000	14300000	15900000	16700000	16400000	16000000	15600000	15200000
Q96IY4	Q96IY4	CBPB2_HUMAN	CPB2	Carboxypeptidase B2	4220000	4830000	5460000	4560000	5450000	4710000	4290000	4740000	4390000	4200000	3600000	3260000	2630000	2890000	3750000	2810000	3220000	3350000	3300000	2970000	3110000	3210000	2990000	2840000	2950000	2750000	2950000	2980000	2930000	2920000	2840000	3360000	3150000	2660000	2860000	2790000	3440000	3780000	3730000	3880000	4080000	4020000	3920000	4360000	4400000
Q96KN2	Q96KN2	CNDP1_HUMAN	CNDP1	Beta-Ala-His dipeptidase	11900000	21300000	16400000	20500000	27000000	13000000	12000000	11300000	11000000	10600000	10800000	9540000	8510000	8340000	8560000	6960000	6850000	8040000	8320000	8110000	7250000	7950000	8420000	8080000	7350000	6810000	6630000	5670000	5550000	7640000	6470000	8050000	5880000	6220000	7180000	5620000	6690000	6720000	5390000	6170000	6300000	6380000	6960000	7010000	8380000
Q96P63	Q96P63	SPB12_HUMAN	SERPINB12	Serpin B12	48500000	46600000	76700000	55700000	74000000	69700000	48500000	62500000	51800000	28300000	18900000	28100000	53300000	58900000	62000000	65000000	60600000	80900000	57500000	62000000	67600000	73900000	70900000	62600000	52700000	56800000	64200000	64200000	62000000	74100000	59400000	63500000	57700000	57700000	53000000	57600000	54700000	58200000	61800000	65200000	61300000	73100000	66000000	69200000	67100000
Q96PD5	Q96PD5	PGRP2_HUMAN	PGLYRP2	N-acetylmuramoyl-L-alanine amidase	66000000	68500000	96100000	73100000	92900000	69900000	70900000	72200000	66400000	61600000	68600000	61500000	75000000	78700000	75600000	82000000	77000000	82600000	78300000	78000000	81100000	79500000	79700000	72900000	74600000	67300000	78000000	76600000	79800000	74400000	78600000	73900000	67500000	62700000	67500000	58800000	76200000	81200000	80200000	77400000	79000000	74100000	76900000	84500000	86400000
Q96RD9	Q96RD9	FCRL5_HUMAN	FCRL5	Fc receptor-like protein 5	3890000	2670000	3860000	3040000	4120000	1660000	2890000	2030000	2390000	2730000	3390000	2590000	6960000	7200000	7190000	7100000	6490000	6980000	6550000	7090000	6700000	7710000	7450000	7190000	4500000	5840000	5520000	5080000	5190000	4910000	4790000	5610000	5590000	4940000	5060000	4610000	6090000	6250000	5820000	5300000	5550000	5780000	6580000	6030000	4810000
Q96S96	Q96S96	PEBP4_HUMAN	PEBP4	Phosphatidylethanolamine-binding protein 4	9570000	11000000	8890000		9320000	7650000	455555	5300000	4100000	3330000	5740000	4930000		4570000	5300000	6390000	4460000	8500000	2820000	5220000	3080000	5090000	6240000	3840000	4630000	4180000	2860000	3220000	2330000	6790000	4440000	4720000	3660000	4120000	4260000	4810000	4470000	3350000	2770000	3380000	3120000	4270000	4570000	5070000	5280000
Q99784	Q99784	NOE1_HUMAN	OLFM1	Noelin		5730000	1000000	5850000	7450000	2850000	7140000	5570000		2480000	7700000	8320000	6250000	6080000	5430000	5170000	5510000	5640000	5660000	9820000	4000000	4640000	4160000	5420000	5760000	3200000	5010000	5350000	5830000		5170000	5040000	3630000	5300000	5120000	3920000	1880000	6430000	6430000	4500000	3850000	4580000	3570000	3540000	7180000
Q99969	Q99969	RARR2_HUMAN	RARRES2	Retinoic acid receptor responder protein 2	404000000	459000000	20200000	428000000	40300000	420000000	468000000	511000000	470000000	443000000	477000000	507000000	318000000	416000000	428000000	475000000	432000000	439000000	451000000	457000000	481000000	430000000	440000000	426000000	430000000	483000000	435000000	433000000	427000000	422000000	465000000	408000000	452000000	459000000	499000000	445000000	500000000	496000000	490000000	464000000	458000000	419000000	445000000	427000000	411000000
Q99972	Q99972	MYOC_HUMAN	MYOC	Myocilin	2800000	14900000	7080000	4910000	6160000	5850000		4540000	12500000	6890000	5140000	5240000	11500000	7190000	7310000	6530000	7250000	7630000	10100000	8070000	7200000	7800000	7210000	7900000	9440000	7150000	8300000	9410000	8160000	8420000	7460000	9700000	6640000	6930000	7830000	5000000	8530000	8220000	8380000	8470000	8710000	9090000	8520000	6320000	8990000
Q9BTY2	Q9BTY2	FUCO2_HUMAN	FUCA2	Plasma alpha-L-fucosidase	40700000	92500000	56600000	75900000	54300000	92900000	69500000	30900000	66800000	76300000	17200000	75200000	37900000	31500000	57900000	27600000	69600000	32600000	34100000	26800000	21500000	61800000	55200000	27200000	38300000	18400000	51600000	27500000	57200000	32600000	48600000	29000000	29700000	24500000	36400000	22200000		19900000	38200000	22700000	29700000	48300000	21000000	26200000	64400000
Q9BUN1	Q9BUN1	MENT_HUMAN	MENT	Protein MENT	146109	198047	208848	206692	263300	218057	137962	106785	143163	4960000	158060	143852	3860000	4760000	3030000	112220	104516	291579	3520000	92281.4	62351.2	3610000	71026.7	77813.1	95772.7	72929.4	97226.9	97672.3	3210000	71221.3	87902.6	85762.1	88421.8	96028.1	73968.5	84932.8	87766.2	88217.3	2990000	110294	105129	3460000	78480	88778	156238
Q9BWP8	Q9BWP8	COL11_HUMAN	COLEC11	Collectin-11	1900000	1510000	1430000	1910000	4190000	1100000	1200000	1470000	1280000	1450000	1510000	1330000	1260000	1040000	986285	1030000	1020000	1310000	1090000	985910	1330000	1330000	1530000	1100000	942698	1200000	926446	1030000	1120000	823460	1060000	1060000	1110000	1190000	1570000	860393	1590000	1260000	1240000	1070000	1280000	1380000	1300000	1050000	1190000
Q9BXR6	Q9BXR6	FHR5_HUMAN	CFHR5	Complement factor H-related protein 5	105000000	115000000	173000000	129000000	189000000	118000000	123000000	126000000	116000000	128000000	134000000	118000000	99700000	98400000	103000000	94600000	93700000	102000000	91800000	94700000	97600000	104000000	99700000	92900000	97700000	98500000	104000000	102000000	103000000	96300000	103000000	106000000	108000000	98800000	99000000	96100000	108000000	107000000	119000000	115000000	110000000	107000000	108000000	108000000	106000000
Q9H1U4	Q9H1U4	MEGF9_HUMAN	MEGF9	Multiple epidermal growth factor-like domains protein 9	382659	420302	399120	309175	373435	384839	309345	112534	287864	270904	211197	221486	299791	267690	296580	282304	358026	312932	334758	283663	311870	308659	281570	319209	406627	442176	438746	446421	425334	427843	393622	508371	490283	492978	499052	541714	362577	329883	369337	356741	334774	346401	329343	315309	272371
Q9H299	Q9H299	SH3L3_HUMAN	SH3BGRL3	SH3 domain-binding glutamic acid-rich-like protein 3	4120000	3970000	4530000	999747	2720000	919584	2340000	4000000	1530000	1250000	1090000	827853	1080000	1610000	1260000	1380000	1360000	1250000	1010000	1310000	1470000	2040000	1380000	1310000	1340000	1580000	1250000	1290000	1220000	1630000	1520000	1490000	1500000	1230000	1370000	1150000	1520000	1370000	1240000	1660000	1560000	1660000	1680000	1660000	823465
Q9H4A9	Q9H4A9	DPEP2_HUMAN	DPEP2	Dipeptidase 2	46023.3	12944.1	17559.4	23827.2	15181.7	14833.2	24878.1	52355.8	92643.5	31515.5	158146	148020	87420.9		108544	137689	80056.9	114120	56144.7	14981.7	49051.5	108540	94726.3	94234.7	59907.1		66107.8	55430.8	102182	49818.4		65342.5	75100.5	81748.1	162583	82657.6	134336		139077	99104.2	99955.4	135921	86893.5	46527.1	103774
Q9H7P6	Q9H7P6	MB12B_HUMAN	MVB12B	Multivesicular body subunit 12B				7690000	9740000	6980000	6580000					4890000								4620000																						4460000
Q9HBI1	Q9HBI1;Q9NVD7	PARVB_HUMAN	PARVB	Beta-parvin	7130000	8600000	6240000	9900000	9650000	3030000	2100000	1800000	2140000	3700000	3550000	3860000	2190000	1850000	1960000	1530000	1370000	1740000	1670000	1840000	1440000	1830000	1460000		1400000	1320000	1650000	1580000	1880000	2290000	1400000	1650000	1730000	1500000	1110000	1960000	2100000	1900000	2450000	2000000	2390000	2360000	1860000	1910000	1940000
Q9HBW9	Q9HBW9	AGRL4_HUMAN	ADGRL4	Adhesion G protein-coupled receptor L4	3310000	5690000	5150000	4110000	6200000	83700000	5510000	3660000	34500000	3420000	28200000	26000000	7280000	5770000	6040000	4340000	4750000	5670000	5000000	3580000	4920000	5130000	5980000	5730000	4120000	2610000	4420000	6710000	3460000	4670000	36100000	3880000	5450000	4500000	35500000	4050000	175000000	6080000		5190000	5560000	5610000	206000000	5240000	7900000
Q9HCL0	Q9HCL0	PCD18_HUMAN	PCDH18	Protocadherin-18	9670000	3620000	3770000	204000000	5040000	3060000	9350000	2390000	2610000	215000000	3660000	2320000	1960000	2070000	1890000	3010000	2140000	3390000	1740000	3380000	1550000	1780000	1730000	1760000	4970000	1840000	3040000	1860000	3290000	1820000	1860000	1750000	1920000	2620000	1800000	2650000	1870000	2150000	1950000	2360000	2360000	2370000	1890000	2080000	1790000
Q9HDC9	Q9HDC9	APMAP_HUMAN	APMAP	Adipocyte plasma membrane-associated protein	67000000	73600000	129000000	67100000	82000000	79600000	68300000	70800000	64200000	65900000	56300000	66200000	50900000	54100000	61600000	53600000	53500000	56700000	53300000	65600000	51600000	59400000	58600000	60100000	65000000	52100000	55800000	59700000	58100000	60000000	52800000	57800000	51100000	51200000	57200000	57500000	57400000	58600000	65500000	64900000	62200000	70300000	58200000	61600000	77700000
Q9NPH3	Q9NPH3	IL1AP_HUMAN	IL1RAP	Interleukin-1 receptor accessory protein	17400000	22500000	13600000	16600000	21800000	20500000	16000000	16300000	18500000	21200000	18700000	19100000	22100000	19200000	15200000	18100000	18400000	17900000	15200000	16200000	16000000	16900000	16500000	15900000	15800000	13800000	14800000	15700000	18500000	14600000	14900000	15900000	16600000	15500000	16600000	17100000	18300000	17500000	21300000	18200000	18300000	20500000	17100000	18000000	18200000
Q9NPR2	Q9NPR2	SEM4B_HUMAN	SEMA4B	Semaphorin-4B	218000000	288000000	300000000	337000000	319000000	270000000	317000000	304000000	272000000	266000000	282000000	235000000	256000000	285000000	226000000	264000000	270000000	291000000	258000000	268000000	265000000	245000000	257000000	230000000	214000000	222000000	234000000	247000000	260000000	265000000	251000000	253000000	237000000	215000000	267000000	204000000	251000000	277000000	272000000	294000000	269000000	243000000	326000000	325000000	346000000
Q9NPY3	Q9NPY3	C1QR1_HUMAN	CD93	Complement component C1q receptor	20200000	23600000	821786	20500000	759742	20500000	17100000	17100000	20700000	22300000	23200000	20500000	21400000	17900000	17600000	18300000	17600000	19500000	19100000	18200000	18200000	19300000	18300000	18500000	20400000	15900000	19600000	18900000	20000000	18000000	19400000	17800000	18800000	18700000	18100000	17600000	17400000	17000000	18900000	19000000	18100000	17900000	19500000	18200000	20700000
Q9NQ79	Q9NQ79	CRAC1_HUMAN	CRTAC1	Cartilage acidic protein 1	3050000	3660000	4830000	4280000	5200000	3370000	4860000	3220000	3670000	3350000	3320000	3110000	3670000	4460000	4060000	4200000	4260000	4520000	4400000	3670000	4280000	4070000	4320000	3530000	3660000	3640000	4260000	3770000	3930000	3830000	4490000	4090000	3980000	4050000	3910000	3640000	3650000	4060000	3640000	3960000	3680000	3580000	3700000	3730000	3220000
Q9NY97	Q9NY97	B3GN2_HUMAN	B3GNT2	N-acetyllactosaminide beta-1,3-N-acetylglucosaminyltransferase 2	16900000	14800000	21900000	15000000	21800000	17800000	16000000	16800000	16500000	10500000	11600000	10700000	19500000	18700000	16500000	14200000	15500000	15700000	18800000	22000000	18000000	14600000	18200000	15400000	20700000	21200000	16600000	16500000	14300000	18700000	15900000	17500000	15100000	15800000	17900000	13600000	17700000	19600000	17900000	13400000	14300000	13400000	18400000	18500000	14100000
Q9NZ08	Q9NZ08	ERAP1_HUMAN	ERAP1	Endoplasmic reticulum aminopeptidase 1	22200000	22500000	27600000	24200000	33400000	30500000	19700000	11600000	19300000	15900000	14900000	16200000	13300000	8070000	12600000	13700000	15000000	15500000	12500000	13900000	11600000	16000000	12500000	12800000	12400000	7800000	12100000	13100000	13100000	16100000	11700000	13900000	11600000	9470000	12200000	14000000	13400000	14300000	16500000	10400000	15500000	16400000	16500000	15100000	15000000
Q9NZD4	Q9NZD4	AHSP_HUMAN	AHSP	Alpha-hemoglobin-stabilizing protein	1000000	1110000	1380000	901102	551528	958284	920693	1030000	942158	951073	1040000	1090000	771220	690484	752647	739971	724130	743133	682692	736327	746725	805664	712194	777800	834024	801362	921543	843494	918541	902805	815729	912752	884587	786833	913776	1120000	1180000	901268	1090000	951226	911603	1200000	986693	963364	962283
Q9NZK5	Q9NZK5	ADA2_HUMAN	ADA2	Adenosine deaminase 2	16000000	15200000	25500000	15400000	26200000	15900000	13800000	12000000	22000000	17600000	16100000	15400000	20000000	16200000	17500000	14700000	14200000	16600000	13000000	15200000	12900000	23400000	13900000	14600000	16800000	20000000	11000000	15600000	17500000	16500000	16400000	17600000	16300000	21100000	15800000	16300000	16700000	13700000	15000000	14700000	16900000	15800000	13600000	14300000	16000000
Q9NZP8	Q9NZP8	C1RL_HUMAN	C1RL	Complement C1r subcomponent-like protein	4330000	4060000	5010000	4750000	4840000	5520000	6400000	6220000	5480000	4920000	5270000	4180000	4180000	3460000	2920000	3940000	3030000	3590000	3140000	3090000	3140000	3450000	3450000	3450000	3010000	2650000	3020000	3030000	3270000	2480000	2880000	2740000	3320000	2650000	2740000	2320000	3910000	3480000	4420000	3500000	3370000	3630000	3750000	3480000	3230000
Q9NZT1	Q9NZT1	CALL5_HUMAN	CALML5	Calmodulin-like protein 5	16600000	20400000	3130000	3100000	2810000	27700000	32100000	32700000	2210000	28100000	28200000	1910000	1770000	1830000	1710000	2050000	1880000	1990000	2020000	1900000	2200000	1920000	2050000	1680000	1670000	1740000	1610000	1560000	1640000	1530000	1730000	1760000	1470000	1420000	1620000		1390000	24400000	1590000	1570000	1490000	1470000	1730000	1710000	1360000
Q9P232	Q9P232	CNTN3_HUMAN	CNTN3	Contactin-3	10100000	9540000	14300000	8460000	11100000	10000000	13200000	10200000	9040000	10900000	12800000	10900000	9970000	10200000	9590000	10700000	10300000	10800000	10700000	10000000	9270000	11700000	11200000	10200000	11200000	11000000	10900000	10500000	10400000	10100000	10400000	10600000	10300000	10600000	10700000	10000000	11300000	11600000	12400000	11000000	11600000	11300000	11800000	11100000	11600000
Q9UBQ6	Q9UBQ6	EXTL2_HUMAN	EXTL2	Exostosin-like 2	3350000	1270000	405021	3650000	1210000	4710000	129531	153204	184153	1430000	336239	854175	405513	381805	378045	476003	277790	421021	308267	353592	355981	412770	379179	223816	342773	241374	271825	290558	338501	375087	562042	327130	320791	319970	313276	271118	373035	408845	330237	429911	401713	261611	438256	360908	302632
Q9UBR2	Q9UBR2	CATZ_HUMAN	CTSZ	Cathepsin Z	4930000	9420000	11000000	6600000	7590000	7230000	6900000	3730000	7950000	18900000	6520000	4240000	3980000	7000000	4220000	4760000	5670000	5600000	4220000	4950000	3960000	4290000	4180000	4330000	5570000	4320000	4530000	4490000	4970000	5800000	5220000	6080000	4710000	5650000	5550000	5340000	3970000	5030000	4170000	5610000	4490000	5940000	3820000	5410000	5420000
Q9UGM5	Q9UGM5	FETUB_HUMAN	FETUB	Fetuin-B	858983	1020000	1270000	1040000	1260000	970344	1040000	1050000	939718	934338	1030000	970566	465150	445120	438178	464716	445156	487575	452141	419342	437436	438521	445881	421443	694558	725772	760484	763707	785901	743674	755948	733905	745817	660145	726822	635031	711733	659071	751898	698237	678001	669529	669779	681839	535104
Q9UHG3	Q9UHG3	PCYOX_HUMAN	PCYOX1	Prenylcysteine oxidase 1	327000000	349000000	340000000	302000000	375000000	328000000	322000000	342000000	353000000	380000000	348000000	311000000	254000000	290000000	267000000	268000000	313000000	293000000	282000000	259000000	252000000	266000000	279000000	253000000	255000000	245000000	220000000	232000000	244000000	251000000	268000000	265000000	263000000	261000000	255000000	257000000	207000000	251000000	244000000	252000000	262000000	247000000	243000000	248000000	274000000
Q9UIB8	Q9UIB8	SLAF5_HUMAN	CD84	SLAM family member 5	64400000	62000000	94200000	64000000	92700000	70900000	70500000	65600000		76500000	64700000	68600000	59600000	59800000	60900000		69300000	50400000	56900000	55300000	56400000	73700000	55100000		54600000	54700000	51000000	41800000	45300000	45300000	48100000	60500000	46100000	44600000	48600000	63200000	58500000	50100000	50000000	47400000	51400000	48200000	45100000	55900000	45700000
Q9UJJ9	Q9UJJ9	GNPTG_HUMAN	GNPTG	N-acetylglucosamine-1-phosphotransferase subunit gamma	1800000	1730000	5800000	821273	5130000	813943	1170000	1060000	5740000	3320000	804866	1860000	1580000	1430000	1120000	887309	1640000	5020000	5210000	774426	1150000	1250000	1100000	3560000	9120000	6860000	10400000	9420000	7230000	8730000	8670000	9360000	4060000	1330000	7650000	2100000	1370000	6300000	10500000	9000000	9420000	11600000	3350000	9080000	1180000
Q9UK55	Q9UK55	ZPI_HUMAN	SERPINA10	Protein Z-dependent protease inhibitor	1020000000	1010000000	1280000000	1190000000	1470000000	1190000000	1090000000	1190000000	1180000000	1040000000	1100000000	981000000	688000000	724000000	626000000	710000000	684000000	713000000	679000000	686000000	674000000	696000000	670000000	601000000	604000000	706000000	655000000	624000000	682000000	624000000	687000000	711000000	572000000	559000000	615000000	552000000	720000000	857000000	842000000	760000000	810000000	822000000	841000000	837000000	882000000
Q9ULI3	Q9ULI3	HEG1_HUMAN	HEG1	Protein HEG homolog 1	6530000	6330000	4700000	12400000	4220000	3010000	11600000	4460000	5050000	3660000	4100000	5940000	4730000	5310000	4590000	4490000	5100000	4850000	4060000	4600000	4170000	5120000	4800000	4180000	5070000	4770000	4730000	4680000	4500000	3740000	4420000	4970000	4990000	5420000	4820000	5140000	3200000	4820000	3990000	5580000	5170000	4540000	6090000	5230000	5280000
Q9ULV4	Q9ULV4	COR1C_HUMAN	CORO1C	Coronin-1C	919789	1080000	396532	1110000	425595	1100000	327700	653086	1080000	758733	619758	570321	802455	557733	650789	448070	615598	580279	504913	534311	451253	563382	488162	496441	616811	490193	521034	571962	564765	468937	184109	406670	328019	576860	526065	504799	411440	535103	348111	573435	550613	672726	496350	639216	440146
Q9UNN8	Q9UNN8	EPCR_HUMAN	PROCR	Endothelial protein C receptor	1640000	1490000	2420000	1640000	1690000	1960000	2020000	1600000	2060000	2040000	1340000	2620000	1570000	1400000	1620000	1510000	1380000	1530000	1690000	2180000	1750000	1630000	1460000	1350000	1770000	2030000	2130000	1930000	2180000	1790000	2150000	2080000	1930000	2110000	2310000	2300000	1850000	1800000	1900000	1740000	2010000	1840000	1750000	2170000	2060000
Q9UNW1	Q9UNW1	MINP1_HUMAN	MINPP1	Multiple inositol polyphosphate phosphatase 1	3980000	8080000	7280000	7370000	5810000	4010000	4080000	2450000	3210000	3200000	3360000	2390000	2590000	2200000	2010000	2060000	2010000	2050000	2460000	1930000	1720000	1960000	1800000	2100000	2690000	2050000	2150000	2330000	2510000	2070000	2230000	2370000	1970000	2970000	2510000	2240000	2170000	1960000	2040000	2120000	2070000	1980000	2300000	2360000	3340000
Q9Y274	Q9Y274	SIA10_HUMAN	ST3GAL6	Type 2 lactosamine alpha-2,3-sialyltransferase	131000000	247000000	280000000	204000000	285000000	128000000	207000000	12600000	198000000	97400000	102000000	107000000	59800000	56700000	180000000	189000000	196000000	208000000	172000000	187000000	194000000	216000000	193000000	195000000	80000000	70600000	209000000	209000000	193000000	96100000	194000000	78200000	200000000	66500000	197000000	78700000	205000000	189000000	213000000	203000000	191000000	258000000	208000000	209000000	194000000
Q9Y279	Q9Y279	VSIG4_HUMAN	VSIG4	V-set and immunoglobulin domain-containing protein 4	2900000	3610000	4840000	3970000	6050000	3920000	4740000	4030000	4060000	4310000	4740000	5150000	4150000	4740000	4100000	3790000	4370000	3160000	4390000	4640000	4060000	4030000	4410000	4340000	4130000	6150000	4300000	4690000	4830000	5280000	4250000	5090000	7010000	7520000	5880000	8070000	4610000	5620000	3180000	4070000	4760000	3690000	4380000	3780000	3310000
Q9Y490	Q9Y490	TLN1_HUMAN	TLN1	Talin-1	33300000	37900000	48700000	37600000	43300000	42300000	33100000	37800000	35400000	32500000	43200000	35200000	31300000	34100000	33800000	32700000	35900000	35400000	34500000	36700000	31600000	33600000	33500000	30900000	28000000	30600000	31100000	31600000	30800000	30300000	30700000	34600000	33900000	31800000	32000000	31000000	32000000	32700000	32300000	33200000	36300000	37100000	31700000	34700000	35200000
Q9Y4G6	Q9Y4G6	TLN2_HUMAN	TLN2	Talin-2	8300000	8180000	5750000	12900000	7820000	8730000	8750000	5890000	8320000	6450000	5240000	5500000	9590000	8970000	9240000	8820000	6940000	6970000	8370000	8850000	7160000	9010000	8570000	8830000	5800000	7400000	9460000	9050000	9500000	8170000	8000000	7870000	8980000	8880000	8690000	9410000	11600000	6320000	9960000	8840000	9340000	8470000	8630000	7660000	8420000
Q9Y4L1	Q9BXT5;Q9Y4L1	HYOU1_HUMAN	HYOU1	Hypoxia up-regulated protein 1	24600000	20100000	26300000	20300000	23000000	18600000	16900000	19000000	21300000	21000000	22100000	21100000	13100000	17300000	14300000	14900000	16900000	15900000	13400000	14100000	14500000	14600000	13400000	13900000	17000000	14900000	15100000	14800000	16300000	16400000	17000000	17100000	18300000	17900000	16400000	19100000	16300000	21000000	15700000	19800000	17800000	18800000	16100000	18400000	20900000
Q9Y5C1	Q9Y5C1	ANGL3_HUMAN	ANGPTL3	Angiopoietin-related protein 3	41500000	29100000	46800000	24200000	44100000	38500000	31300000	28600000	20500000	30200000	33700000	32400000	30600000	35000000	32000000	31700000	31700000	29200000	28900000	27200000	26900000	29600000	27200000	29000000	31900000	28600000	34200000	32600000	34500000	29300000	32100000	31800000	34800000	35400000	32200000	33400000	36800000	35200000	42000000	39400000	37200000	39000000	33700000	37700000	34700000
Q9Y5Y7	Q9Y5Y7	LYVE1_HUMAN	LYVE1	Lymphatic vessel endothelial hyaluronic acid receptor 1	98202.3	111962	170328	125242	208701	158747	157657	155060	160823	140741	169328	141010	176473	174304	160192	170831	157737	188311	174255	177896	192411	186334	199450	169308	160858	176308	181719	168651	169736	162581	179913	177132	179017	140450	167041	180010	230779	212943	210815	195650	206132	209550	223004	190058	190392
Q9Y646	Q9Y646	CBPQ_HUMAN	CPQ	Carboxypeptidase Q	4320000	3830000	3810000	3670000	4910000	4390000	3350000	3860000	3620000	2620000	4460000	2760000	3090000	3400000	2920000	3570000	3020000	3140000	3160000	3250000	3370000	3730000	3460000	3100000	3300000	3590000	3590000	3450000	3780000	3400000	3460000	3590000	3750000	2350000	3380000	3400000	3780000	3640000	4050000	3850000	3910000	3760000	3710000	3340000	3590000
Q9Y6R7	Q9Y6R7	FCGBP_HUMAN	FCGBP	IgGFc-binding protein	1060000000	1210000000	1430000000	1140000000	1350000000	1080000000	1040000000	1010000000	1090000000	1200000000	1220000000	1140000000	1170000000	1250000000	1120000000	1190000000	1200000000	1270000000	1100000000	1210000000	1070000000	1180000000	1120000000	1070000000	1060000000	961000000	1020000000	1030000000	1170000000	1020000000	1000000000	1050000000	1040000000	1040000000	1020000000	953000000	1020000000	1050000000	1160000000	1050000000	1080000000	1090000000	1100000000	1070000000	1130000000
Q9Y6Z7	Q9Y6Z7	COL10_HUMAN	COLEC10	Collectin-10	1190000	1240000	2650000	1140000	2730000	3140000	1750000	3760000	2020000	2680000	3250000	2170000	74421.8	529541	177996	868858	661025	619583	1130000		528167	877007	650500	534824	1090000		1130000	762895	1210000	911096	818482	1110000	1100000	872451	2220000	876605	845378	941785	987919	739596	969490	917000	950265	906017	1010000
[truncated: 195 more columns]
